# Supplementary material for: Unsaturated trinuclear ruthenium carbonyls: large structural differences between analogous carbonyl derivatives of the first, second, and third row transition metals
Source: Royal Society of Chemistry journal article supplement (doi:10.1039/b810710f), 2008-01-01
Supplement: b810710f.pdf [file b810710f.pdf]

# Unsaturated Trinuclear Ruthenium Carbonyls: Large Structural Differences between Analogous Carbonyl Derivatives of the First, Second, and Third Row Transition Metals

Bin Peng,<sup>a</sup> Qian-Shu Li,<sup>\*a,b</sup> Yaoming Xie,<sup>c</sup> R. Bruce King,<sup>\*a,c</sup> and Henry F. Schaefer III<sup>c</sup>

<sup>a</sup>*Center for Computational Quantum Chemistry, South China Normal University, Guangzhou, 510631 China*

<sup>b</sup>*Institute of Chemical Physics, Beijing Institute of Technology, Beijing 100081, China*

<sup>c</sup>*Department of Chemistry and Center for Computational Chemistry*

*University of Georgia, Athens, Georgia 30602, USA*

## Supporting Information

**Tables S1 to S17.** Coordinates of  $\text{Ru}_3(\text{CO})_n$  ( $n = 12, 11, 10, 9$ )

**Tables S18 to S34.** Harmonic frequencies ( $\text{cm}^{-1}$ ) and infrared intensities ( $\text{km/mol}$ ) of  $\text{Ru}_3(\text{CO})_n$  ( $n = 12, 11, 10, 9$ )

**Tables S1A to S8A.** Complete lists of the total energies ( $E$ , in hartrees), relative energies ( $\Delta E$ , in kcal/mol), number of imaginary vibrational frequencies (Nimag), and  $\nu(\text{CO})$  frequencies for the  $\text{Ru}_3(\text{CO})_n$  ( $n = 12, 11, 10, 9$ ) structures by the MPW1PW91 and BP86 method using the SDD and LANL2DZ basis sets..

**Complete Gaussian 03 reference** (Reference 29)

**Table S1** Coordinates of Ru<sub>3</sub>(CO)<sub>12</sub> (**12-1**) *D*<sub>3</sub>

|    | MPW1PW91/SDD |           |           | MPW1PW91/LANL2DZ |           |           | BP86/SDD  |           |           | BP86/LANL2DZ |           |           |
|----|--------------|-----------|-----------|------------------|-----------|-----------|-----------|-----------|-----------|--------------|-----------|-----------|
|    | 0.000000     | 1.646977  | 0.000000  | 0.000000         | 1.650773  | 0.000000  | 0.000000  | 1.671803  | 0.000000  | 0.000000     | 1.676905  | 0.000000  |
|    | 1.426324     | -0.823488 | 0.000000  | 1.429612         | -0.825387 | 0.000000  | 1.447824  | -0.835902 | 0.000000  | 1.452242     | -0.838452 | 0.000000  |
| Ru | -1.426324    | -0.823488 | 0.000000  | -1.429612        | -0.825387 | 0.000000  | -1.447824 | -0.835902 | 0.000000  | -1.452242    | -0.838452 | 0.000000  |
| Ru | -0.641550    | 1.524974  | 1.825583  | -0.654448        | 1.522376  | 1.833593  | -0.669878 | 1.541061  | 1.827239  | -0.681904    | 1.538934  | 1.834988  |
| Ru | 0.641550     | 1.524974  | -1.825583 | 0.654448         | 1.522376  | -1.833593 | 0.669878  | 1.541061  | -1.827239 | 0.681904     | 1.538934  | -1.834988 |
| C  | 1.389740     | 2.867114  | 0.456839  | 1.401972         | 2.878408  | 0.465767  | 1.378728  | 2.905995  | 0.481155  | 1.388397     | 2.918801  | 0.489650  |
| C  | -1.389740    | 2.867114  | -0.456839 | -1.401972        | 2.878408  | -0.465767 | -1.378728 | 2.905995  | -0.481155 | -1.388397    | 2.918801  | -0.489650 |
| C  | 0.999891     | -1.318085 | -1.825583 | 0.991192         | -1.327956 | -1.833593 | 0.999659  | -1.350662 | -1.827239 | 0.991804     | -1.360013 | -1.834988 |
| C  | 1.641441     | -0.206888 | 1.825583  | 1.645640         | -0.194420 | 1.833593  | 1.669537  | -0.190399 | 1.827239  | 1.673708     | -0.178921 | 1.834988  |
| C  | 3.177863     | -0.230007 | -0.456839 | 3.193760         | -0.225061 | -0.465767 | 3.206030  | -0.258984 | -0.481155 | 3.221954     | -0.257013 | -0.489650 |
| C  | 1.788124     | -2.637107 | 0.456839  | 1.791789         | -2.653347 | 0.465767  | 1.827301  | -2.647011 | 0.481155  | 1.833557     | -2.661787 | 0.489650  |
| C  | -1.641441    | -0.206888 | -1.825583 | -1.645640        | -0.194420 | -1.833593 | -1.669537 | -0.190399 | -1.827239 | -1.673708    | -0.178921 | -1.834988 |
| C  | -0.999891    | -1.318085 | 1.825583  | -0.991192        | -1.327956 | 1.833593  | -0.999659 | -1.350662 | 1.827239  | -0.991804    | -1.360013 | 1.834988  |
| C  | -1.788124    | -2.637107 | -0.456839 | -1.791789        | -2.653347 | -0.465767 | -1.827301 | -2.647011 | -0.481155 | -1.833557    | -2.661787 | -0.489650 |
| C  | -3.177863    | -0.230007 | 0.456839  | -3.193760        | -0.225061 | 0.465767  | -3.206030 | -0.258984 | 0.481155  | -3.221954    | -0.257013 | 0.489650  |
| C  | -1.028833    | 1.594856  | 2.907161  | -1.046957        | 1.591451  | 2.913055  | -1.072863 | 1.620129  | 2.921936  | -1.089002    | 1.617815  | 2.927865  |
| C  | 1.028833     | 1.594856  | -2.907161 | 1.046957         | 1.591451  | -2.913055 | 1.072863  | 1.620129  | -2.921936 | 1.089002     | 1.617815  | -2.927865 |
| O  | 2.195803     | 3.628146  | 0.763559  | 2.209842         | 3.632993  | 0.781105  | 2.179558  | 3.692198  | 0.808498  | 2.188498     | 3.701110  | 0.825848  |
| O  | -2.195803    | 3.628146  | -0.763559 | -2.209842        | 3.632993  | -0.781105 | -2.179558 | 3.692198  | -0.808498 | -2.188498    | 3.701110  | -0.825848 |
| O  | 0.866769     | -1.688423 | -2.907161 | 0.854758         | -1.702417 | -2.913055 | 0.866641  | -1.739191 | -2.921936 | 0.856568     | -1.752011 | -2.927865 |
| O  | 1.895602     | 0.093568  | 2.907161  | 1.901715         | 0.110966  | 2.913055  | 1.939505  | 0.119062  | 2.921936  | 1.945570     | 0.134196  | 2.927865  |
| O  | 4.239968     | 0.087549  | -0.763559 | 4.251185         | 0.097283  | -0.781105 | 4.287316  | 0.041454  | -0.808498 | 4.299504     | 0.044740  | -0.825848 |
| O  | 2.044164     | -3.715694 | 0.763559  | 2.041344         | -3.730276 | 0.781105  | 2.107758  | -3.733652 | 0.808498  | 2.111006     | -3.745850 | 0.825848  |
| O  | -1.895602    | 0.093568  | -2.907161 | -1.901715        | 0.110966  | -2.913055 | -1.939505 | 0.119062  | -2.921936 | -1.945570    | 0.134196  | -2.927865 |
| O  | -0.866769    | -1.688423 | 2.907161  | -0.854758        | -1.702417 | 2.913055  | -0.866641 | -1.739191 | 2.921936  | -0.856568    | -1.752011 | 2.927865  |
| O  | -2.044164    | -3.715694 | -0.763559 | -2.041344        | -3.730276 | -0.781105 | -2.107758 | -3.733652 | -0.808498 | -2.111006    | -3.745850 | -0.825848 |
| O  | -4.239968    | 0.087549  | 0.763559  | -4.251185        | 0.097283  | 0.781105  | -4.287316 | 0.041454  | 0.808498  | -4.299504    | 0.044740  | 0.825848  |

|        |  |  |  |  |
|--------|--|--|--|--|
| O<br>O |  |  |  |  |
|--------|--|--|--|--|

Table S2 Coordinates of Ru<sub>3</sub>(CO)<sub>12</sub> (12-2) C<sub>2v</sub>

|    | MPW1PW91/SDD |           |           | MPW1PW91/LANL2DZ |           |           | BP86/SDD  |           |           | BP86/LANL2DZ |           |           |
|----|--------------|-----------|-----------|------------------|-----------|-----------|-----------|-----------|-----------|--------------|-----------|-----------|
| Ru | 0.000000     | -1.394434 | -0.838898 | 0.000000         | -1.406249 | -0.837586 | 0.000000  | -1.414913 | -0.854055 | 0.000000     | -1.427540 | -0.853620 |
| Ru | 0.000000     | 1.394434  | -0.838898 | 0.000000         | 1.406249  | -0.837586 | 0.000000  | 1.414913  | -0.854055 | 0.000000     | 1.427540  | -0.853620 |
| Ru | 0.000000     | 0.000000  | 1.638186  | 0.000000         | 0.000000  | 1.634545  | 0.000000  | 0.000000  | 1.668342  | 0.000000     | 0.000000  | 1.665605  |
| C  | -1.502811    | 0.000000  | -1.403258 | -1.508533        | 0.000000  | -1.412090 | -1.504809 | 0.000000  | -1.443193 | -1.512350    | 0.000000  | -1.449167 |
| C  | 1.502811     | 0.000000  | -1.403258 | 1.508533         | 0.000000  | -1.412090 | 1.504809  | 0.000000  | -1.443193 | 1.512350     | 0.000000  | -1.449167 |
| C  | 0.000000     | 1.455599  | 2.872257  | 0.000000         | 1.468338  | 2.879165  | 0.000000  | 1.453200  | 2.914999  | 0.000000     | 1.462888  | 2.923429  |
| C  | 1.423721     | 2.495262  | -0.149833 | 1.435644         | 2.508117  | -0.136630 | 1.426811  | 2.520537  | -0.157401 | 1.437879     | 2.533700  | -0.146425 |
| C  | -1.423721    | 2.495262  | -0.149833 | -1.435644        | 2.508117  | -0.136630 | -1.426811 | 2.520537  | -0.157401 | -1.437879    | 2.533700  | -0.146425 |
| C  | -1.933291    | 0.000000  | 1.479541  | -1.944685        | 0.000000  | 1.466570  | -1.942408 | 0.000000  | 1.500909  | -1.953279    | 0.000000  | 1.486951  |
| C  | 0.000000     | -1.455599 | 2.872257  | 0.000000         | -1.468338 | 2.879165  | 0.000000  | -1.453200 | 2.914999  | 0.000000     | -1.462888 | 2.923429  |
| C  | 1.933291     | 0.000000  | 1.479541  | 1.944685         | 0.000000  | 1.466570  | 1.942408  | 0.000000  | 1.500909  | 1.953279     | 0.000000  | 1.486951  |
| C  | -1.423721    | -2.495262 | -0.149833 | -1.435644        | -2.508117 | -0.136630 | -1.426811 | -2.520537 | -0.157401 | -1.437879    | -2.533700 | -0.146425 |
| C  | 0.000000     | 2.148712  | -2.592219 | 0.000000         | 2.175711  | -2.601361 | 0.000000  | 2.197775  | -2.600041 | 0.000000     | 2.223262  | -2.608349 |
| C  | 1.423721     | -2.495262 | -0.149833 | 1.435644         | -2.508117 | -0.136630 | 1.426811  | -2.520537 | -0.157401 | 1.437879     | -2.533700 | -0.146425 |
| C  | 0.000000     | -2.148712 | -2.592219 | 0.000000         | -2.175711 | -2.601361 | 0.000000  | -2.197775 | -2.600041 | 0.000000     | -2.223262 | -2.608349 |
| O  | -2.587803    | 0.000000  | -1.843314 | -2.588574        | 0.000000  | -1.859497 | -2.597577 | 0.000000  | -1.907611 | -2.601502    | 0.000000  | -1.917503 |
| O  | 2.587803     | 0.000000  | -1.843314 | 2.588574         | 0.000000  | -1.859497 | 2.597577  | 0.000000  | -1.907611 | 2.601502     | 0.000000  | -1.917503 |
| O  | 0.000000     | 2.317709  | 3.632820  | 0.000000         | 2.335337  | 3.633095  | 0.000000  | 2.319086  | 3.699613  | 0.000000     | 2.331468  | 3.704087  |
| O  | 2.240001     | 3.211839  | 0.224696  | 2.249849         | 3.222955  | 0.244683  | 2.247199  | 3.262149  | 0.217091  | 2.256869     | 3.273826  | 0.233020  |
| O  | -2.240001    | 3.211839  | 0.224696  | -2.249849        | 3.222955  | 0.244683  | -2.247199 | 3.262149  | 0.217091  | -2.256869    | 3.273826  | 0.233020  |
| O  | -3.081236    | 0.000000  | 1.461242  | -3.092289        | 0.000000  | 1.443273  | -3.108863 | 0.000000  | 1.486704  | -3.119400    | 0.000000  | 1.467756  |
| O  | 0.000000     | -2.317709 | 3.632820  | 0.000000         | -2.335337 | 3.633095  | 0.000000  | -2.319086 | 3.699613  | 0.000000     | -2.331468 | 3.704087  |
| O  | 3.081236     | 0.000000  | 1.461242  | 3.092289         | 0.000000  | 1.443273  | 3.108863  | 0.000000  | 1.486704  | 3.119400     | 0.000000  | 1.467756  |
| O  | -2.240001    | -3.211839 | 0.224696  | -2.249849        | -3.222955 | 0.244683  | -2.247199 | -3.262149 | 0.217091  | -2.256869    | -3.273826 | 0.233020  |
| O  | 0.000000     | 2.633950  | -3.633703 | 0.000000         | 2.668245  | -3.638778 | 0.000000  | 2.715995  | -3.646931 | 0.000000     | 2.749066  | -3.650893 |
| O  | 2.240001     | -3.211839 | 0.224696  | 2.249849         | -3.222955 | 0.244683  | 2.247199  | -3.262149 | 0.217091  | 2.256869     | -3.273826 | 0.233020  |
| O  | 0.000000     | -2.633950 | -3.633703 | 0.000000         | -2.668245 | -3.638778 | 0.000000  | -2.715995 | -3.646931 | 0.000000     | -2.749066 | -3.650893 |

Table S3 Coordinates of Ru<sub>3</sub>(CO)<sub>12</sub> (12-3) *D*<sub>3h</sub>

|    | MPW1PW91/SDD |           |           | MPW1PW91/LANL2DZ |           |           | BP86/SDD  |           |           | BP86/LANL2DZ |           |           |
|----|--------------|-----------|-----------|------------------|-----------|-----------|-----------|-----------|-----------|--------------|-----------|-----------|
| Ru | 0.000000     | 1.654828  | 0.000000  | 0.000000         | 1.658462  | 0.000000  | 0.000000  | 1.680913  | 0.000000  | 0.000000     | 1.685336  | 0.000000  |
| Ru | -1.433123    | -0.827414 | 0.000000  | -1.436270        | -0.829231 | 0.000000  | -1.455714 | -0.840457 | 0.000000  | -1.459544    | -0.842668 | 0.000000  |
| Ru | 1.433123     | -0.827414 | 0.000000  | 1.436270         | -0.829231 | 0.000000  | 1.455714  | -0.840457 | 0.000000  | 1.459544     | -0.842668 | 0.000000  |
| C  | 0.000000     | 1.627724  | 1.936359  | 0.000000         | 1.624690  | 1.947977  | 0.000000  | 1.647671  | 1.947182  | 0.000000     | 1.644280  | 1.958643  |
| C  | 0.000000     | 1.627724  | -1.936359 | 0.000000         | 1.624690  | -1.947977 | 0.000000  | 1.647671  | -1.947182 | 0.000000     | 1.644280  | -1.958643 |
| C  | -1.490565    | 2.837585  | 0.000000  | -1.506146        | 2.845995  | 0.000000  | -1.489476 | 2.876985  | 0.000000  | -1.503606    | 2.885929  | 0.000000  |
| C  | 1.490565     | 2.837585  | 0.000000  | 1.506146         | 2.845995  | 0.000000  | 1.489476  | 2.876985  | 0.000000  | 1.503606     | 2.885929  | 0.000000  |
| C  | -1.409651    | -0.813862 | -1.936359 | -1.407023        | -0.812345 | -1.947977 | -1.426925 | -0.823836 | -1.947182 | -1.423988    | -0.822140 | -1.958643 |
| C  | -1.409651    | -0.813862 | 1.936359  | -1.407023        | -0.812345 | 1.947977  | -1.426925 | -0.823836 | 1.947182  | -1.423988    | -0.822140 | 1.958643  |
| C  | -3.202703    | -0.127925 | 0.000000  | -3.217777        | -0.118637 | 0.000000  | -3.236280 | -0.148568 | 0.000000  | -3.251090    | -0.140803 | 0.000000  |
| C  | -1.712138    | -2.709659 | 0.000000  | -1.711631        | -2.727358 | 0.000000  | -1.746804 | -2.728417 | 0.000000  | -1.747485    | -2.745125 | 0.000000  |
| C  | 1.409651     | -0.813862 | -1.936359 | 1.407023         | -0.812345 | -1.947977 | 1.426925  | -0.823836 | -1.947182 | 1.423988     | -0.822140 | -1.958643 |
| C  | 1.409651     | -0.813862 | 1.936359  | 1.407023         | -0.812345 | 1.947977  | 1.426925  | -0.823836 | 1.947182  | 1.423988     | -0.822140 | 1.958643  |
| C  | 1.712138     | -2.709659 | 0.000000  | 1.711631         | -2.727358 | 0.000000  | 1.746804  | -2.728417 | 0.000000  | 1.747485     | -2.745125 | 0.000000  |
| C  | 3.202703     | -0.127925 | 0.000000  | 3.217777         | -0.118637 | 0.000000  | 3.236280  | -0.148568 | 0.000000  | 3.251090     | -0.140803 | 0.000000  |
| O  | 0.000000     | 1.777181  | 3.076252  | 0.000000         | 1.774618  | 3.087578  | 0.000000  | 1.807182  | 3.104233  | 0.000000     | 1.804878  | 3.115303  |
| O  | 0.000000     | 1.777181  | -3.076252 | 0.000000         | 1.774618  | -3.087578 | 0.000000  | 1.807182  | -3.104233 | 0.000000     | 1.804878  | -3.115303 |
| O  | -2.370791    | 3.578453  | 0.000000  | -2.391108        | 3.580146  | 0.000000  | -2.372608 | 3.643281  | 0.000000  | -2.390356    | 3.647031  | 0.000000  |
| O  | 2.370791     | 3.578453  | 0.000000  | 2.391108         | 3.580146  | 0.000000  | 2.372608  | 3.643281  | 0.000000  | 2.390356     | 3.647031  | 0.000000  |
| O  | -1.539083    | -0.888590 | -3.076252 | -1.536864        | -0.887309 | -3.087578 | -1.565065 | -0.903591 | -3.104233 | -1.563070    | -0.902439 | -3.115303 |
| O  | -1.539083    | -0.888590 | 3.076252  | -1.536864        | -0.887309 | 3.087578  | -1.565065 | -0.903591 | 3.104233  | -1.563070    | -0.902439 | 3.115303  |
| O  | -4.284426    | 0.263939  | 0.000000  | -4.296052        | 0.280687  | 0.000000  | -4.341478 | 0.233098  | 0.000000  | -4.353600    | 0.246594  | 0.000000  |
| O  | -1.913635    | -3.842391 | 0.000000  | -1.904943        | -3.860834 | 0.000000  | -1.968870 | -3.876379 | 0.000000  | -1.963243    | -3.893625 | 0.000000  |
| O  | 1.539083     | -0.888590 | -3.076252 | 1.536864         | -0.887309 | -3.087578 | 1.565065  | -0.903591 | -3.104233 | 1.563070     | -0.902439 | -3.115303 |
| O  | 1.539083     | -0.888590 | 3.076252  | 1.536864         | -0.887309 | 3.087578  | 1.565065  | -0.903591 | 3.104233  | 1.563070     | -0.902439 | 3.115303  |
| O  | 1.913635     | -3.842391 | 0.000000  | 1.904943         | -3.860834 | 0.000000  | 1.968870  | -3.876379 | 0.000000  | 1.963243     | -3.893625 | 0.000000  |
| O  | 4.284426     | 0.263939  | 0.000000  | 4.296052         | 0.280687  | 0.000000  | 4.341478  | 0.233098  | 0.000000  | 4.353600     | 0.246594  | 0.000000  |

Table S4 Coordinates of Ru<sub>3</sub>(CO)<sub>12</sub> (12-4) *D*<sub>3h</sub>

|    | MPW1PW91/SDD |           |           | MPW1PW91/LANL2DZ |           |           | BP86/SDD  |           |           | BP86/LANL2DZ |           |           |
|----|--------------|-----------|-----------|------------------|-----------|-----------|-----------|-----------|-----------|--------------|-----------|-----------|
| Ru | 0.000000     | 1.665481  | 0.000000  | 0.000000         | 1.682852  | 0.000000  | 0.000000  | 1.692789  | 0.000000  | 0.000000     | 1.710301  | 0.000000  |
| Ru | -1.442349    | -0.832741 | 0.000000  | -1.457392        | -0.841426 | 0.000000  | -1.465998 | -0.846395 | 0.000000  | -1.481164    | -0.855151 | 0.000000  |
| Ru | 1.442349     | -0.832741 | 0.000000  | 1.457392         | -0.841426 | 0.000000  | 1.465998  | -0.846395 | 0.000000  | 1.481164     | -0.855151 | 0.000000  |
| C  | 2.084859     | 1.203694  | 0.000000  | 2.099770         | 1.212303  | 0.000000  | 2.091944  | 1.207784  | 0.000000  | 2.107205     | 1.216595  | 0.000000  |
| C  | 0.000000     | -2.407388 | 0.000000  | 0.000000         | -2.424605 | 0.000000  | 0.000000  | -2.415569 | 0.000000  | 0.000000     | -2.433190 | 0.000000  |
| C  | -2.084859    | 1.203694  | 0.000000  | -2.099770        | 1.212303  | 0.000000  | -2.091944 | 1.207784  | 0.000000  | -2.107205    | 1.216595  | 0.000000  |
| C  | 0.000000     | 1.772623  | 1.939810  | 0.000000         | 1.772763  | 1.951450  | 0.000000  | 1.804472  | 1.947110  | 0.000000     | 1.802841  | 1.958101  |
| C  | 0.000000     | 1.772623  | -1.939810 | 0.000000         | 1.772763  | -1.951450 | 0.000000  | 1.804472  | -1.947110 | 0.000000     | 1.802841  | -1.958101 |
| C  | -1.535137    | -0.886312 | -1.939810 | -1.535258        | -0.886381 | -1.951450 | -1.562719 | -0.902236 | -1.947110 | -1.561306    | -0.901421 | -1.958101 |
| C  | -1.535137    | -0.886312 | 1.939810  | -1.535258        | -0.886381 | 1.951450  | -1.562719 | -0.902236 | 1.947110  | -1.561306    | -0.901421 | 1.958101  |
| C  | 1.535137     | -0.886312 | -1.939810 | 1.535258         | -0.886381 | -1.951450 | 1.562719  | -0.902236 | -1.947110 | 1.561306     | -0.901421 | -1.958101 |
| C  | 1.535137     | -0.886312 | 1.939810  | 1.535258         | -0.886381 | 1.951450  | 1.562719  | -0.902236 | 1.947110  | 1.561306     | -0.901421 | 1.958101  |
| C  | 0.000000     | 3.549322  | 0.000000  | 0.000000         | 3.579225  | 0.000000  | 0.000000  | 3.583547  | 0.000000  | 0.000000     | 3.611161  | 0.000000  |
| C  | -3.073803    | -1.774661 | 0.000000  | -3.099699        | -1.789612 | 0.000000  | -3.103443 | -1.791773 | 0.000000  | -3.127357    | -1.805581 | 0.000000  |
| C  | 3.073803     | -1.774661 | 0.000000  | 3.099699         | -1.789612 | 0.000000  | 3.103443  | -1.791773 | 0.000000  | 3.127357     | -1.805581 | 0.000000  |
| O  | 3.096144     | 1.787560  | 0.000000  | 3.109611         | 1.795335  | 0.000000  | 3.118818  | 1.800650  | 0.000000  | 3.132565     | 1.808587  | 0.000000  |
| O  | 0.000000     | -3.575120 | 0.000000  | 0.000000         | -3.590670 | 0.000000  | 0.000000  | -3.601301 | 0.000000  | 0.000000     | -3.617175 | 0.000000  |
| O  | -3.096144    | 1.787560  | 0.000000  | -3.109611        | 1.795335  | 0.000000  | -3.118818 | 1.800650  | 0.000000  | -3.132565    | 1.808587  | 0.000000  |
| O  | 0.000000     | 1.923630  | 3.076296  | 0.000000         | 1.905445  | 3.089865  | 0.000000  | 1.970844  | 3.100445  | 0.000000     | 1.949568  | 3.113693  |
| O  | 0.000000     | 1.923630  | -3.076296 | 0.000000         | 1.905445  | -3.089865 | 0.000000  | 1.970844  | -3.100445 | 0.000000     | 1.949568  | -3.113693 |
| O  | -1.665912    | -0.961815 | -3.076296 | -1.650163        | -0.952722 | -3.089865 | -1.706801 | -0.985422 | -3.100445 | -1.688376    | -0.974784 | -3.113693 |
| O  | -1.665912    | -0.961815 | 3.076296  | -1.650163        | -0.952722 | 3.089865  | -1.706801 | -0.985422 | 3.100445  | -1.688376    | -0.974784 | 3.113693  |
| O  | 1.665912     | -0.961815 | -3.076296 | 1.650163         | -0.952722 | -3.089865 | 1.706801  | -0.985422 | -3.100445 | 1.688376     | -0.974784 | -3.113693 |
| O  | 1.665912     | -0.961815 | 3.076296  | 1.650163         | -0.952722 | 3.089865  | 1.706801  | -0.985422 | 3.100445  | 1.688376     | -0.974784 | 3.113693  |
| O  | 0.000000     | 4.701072  | 0.000000  | 0.000000         | 4.730538  | 0.000000  | 0.000000  | 4.754308  | 0.000000  | 0.000000     | 4.781592  | 0.000000  |
| O  | -4.071248    | -2.350536 | 0.000000  | -4.096766        | -2.365269 | 0.000000  | -4.117352 | -2.377154 | 0.000000  | -4.140980    | -2.390796 | 0.000000  |
| O  | 4.071248     | -2.350536 | 0.000000  | 4.096766         | -2.365269 | 0.000000  | 4.117352  | -2.377154 | 0.000000  | 4.140980     | -2.390796 | 0.000000  |

Table S5 Coordinates of Ru<sub>3</sub>(CO)<sub>11</sub> (11-1)

|    | MPW1PW91/SDD |           |           | MPW1PW91/LANL2DZ |           |           | BP86/SDD  |           |           | BP86/LANL2DZ |           |           |
|----|--------------|-----------|-----------|------------------|-----------|-----------|-----------|-----------|-----------|--------------|-----------|-----------|
| Ru | 0.862712     | 1.181211  | -0.225674 | 0.844889         | 1.191555  | -0.239949 | 0.895498  | 1.203339  | -0.227125 | 0.873575     | 1.216435  | -0.243209 |
| Ru | -1.629656    | -0.078751 | 0.111657  | -1.630559        | -0.095927 | 0.116780  | -1.642257 | -0.057079 | 0.109858  | -1.645753    | -0.079953 | 0.114461  |
| Ru | 0.797074     | -1.552827 | 0.288581  | 0.831757         | -1.548791 | 0.306272  | 0.781251  | -1.570645 | 0.284420  | 0.823036     | -1.566777 | 0.306076  |
| C  | 0.499440     | 1.612768  | 1.636954  | 0.493812         | 1.644548  | 1.633277  | 0.590018  | 1.642390  | 1.655808  | 0.586133     | 1.682341  | 1.649314  |
| C  | 0.974132     | 0.496849  | -2.038142 | 0.942450         | 0.478249  | -2.054761 | 0.955240  | 0.481743  | -2.036071 | 0.917528     | 0.456056  | -2.048339 |
| C  | 2.740424     | 1.569116  | -0.135059 | 2.735923         | 1.619812  | -0.180875 | 2.783836  | 1.575166  | -0.182657 | 2.769625     | 1.639648  | -0.239009 |
| C  | 0.274774     | 2.895025  | -0.778062 | 0.201455         | 2.893505  | -0.808201 | 0.328565  | 2.929036  | -0.785942 | 0.241579     | 2.924619  | -0.822618 |
| C  | -1.891704    | 0.377335  | -1.768870 | -1.918364        | 0.335616  | -1.783476 | -1.962802 | 0.463792  | -1.755676 | -1.995320    | 0.399576  | -1.774206 |
| C  | -0.995878    | -0.850667 | 1.782554  | -0.966554        | -0.836121 | 1.804094  | -0.927147 | -0.894290 | 1.754274  | -0.894118    | -0.864329 | 1.781551  |
| C  | -3.115565    | -1.268968 | 0.092500  | -3.108250        | -1.319939 | 0.129988  | -3.184394 | -1.187114 | 0.135463  | -3.176858    | -1.244744 | 0.186133  |
| C  | -2.547506    | 1.412849  | 0.851710  | -2.571143        | 1.404138  | 0.849829  | -2.491385 | 1.428211  | 0.948584  | -2.517850    | 1.419889  | 0.931474  |
| C  | -0.284531    | -2.105461 | -1.248199 | -0.270677        | -2.141487 | -1.214254 | -0.417875 | -2.123398 | -1.181628 | -0.390578    | -2.170341 | -1.142046 |
| C  | 1.821122     | -0.998297 | 1.814236  | 1.871283         | -0.944203 | 1.817921  | 1.918775  | -1.057712 | 1.752886  | 1.975382     | -0.990542 | 1.754202  |
| C  | 2.375644     | -2.142240 | -0.537562 | 2.417915         | -2.131428 | -0.539987 | 2.283319  | -2.277115 | -0.624670 | 2.334016     | -2.267777 | -0.616489 |
| O  | 0.334206     | 1.946782  | 2.722872  | 0.332889         | 1.987295  | 2.716542  | 0.459887  | 1.979122  | 2.764490  | 0.460510     | 2.032086  | 2.753859  |
| O  | 1.107030     | 0.136213  | -3.119569 | 1.066785         | 0.103332  | -3.131992 | 1.060706  | 0.104638  | -3.134662 | 1.016500     | 0.058903  | -3.140192 |
| O  | 3.854737     | 1.836961  | -0.060697 | 3.845544         | 1.906973  | -0.122962 | 3.919397  | 1.843077  | -0.140877 | 3.897601     | 1.937340  | -0.221688 |
| O  | -0.080120    | 3.927013  | -1.140071 | -0.191711        | 3.907674  | -1.179213 | -0.012683 | 3.982328  | -1.160241 | -0.142936    | 3.957365  | -1.210363 |
| O  | -2.157722    | 0.666229  | -2.850800 | -2.201187        | 0.610484  | -2.864142 | -2.276914 | 0.797826  | -2.831191 | -2.328754    | 0.709623  | -2.850399 |
| O  | -0.992248    | -1.268982 | 2.872795  | -0.954272        | -1.227923 | 2.903031  | -0.947872 | -1.333127 | 2.858294  | -0.898531    | -1.263718 | 2.899098  |
| O  | -4.037787    | -1.956135 | 0.061990  | -4.015959        | -2.025684 | 0.116887  | -4.158457 | -1.833871 | 0.135039  | -4.136897    | -1.910625 | 0.213909  |
| O  | -3.137561    | 2.277651  | 1.330620  | -3.164980        | 2.267856  | 1.324645  | -3.060604 | 2.300157  | 1.482417  | -3.093238    | 2.295092  | 1.452140  |
| O  | -0.774372    | -2.621390 | -2.157855 | -0.764109        | -2.678033 | -2.109489 | -0.945499 | -2.693774 | -2.062685 | -0.916640    | -2.763733 | -2.007725 |
| O  | 2.493653     | -0.750808 | 2.714985  | 2.549429         | -0.669247 | 2.705812  | 2.664133  | -0.850842 | 2.630660  | 2.727249     | -0.749029 | 2.616791  |
| O  | 3.336704     | -2.465249 | -1.088415 | 3.373206         | -2.442352 | -1.106354 | 3.201088  | -2.696949 | -1.220862 | 3.248265     | -2.674978 | -1.225709 |

**Table S6** Coordinates of Ru<sub>3</sub>(CO)<sub>11</sub> (11-2)

|    | MPW1PW91/SDD |           |           | MPW1PW91/LANL2DZ |           |           | BP86/SDD  |           |           | BP86/LANL2DZ |           |           |
|----|--------------|-----------|-----------|------------------|-----------|-----------|-----------|-----------|-----------|--------------|-----------|-----------|
| Ru | 1.232654     | -0.841004 | 0.000000  | 1.242470         | -0.831951 | 0.000000  | 1.258160  | -0.867431 | 0.000000  | 1.273239     | -0.849250 | 0.000000  |
| Ru | -0.150240    | 1.669376  | 0.000000  | -0.160984        | 1.672032  | 0.000000  | -0.130489 | 1.687350  | 0.000000  | -0.151153    | 1.691375  | 0.000000  |
| Ru | -1.548437    | -0.833957 | 0.000000  | -1.554260        | -0.854483 | 0.000000  | -1.560519 | -0.837847 | 0.000000  | -1.564880    | -0.865507 | 0.000000  |
| C  | 1.203521     | -0.802385 | 1.940937  | 1.215406         | -0.786825 | 1.953083  | 1.203282  | -0.848228 | 1.950314  | 1.223496     | -0.817861 | 1.961951  |
| C  | 1.203521     | -0.802385 | -1.940937 | 1.215406         | -0.786825 | -1.953083 | 1.203282  | -0.848228 | -1.950314 | 1.223496     | -0.817861 | -1.961951 |
| C  | 1.656759     | -2.705948 | 0.000000  | 1.698669         | -2.708575 | 0.000000  | 1.715925  | -2.730372 | 0.000000  | 1.754109     | -2.722702 | 0.000000  |
| C  | 2.973497     | -0.092156 | 0.000000  | 2.975371         | -0.036644 | 0.000000  | 3.001056  | -0.105823 | 0.000000  | 3.011332     | -0.050833 | 0.000000  |
| C  | -0.174203    | 1.635693  | -1.933105 | -0.177566        | 1.638883  | -1.945444 | -0.125407 | 1.649297  | -1.944570 | -0.147110    | 1.651101  | -1.956142 |
| C  | -0.174203    | 1.635693  | 1.933105  | -0.177566        | 1.638883  | 1.945444  | -0.125407 | 1.649297  | 1.944570  | -0.147110    | 1.651101  | 1.956142  |
| C  | -1.762756    | 2.665776  | 0.000000  | -1.829402        | 2.601049  | 0.000000  | -1.769416 | 2.658565  | 0.000000  | -1.837427    | 2.604929  | 0.000000  |
| C  | 1.250331     | 2.977826  | 0.000000  | 1.211599         | 3.034281  | 0.000000  | 1.236690  | 3.041128  | 0.000000  | 1.188771     | 3.092455  | 0.000000  |
| C  | -1.667601    | -0.816071 | -1.925945 | -1.654373        | -0.831617 | -1.938357 | -1.727469 | -0.786896 | -1.927858 | -1.700210    | -0.820098 | -1.941676 |
| C  | -1.667601    | -0.816071 | 1.925945  | -1.654373        | -0.831617 | 1.938357  | -1.727469 | -0.786896 | 1.927858  | -1.700210    | -0.820098 | 1.941676  |
| C  | -1.824011    | -2.671995 | 0.000000  | -1.801700        | -2.709175 | 0.000000  | -1.886081 | -2.678152 | 0.000000  | -1.868147    | -2.720925 | 0.000000  |
| O  | 1.312393     | -0.878496 | 3.081086  | 1.330598         | -0.860668 | 3.092502  | 1.293069  | -0.951303 | 3.108510  | 1.326425     | -0.913309 | 3.119474  |
| O  | 1.312393     | -0.878496 | -3.081086 | 1.330598         | -0.860668 | -3.092502 | 1.293069  | -0.951303 | -3.108510 | 1.326425     | -0.913309 | -3.119474 |
| O  | 1.953621     | -3.815655 | 0.000000  | 2.014281         | -3.812329 | 0.000000  | 2.053668  | -3.848324 | 0.000000  | 2.105131     | -3.835807 | 0.000000  |
| O  | 4.028553     | 0.365263  | 0.000000  | 4.016028         | 0.451482  | 0.000000  | 4.072077  | 0.362139  | 0.000000  | 4.070981     | 0.441099  | 0.000000  |
| O  | -0.198521    | 1.771652  | -3.075909 | -0.199515        | 1.776352  | -3.087669 | -0.127648 | 1.793948  | -3.104818 | -0.156148    | 1.798114  | -3.115694 |
| O  | -0.198521    | 1.771652  | 3.075909  | -0.199515        | 1.776352  | 3.087669  | -0.127648 | 1.793948  | 3.104818  | -0.156148    | 1.798114  | 3.115694  |
| O  | -2.731511    | 3.290615  | 0.000000  | -2.828615        | 3.174999  | 0.000000  | -2.763432 | 3.277946  | 0.000000  | -2.857255    | 3.179812  | 0.000000  |
| O  | 2.040270     | 3.815287  | 0.000000  | 1.970451         | 3.899130  | 0.000000  | 2.003053  | 3.925122  | 0.000000  | 1.924875     | 4.001030  | 0.000000  |
| O  | -1.898993    | -0.871314 | -3.051701 | -1.866456        | -0.884376 | -3.067514 | -2.022781 | -0.808936 | -3.059886 | -1.961346    | -0.854238 | -3.081065 |
| O  | -1.898993    | -0.871314 | 3.051701  | -1.866456        | -0.884376 | 3.067514  | -2.022781 | -0.808936 | 3.059886  | -1.961346    | -0.854238 | 3.081065  |
| O  | -1.920501    | -3.824461 | 0.000000  | -1.867248        | -3.863054 | 0.000000  | -2.019228 | -3.845964 | 0.000000  | -1.976971    | -3.890571 | 0.000000  |



Table S7 Coordinates of Ru<sub>3</sub>(CO)<sub>11</sub> (11-3)

|    | MPW1PW91/SDD |           |           | MPW1PW91/LANL2DZ |           |           | BP86/SDD  |           |           | BP86/LANL2DZ |           |           |
|----|--------------|-----------|-----------|------------------|-----------|-----------|-----------|-----------|-----------|--------------|-----------|-----------|
| Ru | 0.000000     | 1.655460  | -0.898303 | 0.000000         | 1.670883  | -0.908854 | 0.000000  | 1.659519  | -0.901014 | 0.000000     | 1.676970  | -0.913238 |
| Ru | 0.000000     | -1.655460 | -0.898303 | 0.000000         | -1.670883 | -0.908854 | 0.000000  | -1.659519 | -0.901014 | 0.000000     | -1.676970 | -0.913238 |
| Ru | 0.000000     | 0.000000  | 1.424764  | 0.000000         | 0.000000  | 1.437316  | 0.000000  | 0.000000  | 1.461637  | 0.000000     | 0.000000  | 1.471186  |
| C  | -1.934146    | 1.621379  | -1.079151 | -1.946433        | 1.630756  | -1.067653 | -1.934383 | 1.602666  | -1.119359 | -1.947325    | 1.614539  | -1.103584 |
| C  | 1.934146     | 1.621379  | -1.079151 | 1.946433         | 1.630756  | -1.067653 | 1.934383  | 1.602666  | -1.119359 | 1.947325     | 1.614539  | -1.103584 |
| C  | 0.000000     | 2.088916  | 1.066371  | 0.000000         | 2.097458  | 1.076540  | 0.000000  | 2.102525  | 1.075258  | 0.000000     | 2.112858  | 1.082151  |
| C  | 0.000000     | 3.349970  | -1.709152 | 0.000000         | 3.362771  | -1.754282 | 0.000000  | 3.363189  | -1.713223 | 0.000000     | 3.377667  | -1.755874 |
| C  | 1.934146     | -1.621379 | -1.079151 | 1.946433         | -1.630756 | -1.067653 | 1.934383  | -1.602666 | -1.119359 | 1.947325     | -1.614539 | -1.103584 |
| C  | -1.934146    | -1.621379 | -1.079151 | -1.946433        | -1.630756 | -1.067653 | -1.934383 | -1.602666 | -1.119359 | -1.947325    | -1.614539 | -1.103584 |
| C  | 0.000000     | -2.088916 | 1.066371  | 0.000000         | -2.097458 | 1.076540  | 0.000000  | -2.102525 | 1.075258  | 0.000000     | -2.112858 | 1.082151  |
| C  | 0.000000     | -3.349970 | -1.709152 | 0.000000         | -3.362771 | -1.754282 | 0.000000  | -3.363189 | -1.713223 | 0.000000     | -3.377667 | -1.755874 |
| C  | 1.938277     | 0.000000  | 1.467073  | 1.950196         | 0.000000  | 1.471403  | 1.947104  | 0.000000  | 1.507789  | 1.958067     | 0.000000  | 1.508629  |
| C  | -1.938277    | 0.000000  | 1.467073  | -1.950196        | 0.000000  | 1.471403  | -1.947104 | 0.000000  | 1.507789  | -1.958067    | 0.000000  | 1.508629  |
| C  | 0.000000     | 0.000000  | 3.318335  | 0.000000         | 0.000000  | 3.346734  | 0.000000  | 0.000000  | 3.359705  | 0.000000     | 0.000000  | 3.382157  |
| O  | -3.064919    | 1.638847  | -1.274399 | -3.080282        | 1.637836  | -1.242214 | -3.077019 | 1.615927  | -1.356146 | -3.094498    | 1.618269  | -1.314582 |
| O  | 3.064919     | 1.638847  | -1.274399 | 3.080282         | 1.637836  | -1.242214 | 3.077019  | 1.615927  | -1.356146 | 3.094498     | 1.618269  | -1.314582 |
| O  | 0.000000     | 3.103516  | 1.659100  | 0.000000         | 3.114848  | 1.660576  | 0.000000  | 3.129023  | 1.681821  | 0.000000     | 3.140711  | 1.682544  |
| O  | 0.000000     | 4.417676  | -2.144721 | 0.000000         | 4.424549  | -2.203038 | 0.000000  | 4.444757  | -2.164237 | 0.000000     | 4.453990  | -2.218485 |
| O  | 3.064919     | -1.638847 | -1.274399 | 3.080282         | -1.637836 | -1.242214 | 3.077019  | -1.615927 | -1.356146 | 3.094498     | -1.618269 | -1.314582 |
| O  | -3.064919    | -1.638847 | -1.274399 | -3.080282        | -1.637836 | -1.242214 | -3.077019 | -1.615927 | -1.356146 | -3.094498    | -1.618269 | -1.314582 |
| O  | 0.000000     | -3.103516 | 1.659100  | 0.000000         | -3.114848 | 1.660576  | 0.000000  | -3.129023 | 1.681821  | 0.000000     | -3.140711 | 1.682544  |
| O  | 0.000000     | -4.417676 | -2.144721 | 0.000000         | -4.424549 | -2.203038 | 0.000000  | -4.444757 | -2.164237 | 0.000000     | -4.453990 | -2.218485 |
| O  | 3.080443     | 0.000000  | 1.578883  | 3.092535         | 0.000000  | 1.576055  | 3.106660  | 0.000000  | 1.632939  | 3.117840     | 0.000000  | 1.627434  |
| O  | -3.080443    | 0.000000  | 1.578883  | -3.092535        | 0.000000  | 1.576055  | -3.106660 | 0.000000  | 1.632939  | -3.117840    | 0.000000  | 1.627434  |
| O  | 0.000000     | 0.000000  | 4.468470  | 0.000000         | 0.000000  | 4.496239  | 0.000000  | 0.000000  | 4.529252  | 0.000000     | 0.000000  | 4.551215  |

Table S8 Coordinates of Ru<sub>3</sub>(CO)<sub>11</sub> (11-4)

|    | MPW1PW91/SDD |           |           | MPW1PW91/LANL2DZ |           |           | BP86/SDD  |           |           | BP86/LANL2DZ |           |           |
|----|--------------|-----------|-----------|------------------|-----------|-----------|-----------|-----------|-----------|--------------|-----------|-----------|
| Ru | 1.628880     | 0.000000  | -0.027834 | 0.029027         | 1.636040  | 0.000000  | 0.025011  | 1.657729  | 0.000000  | 1.668464     | 0.000000  | -0.022030 |
| Ru | -0.862841    | -1.320431 | 0.037405  | -0.040001        | -0.867300 | 1.322493  | -0.037128 | -0.875631 | 1.341428  | -0.880403    | -1.345131 | 0.037697  |
| Ru | -0.862841    | 1.320431  | 0.037405  | -0.040001        | -0.867300 | -1.322493 | -0.037128 | -0.875631 | -1.341428 | -0.880403    | 1.345131  | 0.037697  |
| C  | 2.733185     | 0.000000  | 1.592776  | -1.616101        | 2.736857  | 0.000000  | -1.588322 | 2.780570  | 0.000000  | 2.781783     | 0.000000  | 1.618181  |
| C  | 2.602520     | 1.456779  | -0.799544 | 0.796503         | 2.620803  | -1.471315 | 0.799854  | 2.638095  | -1.460006 | 2.663645     | 1.472753  | -0.787637 |
| C  | 2.602520     | -1.456779 | -0.799544 | 0.796503         | 2.620803  | 1.471315  | 0.799854  | 2.638095  | 1.460006  | 2.663644     | -1.472753 | -0.787637 |
| C  | -0.731422    | -2.649349 | 1.398551  | -1.415378        | -0.770789 | 2.657933  | -1.395125 | -0.744024 | 2.679676  | -0.821504    | -2.679751 | 1.418428  |
| C  | -0.497164    | -2.685856 | -1.242898 | 1.232817         | -0.465545 | 2.702399  | 1.246534  | -0.517295 | 2.713458  | -0.464389    | -2.740127 | -1.221055 |
| C  | -2.763496    | -1.405672 | -0.160869 | 0.203768         | -2.780486 | 1.395711  | 0.154379  | -2.784676 | 1.415753  | -2.796525    | -1.401609 | -0.229064 |
| C  | -0.731422    | 2.649349  | 1.398551  | -1.415378        | -0.770789 | -2.657933 | -1.395125 | -0.744024 | -2.679676 | -0.821504    | 2.679751  | 1.418428  |
| C  | -2.763496    | 1.405672  | -0.160869 | 0.203768         | -2.780486 | -1.395711 | 0.154379  | -2.784676 | -1.415753 | -2.796525    | 1.401609  | -0.229064 |
| C  | -0.497163    | 2.685856  | -1.242898 | 1.232817         | -0.465545 | -2.702399 | 1.246534  | -0.517295 | -2.713458 | -0.464389    | 2.740127  | -1.221055 |
| C  | 0.112757     | 0.000000  | 1.488546  | -1.505901        | 0.098841  | 0.000000  | -1.489136 | 0.117494  | 0.000000  | 0.102495     | 0.000000  | 1.503517  |
| C  | 0.307969     | 0.000000  | -1.546859 | 1.565437         | 0.329487  | 0.000000  | 1.549482  | 0.307389  | 0.000000  | 0.341642     | 0.000000  | -1.570172 |
| O  | 3.422099     | 0.000000  | 2.508583  | -2.531867        | 3.424856  | 0.000000  | -2.508393 | 3.494996  | 0.000000  | 3.493495     | 0.000000  | 2.539557  |
| O  | 3.172043     | 2.332387  | -1.279158 | 1.272344         | 3.191891  | -2.347276 | 1.284835  | 3.224014  | -2.346709 | 3.256224     | 2.357097  | -1.267475 |
| O  | 3.172042     | -2.332387 | -1.279158 | 1.272344         | 3.191891  | 2.347276  | 1.284835  | 3.224014  | 2.346709  | 3.256224     | -2.357097 | -1.267475 |
| O  | -0.674216    | -3.422679 | 2.244508  | -2.267348        | -0.737674 | 3.425477  | -2.252067 | -0.693786 | 3.470428  | -0.822740    | -3.458730 | 2.287187  |
| O  | -0.298023    | -3.497440 | -2.030424 | 2.009238         | -0.244243 | 3.518453  | 2.046547  | -0.329065 | 3.542981  | -0.241058    | -3.580618 | -1.999972 |
| O  | -3.892483    | -1.593891 | -0.270793 | 0.342261         | -3.904572 | 1.591771  | 0.259786  | -3.931630 | 1.615649  | -3.936433    | -1.609531 | -0.381345 |
| O  | -0.674216    | 3.422679  | 2.244508  | -2.267348        | -0.737674 | -3.425477 | -2.252067 | -0.693786 | -3.470428 | -0.822740    | 3.458730  | 2.287187  |
| O  | -3.892483    | 1.593892  | -0.270793 | 0.342261         | -3.904572 | -1.591771 | 0.259786  | -3.931630 | -1.615649 | -3.936433    | 1.609531  | -0.381345 |
| O  | -0.298023    | 3.497440  | -2.030424 | 2.009238         | -0.244243 | -3.518453 | 2.046547  | -0.329065 | -3.542981 | -0.241058    | 3.580618  | -1.999972 |
| O  | 0.084207     | 0.000000  | 2.676463  | -2.690263        | 0.077147  | 0.000000  | -2.694286 | 0.069388  | 0.000000  | 0.058901     | 0.000000  | 2.705288  |
| O  | 0.130372     | 0.000000  | -2.715384 | 2.730371         | 0.149409  | 0.000000  | 2.732843  | 0.118742  | 0.000000  | 0.152219     | 0.000000  | -2.749783 |

**Table S9** Coordinates of Ru<sub>3</sub>(CO)<sub>10</sub> (10-1)

|    | MPW1PW91/SDD |           |           | MPW1PW91/LANL2DZ |           |           | BP86/SDD  |           |           | BP86/LANL2DZ |           |           |
|----|--------------|-----------|-----------|------------------|-----------|-----------|-----------|-----------|-----------|--------------|-----------|-----------|
| Ru | 0.486943     | 1.542492  | 0.257078  | 0.145103         | 1.641515  | 0.271127  | 0.734004  | 1.454206  | 0.250564  | 0.599699     | 1.531759  | 0.251506  |
| Ru | -1.499062    | -0.339520 | -0.071334 | -1.398116        | -0.673370 | -0.081339 | -1.551865 | -0.092065 | -0.058977 | -1.540416    | -0.225816 | -0.055509 |
| Ru | 1.103827     | -1.180004 | -0.138834 | 1.379394         | -0.881036 | -0.163937 | 0.857156  | -1.366584 | -0.144022 | 1.003168     | -1.303168 | -0.172437 |
| C  | 0.046191     | 0.712920  | -1.411515 | -0.282249        | 0.734247  | -1.400249 | 0.367447  | 0.590937  | -1.436348 | 0.230268     | 0.626554  | -1.441790 |
| C  | -0.161623    | 3.305799  | -0.133312 | -0.959541        | 3.197725  | -0.085388 | 0.453749  | 3.290831  | -0.210025 | 0.208091     | 3.354996  | -0.230122 |
| C  | 2.255092     | 2.179284  | 0.030606  | 1.710939         | 2.636825  | -0.128607 | 2.610984  | 1.811014  | 0.237495  | 2.464098     | 1.984098  | 0.219236  |
| C  | -1.605188    | 1.194924  | 1.181915  | -1.749716        | 0.703417  | 1.318858  | -1.375059 | 1.566487  | 1.061449  | -1.516005    | 1.483361  | 1.057281  |
| C  | -2.926401    | 0.213225  | -1.219478 | -3.079800        | -0.384601 | -1.011709 | -2.801880 | 0.597493  | -1.313522 | -2.897628    | 0.328933  | -1.281560 |
| C  | -2.598111    | -1.351199 | 1.119792  | -1.969806        | -2.031843 | 1.176111  | -2.938568 | -0.762931 | 1.049288  | -2.821525    | -1.036714 | 1.112585  |
| C  | -0.985069    | -2.046923 | -0.908580 | -0.652545        | -2.086223 | -1.214918 | -1.242710 | -1.992350 | -0.698806 | -1.070896    | -2.068475 | -0.767579 |
| C  | 1.238721     | -0.203375 | 1.466105  | 1.302544         | 0.150131  | 1.422261  | 1.101180  | -0.408045 | 1.506221  | 1.002939     | -0.326090 | 1.500584  |
| C  | 1.355729     | -2.973533 | 0.367955  | 1.817652         | -2.648562 | 0.328079  | 0.983895  | -3.158946 | 0.447262  | 1.263731     | -3.098223 | 0.386736  |
| C  | 2.938704     | -1.063463 | -0.596966 | 3.212178         | -0.499415 | -0.491276 | 2.666163  | -1.500843 | -0.747569 | 2.871156     | -1.216306 | -0.616790 |
| O  | 0.222524     | 0.711590  | -2.577828 | -0.114316        | 0.820973  | -2.563930 | 0.481180  | 0.587652  | -2.626289 | 0.385092     | 0.633197  | -2.626091 |
| O  | -0.509473    | 4.362231  | -0.418013 | -1.576500        | 4.131491  | -0.336747 | 0.325780  | 4.405205  | -0.536291 | 0.013398     | 4.455209  | -0.569025 |
| O  | 3.320671     | 2.574179  | -0.149409 | 2.653583         | 3.226929  | -0.422578 | 3.752490  | 2.058655  | 0.194284  | 3.590375     | 2.292289  | 0.169840  |
| O  | -2.067783    | 1.850206  | 2.022567  | -2.240012        | 1.209635  | 2.238950  | -1.802956 | 2.340407  | 1.847578  | -2.041296    | 2.220193  | 1.816201  |
| O  | -3.780425    | 0.496952  | -1.932729 | -4.063870        | -0.277243 | -1.591853 | -3.565316 | 0.976728  | -2.112783 | -3.723279    | 0.618067  | -2.055284 |
| O  | -3.275433    | -1.944382 | 1.831203  | -2.321883        | -2.837450 | 1.912613  | -3.797062 | -1.149711 | 1.739547  | -3.617366    | -1.506831 | 1.824679  |
| O  | -1.133458    | -3.056379 | -1.464407 | -0.469312        | -2.963544 | -1.943422 | -1.675967 | -3.010643 | -1.119716 | -1.398097    | -3.096934 | -1.249581 |
| O  | 1.456214     | -0.055451 | 2.608090  | 1.500954         | 0.333976  | 2.564378  | 1.327749  | -0.352974 | 2.671812  | 1.180467     | -0.281390 | 2.675208  |
| O  | 1.540491     | -4.036486 | 0.772290  | 2.101608         | -3.683361 | 0.750739  | 1.095266  | -4.246758 | 0.863592  | 1.454583     | -4.176717 | 0.798692  |
| O  | 4.053746     | -1.004534 | -0.872166 | 4.322407         | -0.269278 | -0.685202 | 3.773815  | -1.609359 | -1.104930 | 4.011968     | -1.196453 | -0.868157 |

**Table S10** Coordinates of Ru<sub>3</sub>(CO)<sub>10</sub> (10-2)

|    | MPW1PW91/SDD |           |           | MPW1PW91/LANL2DZ |           |           | BP86/SDD  |           |           | BP86/LANL2DZ |           |           |
|----|--------------|-----------|-----------|------------------|-----------|-----------|-----------|-----------|-----------|--------------|-----------|-----------|
| Ru | 0.000000     | 0.000000  | 1.522580  | 0.000000         | 0.000000  | 1.496823  | 0.000000  | 0.000000  | 1.551999  | 0.000000     | 0.000000  | 1.552529  |
| Ru | -1.380189    | 0.318858  | -0.792694 | -1.406703        | 0.350110  | -0.806164 | -1.402114 | 0.271111  | -0.797139 | -1.424226    | 0.271475  | -0.804764 |
| Ru | 1.380189     | -0.318858 | -0.792694 | 1.406703         | -0.350110 | -0.806164 | 1.402114  | -0.271111 | -0.797139 | 1.424226     | -0.271475 | -0.804764 |
| C  | 1.987462     | 0.148605  | 1.333164  | 2.017570         | 0.125141  | 1.309910  | 1.997062  | 0.216651  | 1.321895  | 2.016461     | 0.212162  | 1.319620  |
| C  | 0.166208     | -1.360620 | 2.825719  | 0.130667         | -1.382387 | 2.811520  | 0.212743  | -1.347197 | 2.863898  | 0.201947     | -1.354367 | 2.876139  |
| C  | -0.166208    | 1.360620  | 2.825719  | -0.130667        | 1.382387  | 2.811520  | -0.212743 | 1.347197  | 2.863898  | -0.201947    | 1.354367  | 2.876139  |
| C  | 0.000000     | 1.594601  | -0.611578 | 0.000000         | 1.586394  | -0.414759 | 0.000000  | 1.579100  | -0.675837 | 0.000000     | 1.573982  | -0.600710 |
| C  | -2.933162    | 1.405092  | -0.758107 | -2.961708        | 1.447538  | -0.801673 | -2.952231 | 1.374035  | -0.757203 | -2.977779    | 1.384521  | -0.787691 |
| C  | -1.606503    | 0.160246  | -2.679897 | -1.499322        | 0.331198  | -2.719506 | -1.696111 | 0.049689  | -2.677073 | -1.654760    | 0.083131  | -2.707525 |
| C  | 0.000000     | -1.594601 | -0.611578 | 0.000000         | -1.586394 | -0.414759 | 0.000000  | -1.579100 | -0.675837 | 0.000000     | -1.573982 | -0.600710 |
| C  | 1.606503     | -0.160246 | -2.679897 | 1.499322         | -0.331198 | -2.719506 | 1.696111  | -0.049689 | -2.677073 | 1.654760     | -0.083131 | -2.707525 |
| C  | 2.933162     | -1.405092 | -0.758107 | 2.961708         | -1.447538 | -0.801673 | 2.952231  | -1.374035 | -0.757203 | 2.977779     | -1.384521 | -0.787691 |
| C  | -1.987462    | -0.148605 | 1.333164  | -2.017570        | -0.125141 | 1.309910  | -1.997062 | -0.216651 | 1.321895  | -2.016461    | -0.212162 | 1.319620  |
| O  | 3.042850     | 0.350790  | 1.782331  | 3.054281         | 0.329013  | 1.795746  | 3.062870  | 0.475751  | 1.766204  | 3.073615     | 0.468388  | 1.781624  |
| O  | 0.229796     | -2.189324 | 3.618094  | 0.180781         | -2.203686 | 3.610892  | 0.299978  | -2.186196 | 3.672274  | 0.283452     | -2.186561 | 3.691170  |
| O  | -0.229796    | 2.189324  | 3.618094  | -0.180781        | 2.203686  | 3.610892  | -0.299978 | 2.186196  | 3.672274  | -0.283452    | 2.186561  | 3.691170  |
| O  | 0.483845     | 2.657322  | -0.721511 | 0.502837         | 2.640405  | -0.538623 | 0.415509  | 2.690620  | -0.784110 | 0.404870     | 2.688091  | -0.716810 |
| O  | -3.839052    | 2.113939  | -0.770156 | -3.853450        | 2.173432  | -0.825638 | -3.875956 | 2.090977  | -0.769993 | -3.895337    | 2.108516  | -0.812235 |
| O  | -1.761485    | 0.108874  | -3.818016 | -1.603275        | 0.365286  | -3.863855 | -1.896573 | -0.042449 | -3.824864 | -1.821713    | 0.015052  | -3.861877 |
| O  | -0.483845    | -2.657322 | -0.721511 | -0.502837        | -2.640405 | -0.538623 | -0.415509 | -2.690620 | -0.784110 | -0.404870    | -2.688091 | -0.716810 |
| O  | 1.761485     | -0.108874 | -3.818016 | 1.603275         | -0.365286 | -3.863855 | 1.896573  | 0.042449  | -3.824864 | 1.821713     | -0.015052 | -3.861877 |
| O  | 3.839052     | -2.113939 | -0.770156 | 3.853450         | -2.173432 | -0.825638 | 3.875956  | -2.090977 | -0.769993 | 3.895337     | -2.108516 | -0.812235 |
| O  | -3.042850    | -0.350790 | 1.782331  | -3.054281        | -0.329013 | 1.795746  | -3.062870 | -0.475751 | 1.766204  | -3.073615    | -0.468388 | 1.781624  |

**Table S11** Coordinates of Ru<sub>3</sub>(CO)<sub>10</sub> (10-3)

|    | MPW1PW91/SDD |           |           | MPW1PW91/LANL2DZ |           |           | BP86/SDD  |           |           | BP86/LANL2DZ |           |           |
|----|--------------|-----------|-----------|------------------|-----------|-----------|-----------|-----------|-----------|--------------|-----------|-----------|
| Ru | -0.746400    | 0.009377  | 1.339929  | -0.748824        | 0.005697  | 1.344241  | -0.747561 | 0.012509  | 1.363557  | -0.751617    | 0.008596  | 1.369309  |
| Ru | -0.746400    | 0.009377  | -1.339929 | -0.748824        | 0.005697  | -1.344241 | -0.747561 | 0.012509  | -1.363557 | -0.751617    | 0.008596  | -1.369309 |
| Ru | 1.659908     | 0.262766  | 0.000000  | 1.670035         | 0.274010  | 0.000000  | 1.681841  | 0.231711  | 0.000000  | 1.693896     | 0.244209  | 0.000000  |
| C  | 0.000003     | 1.513489  | 0.000000  | -0.003546        | 1.533987  | 0.000000  | 0.031885  | 1.511808  | 0.000000  | 0.030629     | 1.529393  | 0.000000  |
| C  | -1.399455    | 1.375850  | 2.444593  | -1.416823        | 1.373165  | 2.457423  | -1.469800 | 1.373440  | 2.435944  | -1.475589    | 1.370870  | 2.456364  |
| C  | 0.187720     | -0.705796 | 2.838263  | 0.213855         | -0.695059 | 2.850087  | 0.196021  | -0.655462 | 2.888474  | 0.216382     | -0.656422 | 2.896427  |
| C  | -2.395127    | -0.983022 | 1.446158  | -2.412521        | -0.997561 | 1.445542  | -2.383392 | -1.004871 | 1.454506  | -2.406892    | -1.007629 | 1.451642  |
| C  | -1.399455    | 1.375850  | -2.444593 | -1.416823        | 1.373165  | -2.457423 | -1.469800 | 1.373440  | -2.435944 | -1.475589    | 1.370870  | -2.456364 |
| C  | -2.395127    | -0.983022 | -1.446158 | -2.412521        | -0.997561 | -1.445542 | -2.383392 | -1.004871 | -1.454506 | -2.406892    | -1.007629 | -1.451642 |
| C  | 0.187720     | -0.705796 | -2.838263 | 0.213855         | -0.695059 | -2.850087 | 0.196021  | -0.655462 | -2.888474 | 0.216382     | -0.656422 | -2.896427 |
| C  | 0.793199     | -1.419919 | 0.000000  | 0.762766         | -1.413502 | 0.000000  | 0.800827  | -1.459382 | 0.000000  | 0.774514     | -1.451369 | 0.000000  |
| C  | 2.939215     | 0.035031  | -1.402982 | 2.953535         | 0.028121  | -1.408771 | 2.971259  | 0.051257  | -1.410624 | 2.984646     | 0.044918  | -1.418998 |
| C  | 2.939215     | 0.035031  | 1.402982  | 2.953535         | 0.028121  | 1.408771  | 2.971259  | 0.051257  | 1.410624  | 2.984646     | 0.044918  | 1.418998  |
| O  | 0.107318     | 2.697363  | 0.000000  | 0.077209         | 2.715639  | 0.000000  | 0.111340  | 2.717083  | 0.000000  | 0.088553     | 2.731716  | 0.000000  |
| O  | -1.811772    | 2.235812  | 3.085729  | -1.834051        | 2.230022  | 3.098381  | -1.927355 | 2.242906  | 3.069234  | -1.930349    | 2.238061  | 3.093760  |
| O  | 0.724831     | -1.172979 | 3.740880  | 0.758643         | -1.154190 | 3.751453  | 0.731216  | -1.106268 | 3.824505  | 0.757591     | -1.106960 | 3.828456  |
| O  | -3.361174    | -1.583627 | 1.608887  | -3.374983        | -1.602018 | 1.611275  | -3.352376 | -1.637129 | 1.617967  | -3.377047    | -1.636238 | 1.618941  |
| O  | -1.811772    | 2.235812  | -3.085729 | -1.834051        | 2.230022  | -3.098381 | -1.927355 | 2.242906  | -3.069234 | -1.930349    | 2.238061  | -3.093760 |
| O  | -3.361174    | -1.583627 | -1.608887 | -3.374983        | -1.602018 | -1.611275 | -3.352376 | -1.637129 | -1.617967 | -3.377047    | -1.636238 | -1.618941 |
| O  | 0.724831     | -1.172979 | -3.740880 | 0.758643         | -1.154190 | -3.751453 | 0.731216  | -1.106268 | -3.824505 | 0.757591     | -1.106960 | -3.828456 |
| O  | 0.860917     | -2.594074 | 0.000000  | 0.860109         | -2.585595 | 0.000000  | 0.830684  | -2.651059 | 0.000000  | 0.831099     | -2.641929 | 0.000000  |
| O  | 3.707736     | -0.131666 | -2.242951 | 3.719429         | -0.150378 | -2.248343 | 3.766193  | -0.081461 | -2.258830 | 3.774819     | -0.101670 | -2.268875 |
| O  | 3.707736     | -0.131666 | 2.242951  | 3.719429         | -0.150378 | 2.248343  | 3.766193  | -0.081461 | 2.258830  | 3.774819     | -0.101670 | 2.268875  |

**Table S12** Coordinates of Ru<sub>3</sub>(CO)<sub>10</sub> (10-4)

|    | MPW1PW91/SDD |           |           | MPW1PW91/LANL2DZ |           |           | BP86/SDD  |           |           | BP86/LANL2DZ |           |           |
|----|--------------|-----------|-----------|------------------|-----------|-----------|-----------|-----------|-----------|--------------|-----------|-----------|
| Ru | 0.000000     | 1.402670  | -0.804171 | 0.000000         | 1.417604  | -0.820689 | 0.000000  | 1.419615  | -0.803838 | 0.000000     | 1.436425  | -0.819180 |
| Ru | 0.000000     | 0.000000  | 1.535627  | 0.000000         | 0.000000  | 1.552301  | 0.000000  | 0.000000  | 1.547826  | 0.000000     | 0.000000  | 1.565228  |
| Ru | 0.000000     | -1.402670 | -0.804171 | 0.000000         | -1.417604 | -0.820689 | 0.000000  | -1.419615 | -0.803838 | 0.000000     | -1.436425 | -0.819180 |
| C  | 0.000000     | 0.000000  | -2.398502 | 0.000000         | 0.000000  | -2.420179 | 0.000000  | 0.000000  | -2.393608 | 0.000000     | 0.000000  | -2.412246 |
| C  | -0.082816    | -2.101735 | 1.174970  | -0.071854        | -2.112705 | 1.184229  | -0.133833 | -2.118041 | 1.175609  | -0.129718    | -2.129998 | 1.185673  |
| C  | 0.082816     | 2.101735  | 1.174970  | 0.071854         | 2.112705  | 1.184229  | 0.133833  | 2.118041  | 1.175609  | 0.129718     | 2.129998  | 1.185673  |
| C  | 0.762295     | 2.822261  | -1.756663 | 0.628383         | 2.912249  | -1.794910 | 0.872719  | 2.768366  | -1.761196 | 0.727611     | 2.870975  | -1.807979 |
| C  | -1.593152    | 2.183079  | -1.236763 | -1.670799        | 2.077264  | -1.182262 | -1.531551 | 2.314143  | -1.278773 | -1.623966    | 2.208014  | -1.215352 |
| C  | -1.941406    | 0.107356  | 1.511558  | -1.950726        | 0.098326  | 1.506416  | -1.949626 | 0.147752  | 1.525846  | -1.957420    | 0.146659  | 1.516319  |
| C  | 1.941406     | -0.107356 | 1.511558  | 1.950726         | -0.098326 | 1.506416  | 1.949626  | -0.147752 | 1.525846  | 1.957420     | -0.146659 | 1.516319  |
| C  | -0.762295    | -2.822261 | -1.756663 | -0.628383        | -2.912249 | -1.794910 | -0.872719 | -2.768366 | -1.761196 | -0.727611    | -2.870975 | -1.807979 |
| C  | 1.593152     | -2.183079 | -1.236763 | 1.670799         | -2.077264 | -1.182262 | 1.531551  | -2.314143 | -1.278773 | 1.623966     | -2.208014 | -1.215352 |
| C  | 0.000000     | 0.000000  | 3.463029  | 0.000000         | 0.000000  | 3.488770  | 0.000000  | 0.000000  | 3.485633  | 0.000000     | 0.000000  | 3.510303  |
| O  | 0.000000     | 0.000000  | -3.567357 | 0.000000         | 0.000000  | -3.587572 | 0.000000  | 0.000000  | -3.581571 | 0.000000     | 0.000000  | -3.598593 |
| O  | -0.120157    | -3.099554 | 1.783820  | -0.086236        | -3.112613 | 1.787019  | -0.213897 | -3.123980 | 1.801485  | -0.186019    | -3.137769 | 1.807470  |
| O  | 0.120157     | 3.099554  | 1.783820  | 0.086236         | 3.112613  | 1.787019  | 0.213897  | 3.123980  | 1.801485  | 0.186019     | 3.137769  | 1.807470  |
| O  | 1.296588     | 3.671565  | -2.323399 | 1.074742         | 3.802829  | -2.372709 | 1.498289  | 3.579263  | -2.331900 | 1.260391     | 3.731949  | -2.397777 |
| O  | -2.623900    | 2.641049  | -1.484471 | -2.740376        | 2.460174  | -1.387295 | -2.541834 | 2.844938  | -1.556075 | -2.680251    | 2.664891  | -1.447485 |
| O  | -3.086693    | 0.171640  | 1.532953  | -3.096473        | 0.156896  | 1.507238  | -3.111824 | 0.233016  | 1.559879  | -3.119912    | 0.233913  | 1.528638  |
| O  | 3.086693     | -0.171640 | 1.532953  | 3.096473         | -0.156896 | 1.507238  | 3.111824  | -0.233016 | 1.559879  | 3.119912     | -0.233913 | 1.528638  |
| O  | -1.296588    | -3.671565 | -2.323399 | -1.074742        | -3.802829 | -2.372709 | -1.498289 | -3.579263 | -2.331900 | -1.260391    | -3.731949 | -2.397777 |
| O  | 2.623900     | -2.641049 | -1.484471 | 2.740376         | -2.460174 | -1.387295 | 2.541834  | -2.844938 | -1.556075 | 2.680251     | -2.664891 | -1.447485 |
| O  | 0.000000     | 0.000000  | 4.611433  | 0.000000         | 0.000000  | 4.637332  | 0.000000  | 0.000000  | 4.652727  | 0.000000     | 0.000000  | 4.677598  |

**Table S13** Coordinates of Ru<sub>3</sub>(CO)<sub>10</sub> (10-5)

|    | MPW1PW91/SDD |           |           | MPW1PW91/LANL2DZ |           |           | BP86/SDD  |           |           | BP86/LANL2DZ |           |           |
|----|--------------|-----------|-----------|------------------|-----------|-----------|-----------|-----------|-----------|--------------|-----------|-----------|
| Ru | 0.000000     | 1.550540  | -0.012871 | 0.000000         | 1.553067  | -0.011643 | 0.000000  | 1.575235  | -0.006286 | 0.000000     | 1.580794  | -0.004888 |
| Ru | 1.342807     | -0.775270 | -0.012871 | 1.344995         | -0.776533 | -0.011643 | 1.364193  | -0.787617 | -0.006286 | 1.369008     | -0.790397 | -0.004888 |
| Ru | -1.342807    | -0.775270 | -0.012871 | -1.344995        | -0.776533 | -0.011643 | -1.364193 | -0.787617 | -0.006286 | -1.369008    | -0.790397 | -0.004888 |
| C  | 0.000000     | 0.000000  | 1.476651  | 0.000000         | 0.000000  | 1.502011  | 0.000000  | 0.000000  | 1.469201  | 0.000000     | 0.000000  | 1.489861  |
| C  | 0.000000     | 2.878568  | 1.325981  | 0.000000         | 2.904022  | 1.323097  | 0.000000  | 2.919759  | 1.322667  | 0.000000     | 2.947274  | 1.318121  |
| C  | -1.427201    | 2.434067  | -0.916426 | -1.444617        | 2.433673  | -0.918627 | -1.436205 | 2.450508  | -0.918692 | -1.454318    | 2.449986  | -0.919741 |
| C  | 1.427201     | 2.434067  | -0.916426 | 1.444617         | 2.433673  | -0.918627 | 1.436205  | 2.450508  | -0.918692 | 1.454318     | 2.449986  | -0.919741 |
| C  | 2.492913     | -1.439284 | 1.325981  | 2.514957         | -1.452011 | 1.323097  | 2.528586  | -1.459880 | 1.322667  | 2.552414     | -1.473637 | 1.318121  |
| C  | 2.821564     | 0.018959  | -0.916426 | 2.829931         | 0.034239  | -0.918627 | 2.840305  | 0.018536  | -0.918692 | 2.848909     | 0.034483  | -0.919741 |
| C  | 1.394363     | -2.453025 | -0.916426 | 1.385314         | -2.467911 | -0.918627 | 1.404100  | -2.469044 | -0.918692 | 1.394591     | -2.484469 | -0.919741 |
| C  | -2.492913    | -1.439284 | 1.325981  | -2.514957        | -1.452011 | 1.323097  | -2.528586 | -1.459880 | 1.322667  | -2.552414    | -1.473637 | 1.318121  |
| C  | -1.394363    | -2.453025 | -0.916426 | -1.385314        | -2.467911 | -0.918627 | -1.404100 | -2.469044 | -0.918692 | -1.394591    | -2.484469 | -0.919741 |
| C  | -2.821564    | 0.018959  | -0.916426 | -2.829931        | 0.034239  | -0.918627 | -2.840305 | 0.018536  | -0.918692 | -2.848909    | 0.034483  | -0.919741 |
| O  | 0.000000     | 0.000000  | 2.659867  | 0.000000         | 0.000000  | 2.680771  | 0.000000  | 0.000000  | 2.673793  | 0.000000     | 0.000000  | 2.689926  |
| O  | 0.000000     | 3.648139  | 2.179549  | 0.000000         | 3.675871  | 2.173865  | 0.000000  | 3.710673  | 2.183292  | 0.000000     | 3.740369  | 2.176102  |
| O  | -2.209819    | 3.051268  | -1.492195 | -2.221373        | 3.055503  | -1.496654 | -2.226403 | 3.078639  | -1.510623 | -2.238820    | 3.082830  | -1.513652 |
| O  | 2.209819     | 3.051268  | -1.492195 | 2.221373         | 3.055503  | -1.496654 | 2.226403  | 3.078639  | -1.510623 | 2.238820     | 3.082830  | -1.513652 |
| O  | 3.159381     | -1.824069 | 2.179549  | 3.183398         | -1.837935 | 2.173865  | 3.213537  | -1.855336 | 2.183292  | 3.239254     | -1.870184 | 2.176102  |
| O  | 3.747386     | 0.388125  | -1.492195 | 3.756830         | 0.396014  | -1.496654 | 3.779381  | 0.388801  | -1.510623 | 3.789219     | 0.397460  | -1.513652 |
| O  | 1.537566     | -3.439394 | -1.492195 | 1.535457         | -3.451517 | -1.496654 | 1.552979  | -3.467441 | -1.510623 | 1.550399     | -3.480290 | -1.513652 |
| O  | -3.159381    | -1.824069 | 2.179549  | -3.183398        | -1.837935 | 2.173865  | -3.213537 | -1.855336 | 2.183292  | -3.239254    | -1.870184 | 2.176102  |
| O  | -1.537566    | -3.439394 | -1.492195 | -1.535457        | -3.451517 | -1.496654 | -1.552979 | -3.467441 | -1.510623 | -1.550399    | -3.480290 | -1.513652 |
| O  | -3.747386    | 0.388125  | -1.492195 | -3.756830        | 0.396014  | -1.496654 | -3.779381 | 0.388801  | -1.510623 | -3.789219    | 0.397460  | -1.513652 |

Table S14 Coordinates of Ru<sub>3</sub>(CO)<sub>9</sub> (9-1)

|    | MPW1PW91/SDD |           |           | MPW1PW91/LANL2DZ |           |           | BP86/SDD  |           |           | BP86/LANL2DZ |           |           |
|----|--------------|-----------|-----------|------------------|-----------|-----------|-----------|-----------|-----------|--------------|-----------|-----------|
| Ru | 1.208351     | -0.786204 | -0.158835 | 1.217173         | -0.800780 | -0.163871 | 1.193432  | -0.854085 | -0.152059 | 1.204528     | -0.863803 | -0.156689 |
| Ru | -0.056853    | 1.546965  | -0.192098 | -0.050747        | 1.551979  | -0.220445 | -0.021684 | 1.565743  | -0.177138 | -0.020169    | 1.574408  | -0.197826 |
| Ru | -1.519896    | -0.786613 | 0.261846  | -1.533281        | -0.784790 | 0.283452  | -1.510266 | -0.773559 | 0.231366  | -1.526390    | -0.774656 | 0.248501  |
| C  | 0.310683     | -1.407481 | 1.402301  | 0.295428         | -1.324703 | 1.446664  | 0.265559  | -1.343242 | 1.472222  | 0.256481     | -1.278429 | 1.500681  |
| C  | -2.055170    | 0.048990  | 1.922680  | -2.089227        | 0.111488  | 1.917750  | -2.232289 | 0.002472  | 1.849267  | -2.253310    | 0.051806  | 1.850188  |
| C  | 2.936850     | -0.194717 | 0.266842  | 2.954013         | -0.187956 | 0.239477  | 2.929086  | -0.206004 | 0.242145  | 2.948971     | -0.204286 | 0.218048  |
| C  | 1.924103     | -2.488828 | -0.503167 | 1.926228         | -2.537621 | -0.405725 | 1.925083  | -2.578554 | -0.397834 | 1.924680     | -2.613782 | -0.322056 |
| C  | -0.412042    | 1.355365  | -2.088930 | -0.418855        | 1.298447  | -2.117325 | -0.376683 | 1.433918  | -2.084114 | -0.375841    | 1.383579  | -2.108275 |
| C  | 1.276382     | 2.772873  | -0.578983 | 1.298939         | 2.762686  | -0.646236 | 1.333191  | 2.799170  | -0.515762 | 1.347875     | 2.798835  | -0.566655 |
| C  | 0.441485     | 1.677210  | 1.676178  | 0.442863         | 1.732408  | 1.658913  | 0.341082  | 1.743710  | 1.726745  | 0.349583     | 1.776685  | 1.714555  |
| C  | -0.922997    | -1.480384 | -1.449935 | -0.914560        | -1.545141 | -1.408140 | -0.726102 | -1.439299 | -1.452133 | -0.732190    | -1.485908 | -1.426805 |
| C  | -3.151778    | -0.228067 | -0.530820 | -3.164922        | -0.244503 | -0.554129 | -3.111898 | -0.320081 | -0.699135 | -3.130153    | -0.330185 | -0.706612 |
| O  | 0.368381     | -1.909418 | 2.464678  | 0.397854         | -1.754141 | 2.535681  | 0.347421  | -1.771547 | 2.582961  | 0.371583     | -1.653182 | 2.626235  |
| O  | -2.426055    | 0.541835  | 2.890843  | -2.465209        | 0.635904  | 2.866542  | -2.718589 | 0.468565  | 2.802930  | -2.736589    | 0.546991  | 2.789948  |
| O  | 3.976284     | 0.145078  | 0.634786  | 3.990608         | 0.173840  | 0.592501  | 3.984202  | 0.174876  | 0.580640  | 4.003689     | 0.188029  | 0.542853  |
| O  | 2.369924     | -3.523690 | -0.749570 | 2.364538         | -3.589290 | -0.581463 | 2.391317  | -3.640125 | -0.572739 | 2.381376     | -3.686736 | -0.439694 |
| O  | -0.596563    | 1.308821  | -3.221471 | -0.615526        | 1.206240  | -3.244623 | -0.582481 | 1.453546  | -3.232671 | -0.580282    | 1.356565  | -3.256541 |
| O  | 2.142570     | 3.494551  | -0.835565 | 2.170723         | 3.468073  | -0.925272 | 2.219857  | 3.536678  | -0.742002 | 2.240014     | 3.522743  | -0.811224 |
| O  | 0.788318     | 1.815578  | 2.761401  | 0.780825         | 1.894100  | 2.743015  | 0.590316  | 1.938518  | 2.849034  | 0.601347     | 1.977857  | 2.834567  |
| O  | -0.733603    | -1.902584 | -2.507779 | -0.725885        | -2.003727 | -2.450204 | -0.547375 | -1.844325 | -2.544123 | -0.557232    | -1.916965 | -2.508203 |
| O  | -4.123705    | 0.130794  | -1.034472 | -4.127659        | 0.104926  | -1.079863 | -4.083093 | -0.044797 | -1.292004 | -4.094813    | -0.056763 | -1.309667 |



Table S15 Coordinates of Ru<sub>3</sub>(CO)<sub>9</sub> (9-2)

|    | MPW1PW91/SDD |           |           | MPW1PW91/LANL2DZ |           |           | BP86/SDD  |           |           | BP86/LANL2DZ |           |           |
|----|--------------|-----------|-----------|------------------|-----------|-----------|-----------|-----------|-----------|--------------|-----------|-----------|
| Ru | 1.066113     | -0.900443 | 0.000000  | -1.034092        | -0.963397 | 0.000000  | 1.117482  | -0.901616 | 0.000000  | 1.087566     | -0.969406 | 0.000000  |
| Ru | -1.713341    | -0.725239 | 0.000000  | 1.774899         | -0.652479 | 0.000000  | -1.706250 | -0.748479 | 0.000000  | -1.771266    | -0.674087 | 0.000000  |
| Ru | -0.047901    | 1.527079  | 0.000000  | -0.020067        | 1.528722  | 0.000000  | -0.065969 | 1.537972  | 0.000000  | 0.003054     | 1.540187  | 0.000000  |
| C  | -0.473632    | -0.721569 | 1.492822  | 0.511595         | -0.669462 | -1.492606 | -0.460909 | -0.771298 | 1.504075  | -0.504461    | -0.718452 | 1.502777  |
| C  | -0.473632    | -0.721569 | -1.492822 | 0.511595         | -0.669462 | 1.492606  | -0.460909 | -0.771298 | -1.504075 | -0.504461    | -0.718452 | -1.502777 |
| C  | -2.299212    | -2.548764 | 0.000000  | 2.368919         | -2.488383 | 0.000000  | -2.432894 | -2.528815 | 0.000000  | -2.519922    | -2.459813 | 0.000000  |
| C  | 2.110034     | -1.819753 | -1.303378 | -2.047766        | -1.923484 | 1.314669  | 2.205976  | -1.781410 | -1.301053 | 2.144638     | -1.890467 | -1.312212 |
| C  | 2.110034     | -1.819753 | 1.303378  | -2.047766        | -1.923484 | -1.314669 | 2.205976  | -1.781410 | 1.301053  | 2.144638     | -1.890467 | 1.312212  |
| C  | -2.001838    | 1.489152  | 0.000000  | 1.959098         | 1.569747  | 0.000000  | -2.037894 | 1.426981  | 0.000000  | -1.995001    | 1.521531  | 0.000000  |
| C  | 0.288237     | 2.830063  | 1.288277  | -0.398778        | 2.830767  | -1.291420 | 0.222845  | 2.851548  | 1.297091  | 0.344366     | 2.851854  | 1.298777  |
| C  | 2.028441     | 0.826473  | 0.000000  | -2.071901        | 0.738594  | 0.000000  | 2.015805  | 0.888937  | 0.000000  | 2.061794     | 0.795375  | 0.000000  |
| C  | 0.288237     | 2.830063  | -1.288277 | -0.398778        | 2.830767  | 1.291420  | 0.222845  | 2.851548  | -1.297091 | 0.344366     | 2.851854  | -1.298777 |
| O  | -0.603834    | -0.789420 | 2.663682  | 0.642004         | -0.729494 | -2.662637 | -0.557279 | -0.869666 | 2.693697  | -0.600042    | -0.812784 | 2.691639  |
| O  | -0.603834    | -0.789420 | -2.663682 | 0.642004         | -0.729494 | 2.662637  | -0.557279 | -0.869666 | -2.693697 | -0.600042    | -0.812784 | -2.691639 |
| O  | -2.606180    | -3.656391 | 0.000000  | 2.672896         | -3.596291 | 0.000000  | -2.854671 | -3.619833 | 0.000000  | -2.944514    | -3.549031 | 0.000000  |
| O  | 2.758554     | -2.375265 | -2.073316 | -2.677759        | -2.498847 | 2.084679  | 2.890186  | -2.323905 | -2.078110 | 2.808817     | -2.453646 | -2.091333 |
| O  | 2.758554     | -2.375265 | 2.073316  | -2.677759        | -2.498847 | -2.084679 | 2.890186  | -2.323905 | 2.078110  | 2.808817     | -2.453646 | 2.091333  |
| O  | -3.140733    | 1.753750  | 0.000000  | 3.062484         | 1.950810  | 0.000000  | -3.205500 | 1.660910  | 0.000000  | -3.128286    | 1.878025  | 0.000000  |
| O  | 0.490105     | 3.604054  | 2.114160  | -0.627001        | 3.599164  | -2.114874 | 0.393364  | 3.644066  | 2.140423  | 0.547893     | 3.639373  | 2.138717  |
| O  | 3.097967     | 1.307964  | 0.000000  | -3.163604        | 1.161480  | 0.000000  | 3.098052  | 1.386026  | 0.000000  | 3.166047     | 1.236082  | 0.000000  |
| O  | 0.490105     | 3.604054  | -2.114160 | -0.627001        | 3.599164  | 2.114874  | 0.393364  | 3.644066  | -2.140423 | 0.547893     | 3.639373  | -2.138717 |

**Table S16** Coordinates of Ru<sub>3</sub>(CO)<sub>9</sub> (9-3)

|    | MPW1PW91/SDD |           |           | MPW1PW91/LANL2DZ |           |           | BP86/SDD  |           |           | BP86/LANL2DZ |           |           |
|----|--------------|-----------|-----------|------------------|-----------|-----------|-----------|-----------|-----------|--------------|-----------|-----------|
| Ru | 0.616055     | 1.453298  | -0.159400 | 0.607634         | 1.471924  | -0.154240 | 0.604095  | 1.462604  | -0.119504 | 0.591439     | 1.487341  | -0.125036 |
| Ru | 0.950566     | -1.260168 | -0.159400 | 0.970907         | -1.262188 | -0.154240 | 0.964605  | -1.254464 | -0.119504 | 0.992356     | -1.255871 | -0.125036 |
| Ru | -1.566621    | -0.193130 | -0.159400 | -1.578541        | -0.209736 | -0.154240 | -1.568700 | -0.208141 | -0.119504 | -1.583795    | -0.231470 | -0.125036 |
| C  | 1.625192     | 0.698102  | 1.224524  | 1.631984         | 0.655570  | 1.218189  | 1.669267  | 0.679642  | 1.244127  | 1.665743     | 0.644550  | 1.229687  |
| C  | 0.000000     | 3.265239  | -0.043477 | 0.000000         | 3.293009  | -0.048348 | 0.000000  | 3.277618  | -0.033956 | 0.000000     | 3.308932  | -0.017091 |
| C  | 2.200719     | 1.977977  | -1.028513 | 2.202313         | 1.996590  | -1.032142 | 2.139465  | 1.947674  | -1.107803 | 2.141448     | 1.981730  | -1.109730 |
| C  | -0.208022    | -1.756508 | 1.224524  | -0.248252        | -1.741125 | 1.218189  | -0.246046 | -1.785449 | 1.244127  | -0.274675    | -1.764851 | 1.229687  |
| C  | 2.827780     | -1.632620 | -0.043477 | 2.851830         | -1.646505 | -0.048348 | 2.838500  | -1.638809 | -0.033956 | 2.865619     | -1.654466 | -0.017091 |
| C  | 0.612619     | -2.894867 | -1.028513 | 0.627941         | -2.905554 | -1.032142 | 0.617003  | -2.826668 | -1.107803 | 0.645505     | -2.845413 | -1.109730 |
| C  | -1.417169    | 1.058406  | 1.224524  | -1.383733        | 1.085555  | 1.218189  | -1.423221 | 1.105806  | 1.244127  | -1.391068    | 1.120301  | 1.229687  |
| C  | -2.827780    | -1.632620 | -0.043477 | -2.851830        | -1.646505 | -0.048348 | -2.838500 | -1.638809 | -0.033956 | -2.865619    | -1.654466 | -0.017091 |
| C  | -2.813338    | 0.916890  | -1.028513 | -2.830254        | 0.908964  | -1.032142 | -2.756467 | 0.878994  | -1.107803 | -2.786953    | 0.863683  | -1.109730 |
| O  | 2.237776     | 0.625694  | 2.212362  | 2.247632         | 0.608984  | 2.205350  | 2.320178  | 0.645322  | 2.231685  | 2.313612     | 0.639731  | 2.219655  |
| O  | -0.275299    | 4.364034  | 0.162005  | -0.273157        | 4.392660  | 0.153537  | -0.270938 | 4.404513  | 0.136355  | -0.264618    | 4.434430  | 0.169167  |
| O  | 3.147903     | 2.273316  | -1.612070 | 3.149893         | 2.290836  | -1.613839 | 3.051920  | 2.220709  | -1.787541 | 3.059033     | 2.261199  | -1.778272 |
| O  | -0.577021    | -2.250818 | 2.212362  | -0.596421        | -2.250998 | 2.205350  | -0.601223 | -2.331994 | 2.231685  | -0.602783    | -2.323512 | 2.219655  |
| O  | 3.917014     | -1.943601 | 0.162005  | 3.940734         | -1.959769 | 0.153537  | 3.949889  | -1.967618 | 0.136355  | 3.972638     | -1.988049 | 0.169167  |
| O  | 0.394798     | -3.862821 | -1.612070 | 0.408976         | -3.873306 | -1.613839 | 0.397230  | -3.753395 | -1.787541 | 0.428739     | -3.779800 | -1.778272 |
| O  | -1.660755    | 1.625124  | 2.212362  | -1.651211        | 1.642015  | 2.205350  | -1.718954 | 1.686672  | 2.231685  | -1.710829    | 1.683782  | 2.219655  |
| O  | -3.641715    | -2.420433 | 0.162005  | -3.667577        | -2.432891 | 0.153537  | -3.678952 | -2.436896 | 0.136355  | -3.708020    | -2.446380 | 0.169167  |
| O  | -3.542700    | 1.589506  | -1.612070 | -3.558869        | 1.582470  | -1.613839 | -3.449150 | 1.532686  | -1.787541 | -3.487772    | 1.518601  | -1.778272 |

Table S17 Coordinates of Ru<sub>3</sub>(CO)<sub>9</sub> (9-4)

|    | MPW1PW91/SDD |           |           | MPW1PW91/LANL2DZ |           |           | BP86/SDD  |           |           | BP86/LANL2DZ |           |           |
|----|--------------|-----------|-----------|------------------|-----------|-----------|-----------|-----------|-----------|--------------|-----------|-----------|
| Ru | 0.000000     | 1.592245  | 0.102868  | 0.000000         | 1.607226  | 0.103267  | 0.000000  | 1.601515  | 0.101536  | 0.000000     | 1.617996  | 0.104119  |
| Ru | 1.378925     | -0.796123 | 0.102868  | 1.391899         | -0.803613 | 0.103267  | 1.386953  | -0.800758 | 0.101536  | 1.401226     | -0.808998 | 0.104119  |
| Ru | -1.378925    | -0.796123 | 0.102868  | -1.391899        | -0.803613 | 0.103267  | -1.386953 | -0.800758 | 0.101536  | -1.401226    | -0.808998 | 0.104119  |
| C  | -0.685928    | 1.599218  | -1.730399 | -0.688189        | 1.610695  | -1.740493 | -0.771068 | 1.591510  | -1.702144 | -0.767866    | 1.599721  | -1.711068 |
| C  | 0.692637     | 1.565568  | 1.887326  | 0.695177         | 1.574974  | 1.900459  | 0.691617  | 1.611675  | 1.897581  | 0.704570     | 1.613996  | 1.907898  |
| C  | 1.262960     | 2.892545  | -0.301032 | 1.281505         | 2.902264  | -0.303743 | 1.214952  | 2.953981  | -0.332998 | 1.233200     | 2.964263  | -0.335159 |
| C  | 1.009503     | -1.382625 | 1.887326  | 1.016379         | -1.389528 | 1.900459  | 1.049943  | -1.404795 | 1.897581  | 1.045477     | -1.417174 | 1.907898  |
| C  | 1.727928     | -0.205578 | -1.730399 | 1.738997         | -0.209358 | -1.740493 | 1.763822  | -0.127990 | -1.702144 | 1.769332     | -0.134869 | -1.711068 |
| C  | 1.873538     | -2.540028 | -0.301032 | 1.872682         | -2.560947 | -0.303743 | 1.950747  | -2.529170 | -0.332998 | 1.950527     | -2.550114 | -0.335159 |
| C  | -1.702140    | -0.182943 | 1.887326  | -1.711556        | -0.185446 | 1.900459  | -1.741560 | -0.206880 | 1.897581  | -1.750047    | -0.196823 | 1.907898  |
| C  | -1.042000    | -1.393640 | -1.730399 | -1.050808        | -1.401337 | -1.740493 | -0.992754 | -1.463520 | -1.702144 | -1.001466    | -1.464852 | -1.711068 |
| C  | -3.136498    | -0.352517 | -0.301032 | -3.154186        | -0.341316 | -0.303743 | -3.165699 | -0.424811 | -0.332998 | -3.183727    | -0.414149 | -0.335159 |
| O  | -1.096906    | 1.681621  | -2.798991 | -1.097845        | 1.683846  | -2.809831 | -1.245169 | 1.690050  | -2.764157 | -1.233434    | 1.685840  | -2.777451 |
| O  | 1.134055     | 1.666146  | 2.946449  | 1.133860         | 1.669607  | 2.960477  | 1.124814  | 1.744874  | 2.976827  | 1.144874     | 1.735887  | 2.984862  |
| O  | 2.068683     | 3.664773  | -0.605155 | 2.096215         | 3.662937  | -0.610781 | 1.990943  | 3.770783  | -0.667949 | 2.019196     | 3.768067  | -0.676320 |
| O  | 0.875898     | -1.815193 | 2.946449  | 0.878992         | -1.816755 | 2.960477  | 0.948699  | -1.846554 | 2.976827  | 0.930885     | -1.859434 | 2.984862  |
| O  | 2.004779     | 0.109138  | -2.798991 | 2.007176         | 0.108839  | -2.809831 | 2.086210  | 0.233323  | -2.764157 | 2.076698     | 0.225265  | -2.777451 |
| O  | 2.139445     | -3.623919 | -0.605155 | 2.124089         | -3.646844 | -0.610781 | 2.270122  | -3.609598 | -0.667949 | 2.253644     | -3.632708 | -0.676320 |
| O  | -2.009952    | 0.149047  | 2.946449  | -2.012852        | 0.147148  | 2.960477  | -2.073512 | 0.101680  | 2.976827  | -2.075760    | 0.123547  | 2.984862  |
| O  | -0.907874    | -1.790759 | -2.798991 | -0.909331        | -1.792685 | -2.809831 | -0.841042 | -1.923372 | -2.764157 | -0.843263    | -1.911106 | -2.777451 |
| O  | -4.208128    | -0.040855 | -0.605155 | -4.220304        | -0.016093 | -0.610781 | -4.261065 | -0.161184 | -0.667949 | -4.272839    | -0.135359 | -0.676320 |

**Table S18** Harmonic frequencies (cm<sup>-1</sup>) and IR intensities (KM/Mole) of Ru<sub>3</sub>(CO)<sub>12</sub> (12-1)

| MPW1PW91/SDD                                                                                                                                                                                                                                                                                                                                                                                                                                                                                                                                                                                                                                                                                         | MPW1PW91/LANL2DZ                                                                                                                                                                                                                                                                                                                                                                                                                                                                                                                                                                                                                                                                                 | BP86/SDD                                                                                                                                                                                                                                                                                                                                                                                                                                                                                                                                                                                                                                                                                       | BP86/LANL2DZ                                                                                                                                                                                                                                                                                                                                                                                                                                                                                                                                                                                                                                                                                  |
|------------------------------------------------------------------------------------------------------------------------------------------------------------------------------------------------------------------------------------------------------------------------------------------------------------------------------------------------------------------------------------------------------------------------------------------------------------------------------------------------------------------------------------------------------------------------------------------------------------------------------------------------------------------------------------------------------|--------------------------------------------------------------------------------------------------------------------------------------------------------------------------------------------------------------------------------------------------------------------------------------------------------------------------------------------------------------------------------------------------------------------------------------------------------------------------------------------------------------------------------------------------------------------------------------------------------------------------------------------------------------------------------------------------|------------------------------------------------------------------------------------------------------------------------------------------------------------------------------------------------------------------------------------------------------------------------------------------------------------------------------------------------------------------------------------------------------------------------------------------------------------------------------------------------------------------------------------------------------------------------------------------------------------------------------------------------------------------------------------------------|-----------------------------------------------------------------------------------------------------------------------------------------------------------------------------------------------------------------------------------------------------------------------------------------------------------------------------------------------------------------------------------------------------------------------------------------------------------------------------------------------------------------------------------------------------------------------------------------------------------------------------------------------------------------------------------------------|
| 36(0), 37(0), 37(0), 49(0), 49(0), 52(0),<br>71(0), 71(0), 78(0), 78(0), 80(0), 87(1),<br>90(0), 92(0), 92(0), 100(0), 101(0),<br>101(0), 113(0), 113(0), 118(2), 118(2),<br>132(0), 135(0), 153(1), 153(1), 191(0),<br>381(1), 381(1), 394(0), 400(1), 400(1),<br>408(6), 413(2), 413(2), 417(0), 447(1),<br>447(1), 455(5), 457(4), 457(4), 460(0),<br>465(3), 465(3), 478(78), 482(0), 482(0),<br>486(0), 496(27), 496(27), 508(0),<br>536(18), 536(18), 539(0), 547(129),<br>568(2), 568(2), 578(12), 602(284),<br>602(284), 615(194), 615(194), 622(0),<br>2089(10), 2089(10), 2104(4),<br>2110(262), 2110(262), 2120(81),<br>2120(81), 2129(3115), 2132(0),<br>2158(2554), 2158(2554), 2218(0) | 34(0), 34(0), 35(0), 48(0), 48(0), 53(0),<br>69(0), 69(0), 76(0), 76(0), 77(0), 84(0),<br>87(0), 89(0), 89(0), 97(0), 99(0), 99(0),<br>111(0), 111(0), 117(2), 117(2), 130(0),<br>133(0), 150(1), 150(1), 187(0), 367(1),<br>367(1), 381(0), 386(1), 386(1), 393(7),<br>398(3), 398(3), 404(0), 435(0), 435(0),<br>438(5), 443(1), 443(1), 450(6), 450(6),<br>451(0), 462(85), 466(0), 466(0), 470(0),<br>479(30), 479(30), 495(0), 522(15),<br>522(15), 524(0), 533(107), 551(1),<br>551(1), 562(5), 589(330), 589(330),<br>599(114), 599(114), 603(0), 2092(15),<br>2092(15), 2108(0), 2113(190),<br>2113(190), 2124(81), 2124(81),<br>2130(3069), 2135(0), 2160(2526),<br>2160(2526), 2217(0) | 34(0), 34(0), 37(0), 47(0), 47(0), 52(0),<br>67(0), 67(0), 75(0), 75(0), 76(0), 82(0),<br>86(0), 86(0), 86(0), 94(0), 94(0), 95(0),<br>105(0), 105(0), 112(2), 112(2), 120(0),<br>123(0), 141(0), 141(0), 175(0), 357(1),<br>357(1), 369(0), 375(1), 375(1), 387(1),<br>389(3), 389(3), 394(1), 432(1), 432(1),<br>443(3), 443(3), 444(0), 446(0), 452(5),<br>452(5), 457(62), 467(1), 467(1), 475(0),<br>479(0), 480(10), 480(10), 505(15),<br>505(15), 507(0), 519(117), 536(1),<br>536(1), 547(2), 572(247), 572(247),<br>584(159), 584(159), 587(0), 1968(7),<br>1968(7), 1981(9), 1989(396),<br>1989(396), 1997(34), 1997(34),<br>2005(2594), 2008(0), 2036(1950),<br>2036(1950), 2088(0) | 31(0), 31(0), 36(0), 46(0), 46(0), 52(0),<br>65(0), 65(0), 73(0), 73(0), 74(0), 79(0),<br>82(0), 83(0), 83(0), 92(0), 92(0), 93(0),<br>103(0), 103(0), 111(2), 111(2), 118(0),<br>121(0), 138(1), 138(1), 172(0), 344(1),<br>344(1), 356(0), 363(0), 363(0), 375(2),<br>375(2), 376(1), 380(0), 420(0), 420(0),<br>429(0), 430(1), 430(1), 438(0), 438(7),<br>438(7), 440(68), 453(1), 453(1), 462(0),<br>466(10), 466(10), 466(0), 491(13),<br>491(13), 494(0), 505(95), 520(1),<br>520(1), 533(0), 559(280), 559(280),<br>570(99), 570(99), 570(0), 1970(10),<br>1970(10), 1983(5), 1991(336),<br>1991(336), 1999(34), 1999(34),<br>2005(2550), 2009(0), 2036(1930),<br>2036(1930), 2086(0) |

**Table S19** Harmonic frequencies ( $\text{cm}^{-1}$ ) and IR intensities (KM/Mole) of  $\text{Ru}_3(\text{CO})_{12}$  (12-2)

| MPW1PW91/SDD                                                                                                                                                                                                                                                                                                                                                                                                                                                                                                                                                                                                                                           | MPW1PW91/LANL2DZ                                                                                                                                                                                                                                                                                                                                                                                                                                                                                                                                                                                                                                          | BP86/SDD                                                                                                                                                                                                                                                                                                                                                                                                                                                                                                                                                                                                                                             | BP86/LANL2DZ                                                                                                                                                                                                                                                                                                                                                                                                                                                                                                                                                                                                                                       |
|--------------------------------------------------------------------------------------------------------------------------------------------------------------------------------------------------------------------------------------------------------------------------------------------------------------------------------------------------------------------------------------------------------------------------------------------------------------------------------------------------------------------------------------------------------------------------------------------------------------------------------------------------------|-----------------------------------------------------------------------------------------------------------------------------------------------------------------------------------------------------------------------------------------------------------------------------------------------------------------------------------------------------------------------------------------------------------------------------------------------------------------------------------------------------------------------------------------------------------------------------------------------------------------------------------------------------------|------------------------------------------------------------------------------------------------------------------------------------------------------------------------------------------------------------------------------------------------------------------------------------------------------------------------------------------------------------------------------------------------------------------------------------------------------------------------------------------------------------------------------------------------------------------------------------------------------------------------------------------------------|----------------------------------------------------------------------------------------------------------------------------------------------------------------------------------------------------------------------------------------------------------------------------------------------------------------------------------------------------------------------------------------------------------------------------------------------------------------------------------------------------------------------------------------------------------------------------------------------------------------------------------------------------|
| -15(0), 41(0), 42(0), 42(0), 53(0), 54(0), 69(0), 70(0), 75(0), 79(0), 82(0), 83(0), 87(0), 89(0), 90(0), 92(0), 95(0), 98(0), 98(0), 99(0), 110(0), 113(1), 156(1), 164(0), 172(0), 212(0), 224(6), 309(0), 373(7), 376(0), 396(0), 398(0), 405(0), 409(5), 414(13), 417(0), 420(25), 444(2), 446(60), 449(1), 450(10), 455(0), 460(7), 461(67), 467(15), 472(8), 472(0), 478(3), 490(15), 504(0), 504(10), 528(5), 533(0), 537(2), 555(155), 565(87), 566(0), 578(28), 593(96), 602(305), 607(509), 607(0), 613(78), 1935(880), 1984(250), 2109(75), 2112(4), 2121(624), 2126(0), 2127(167), 2136(129), 2141(2452), 2163(1969), 2164(2481), 2217(58) | -33(0), 40(0), 41(0), 41(0), 53(0), 53(0), 68(0), 70(0), 73(0), 76(0), 79(0), 80(0), 83(0), 87(0), 88(0), 89(0), 93(0), 96(0), 97(0), 99(1), 109(0), 113(0), 152(1), 160(0), 161(0), 204(0), 217(7), 298(0), 352(10), 358(1), 383(0), 385(0), 391(0), 395(6), 399(14), 403(0), 407(24), 430(51), 433(1), 436(25), 436(2), 443(0), 446(55), 450(5), 452(11), 454(11), 456(0), 460(4), 476(14), 488(10), 489(0), 513(5), 517(0), 524(0), 537(130), 548(81), 548(0), 564(21), 578(128), 585(267), 586(0), 592(436), 596(87), 1948(884), 1994(256), 2113(54), 2115(6), 2125(547), 2129(0), 2131(156), 2139(109), 2143(2386), 2165(1959), 2166(2438), 2216(58) | 33(0), 39(0), 39(0), 40(0), 49(0), 50(0), 62(0), 65(0), 72(0), 75(0), 77(0), 79(0), 82(0), 85(0), 85(0), 86(0), 91(0), 92(0), 93(0), 94(0), 100(0), 102(0), 142(1), 150(0), 162(0), 194(0), 213(6), 291(0), 353(3), 357(0), 370(0), 374(0), 377(1), 388(1), 392(0), 392(17), 396(12), 419(1), 433(56), 437(4), 438(3), 441(0), 444(56), 449(6), 452(4), 455(2), 461(17), 468(1), 474(3), 475(0), 486(7), 500(0), 501(4), 505(0), 526(113), 536(14), 537(41), 547(36), 563(126), 574(417), 574(230), 576(0), 580(78), 1845(616), 1874(191), 1985(78), 1986(2), 1996(690), 2000(0), 2000(146), 2010(122), 2014(2068), 2038(2088), 2040(1399), 2084(69) | 26(0), 37(0), 37(0), 38(0), 49(0), 50(0), 62(0), 65(0), 70(0), 72(0), 75(0), 76(0), 79(0), 83(0), 83(0), 83(0), 89(0), 90(0), 91(0), 93(1), 99(0), 102(0), 140(1), 147(0), 151(0), 188(0), 205(7), 282(0), 334(5), 339(1), 357(0), 362(0), 365(2), 375(1), 379(0), 381(16), 383(13), 409(3), 418(51), 424(3), 425(5), 428(57), 430(0), 437(2), 438(6), 443(0), 448(18), 454(1), 461(2), 462(0), 472(6), 486(0), 488(4), 494(0), 509(93), 521(13), 522(32), 535(36), 549(174), 557(0), 558(189), 559(338), 565(91), 1856(612), 1883(192), 1987(65), 1988(4), 1998(636), 2002(0), 2002(134), 2012(106), 2015(2016), 2038(2040), 2040(1384), 2083(69) |

**Table S20** Harmonic frequencies (cm<sup>-1</sup>) and IR intensities (KM/Mole) of Ru<sub>3</sub>(CO)<sub>12</sub> (12-3)

| MPW1PW91/SDD                                                                                                                                                                                                                                                                                                                                                                                                                                                                                                                                                                                                                                     | MPW1PW91/LANL2DZ                                                                                                                                                                                                                                                                                                                                                                                                                                                                                                                                                                                                                             | BP86/SDD                                                                                                                                                                                                                                                                                                                                                                                                                                                                                                                                                                                                                                       | BP86/LANL2DZ                                                                                                                                                                                                                                                                                                                                                                                                                                                                                                                                                                                                                                 |
|--------------------------------------------------------------------------------------------------------------------------------------------------------------------------------------------------------------------------------------------------------------------------------------------------------------------------------------------------------------------------------------------------------------------------------------------------------------------------------------------------------------------------------------------------------------------------------------------------------------------------------------------------|----------------------------------------------------------------------------------------------------------------------------------------------------------------------------------------------------------------------------------------------------------------------------------------------------------------------------------------------------------------------------------------------------------------------------------------------------------------------------------------------------------------------------------------------------------------------------------------------------------------------------------------------|------------------------------------------------------------------------------------------------------------------------------------------------------------------------------------------------------------------------------------------------------------------------------------------------------------------------------------------------------------------------------------------------------------------------------------------------------------------------------------------------------------------------------------------------------------------------------------------------------------------------------------------------|----------------------------------------------------------------------------------------------------------------------------------------------------------------------------------------------------------------------------------------------------------------------------------------------------------------------------------------------------------------------------------------------------------------------------------------------------------------------------------------------------------------------------------------------------------------------------------------------------------------------------------------------|
| -14(0), 30(0), 40(0), 40(0), 41(0), 41(0), 72(0), 72(0), 73(0), 73(0), 80(0), 88(0), 89(0), 94(0), 97(0), 97(0), 103(1), 103(1), 118(0), 118(0), 123(0), 123(0), 150(1), 150(1), 156(0), 158(0), 186(0), 396(0), 396(0), 400(2), 400(2), 403(0), 409(0), 409(0), 411(0), 422(10), 445(0), 445(0), 451(0), 456(0), 458(4), 458(4), 471(0), 471(0), 473(107), 478(13), 478(13), 490(0), 497(45), 497(45), 521(0), 538(0), 540(0), 540(0), 575(0), 575(0), 577(88), 585(0), 605(89), 605(89), 630(362), 630(362), 631(0), 2097(0), 2097(0), 2099(0), 2114(20), 2114(20), 2117(485), 2117(485), 2140(3053), 2141(0), 2163(2377), 2163(2376), 2225(0) | -16(0), 30(0), 40(0), 40(0), 42(0), 42(0), 70(0), 70(0), 72(0), 72(0), 77(0), 85(0), 86(0), 92(0), 93(0), 93(0), 103(1), 103(1), 117(0), 117(0), 122(0), 122(0), 148(1), 148(1), 156(0), 158(0), 182(0), 382(0), 382(0), 387(2), 387(2), 392(0), 394(0), 394(0), 399(0), 407(8), 432(0), 433(1), 433(1), 442(4), 442(4), 447(0), 456(99), 460(0), 460(0), 462(12), 462(12), 474(0), 481(45), 481(45), 507(0), 523(0), 525(0), 525(0), 559(0), 559(0), 562(76), 575(0), 593(65), 593(65), 613(0), 614(350), 614(350), 2099(0), 2099(0), 2103(0), 2118(0), 2118(0), 2120(390), 2120(390), 2141(3002), 2144(0), 2164(2400), 2164(2400), 2224(0) | -14(0), 26(0), 34(0), 34(0), 36(0), 36(0), 67(0), 67(0), 69(0), 69(0), 73(0), 82(0), 84(0), 90(0), 90(0), 90(0), 97(1), 97(1), 108(0), 108(0), 114(0), 114(0), 137(1), 137(1), 143(0), 144(0), 170(0), 369(1), 369(1), 371(0), 371(0), 380(0), 383(0), 391(0), 391(0), 403(1), 429(1), 429(1), 442(0), 443(0), 447(10), 447(10), 451(87), 455(0), 455(0), 461(13), 461(13), 478(0), 484(18), 484(18), 493(0), 507(0), 507(0), 507(0), 541(72), 543(0), 543(0), 562(0), 573(56), 573(56), 594(0), 599(320), 599(320), 1975(0), 1975(0), 1978(0), 1991(30), 1991(30), 1995(558), 1995(558), 2014(2529), 2017(0), 2042(1779), 2042(1779), 2094(0) | -16(0), 30(0), 40(0), 40(0), 42(0), 42(0), 70(0), 70(0), 72(0), 72(0), 77(0), 85(0), 86(0), 92(0), 93(0), 93(0), 103(1), 103(1), 117(0), 117(0), 122(0), 122(0), 148(1), 148(1), 156(0), 158(0), 182(0), 382(0), 382(0), 387(2), 387(2), 392(0), 394(0), 394(0), 399(0), 407(8), 432(0), 433(1), 433(1), 442(4), 442(4), 447(0), 456(99), 460(0), 460(0), 462(12), 462(12), 474(0), 481(45), 481(45), 507(0), 523(0), 525(0), 525(0), 559(0), 559(0), 562(76), 575(0), 593(65), 593(65), 613(0), 614(350), 614(350), 2099(0), 2099(0), 2103(0), 2118(0), 2118(0), 2120(390), 2120(390), 2141(3002), 2144(0), 2164(2400), 2164(2400), 2224(0) |

**Table S21** Harmonic frequencies (cm<sup>-1</sup>) and IR intensities (KM/Mole) of Ru<sub>3</sub>(CO)<sub>12</sub> (12-4)

| MPW1PW91/SDD                                                                                                                                                                                                                                                                                                                                                                                                                                                                                                                                                                                                                                     | MPW1PW91/LANL2DZ                                                                                                                                                                                                                                                                                                                                                                                                                                                                                                                                                                                                                                 | BP86/SDD                                                                                                                                                                                                                                                                                                                                                                                                                                                                                                                                                                                                                                     | BP86/LANL2DZ                                                                                                                                                                                                                                                                                                                                                                                                                                                                                                                                                                                                                                |
|--------------------------------------------------------------------------------------------------------------------------------------------------------------------------------------------------------------------------------------------------------------------------------------------------------------------------------------------------------------------------------------------------------------------------------------------------------------------------------------------------------------------------------------------------------------------------------------------------------------------------------------------------|--------------------------------------------------------------------------------------------------------------------------------------------------------------------------------------------------------------------------------------------------------------------------------------------------------------------------------------------------------------------------------------------------------------------------------------------------------------------------------------------------------------------------------------------------------------------------------------------------------------------------------------------------|----------------------------------------------------------------------------------------------------------------------------------------------------------------------------------------------------------------------------------------------------------------------------------------------------------------------------------------------------------------------------------------------------------------------------------------------------------------------------------------------------------------------------------------------------------------------------------------------------------------------------------------------|---------------------------------------------------------------------------------------------------------------------------------------------------------------------------------------------------------------------------------------------------------------------------------------------------------------------------------------------------------------------------------------------------------------------------------------------------------------------------------------------------------------------------------------------------------------------------------------------------------------------------------------------|
| 34(0), 53(0), 54(0), 54(0), 56(0), 56(0), 59(0), 67(0), 76(0), 76(0), 84(0), 84(0), 89(0), 89(0), 89(1), 94(0), 94(0), 109(0), 109(0), 112(0), 117(0), 129(0), 144(0), 144(0), 184(0), 209(8), 209(8), 339(0), 343(63), 343(63), 362(0), 384(0), 384(0), 402(0), 402(0), 405(171), 405(171), 412(61), 422(28), 431(0), 431(0), 444(0), 445(0), 445(0), 454(0), 486(8), 486(8), 490(0), 501(0), 509(3), 509(3), 510(0), 510(0), 521(55), 580(0), 580(0), 587(88), 615(213), 615(213), 622(0), 631(7), 631(7), 649(0), 1970(1330), 1970(1330), 2012(0), 2113(0), 2113(0), 2118(975), 2118(975), 2130(0), 2151(3186), 2177(975), 2177(975), 2228(0) | 47(0), 52(0), 52(0), 56(0), 56(0), 56(0), 64(0), 66(0), 72(0), 72(0), 83(0), 83(0), 86(1), 88(0), 88(0), 90(0), 90(0), 105(0), 105(0), 112(0), 115(0), 138(0), 138(0), 138(0), 176(0), 201(7), 201(7), 324(51), 324(51), 337(0), 347(0), 370(0), 370(0), 391(0), 391(0), 394(150), 394(150), 401(45), 410(33), 421(0), 421(0), 436(0), 437(1), 437(1), 447(0), 474(7), 474(7), 483(0), 489(0), 495(0), 495(0), 500(4), 500(4), 506(50), 564(0), 564(0), 570(80), 604(199), 604(199), 611(0), 619(6), 619(6), 636(0), 1983(1253), 1983(1253), 2021(0), 2118(0), 2118(0), 2122(969), 2122(969), 2134(0), 2155(3082), 2179(941), 2179(941), 2229(0) | 39(0), 47(0), 47(0), 53(0), 53(0), 58(0), 62(0), 71(0), 73(0), 73(0), 75(0), 75(0), 82(0), 82(0), 83(1), 87(0), 87(0), 99(0), 102(0), 102(0), 106(0), 132(0), 132(0), 139(0), 166(0), 201(3), 201(3), 319(0), 326(60), 326(60), 335(0), 359(0), 359(0), 388(123), 388(123), 393(0), 393(0), 397(0), 410(59), 419(0), 419(0), 424(0), 437(1), 437(1), 445(0), 461(0), 469(9), 469(9), 481(0), 481(0), 486(51), 494(0), 494(2), 494(2), 550(0), 550(0), 555(74), 589(170), 589(170), 589(0), 602(2), 602(2), 623(0), 1863(978), 1863(978), 1888(0), 1986(0), 1986(0), 1995(686), 1995(686), 2006(0), 2021(2694), 2052(943), 2052(943), 2096(0) | 42(0), 46(0), 46(0), 53(0), 53(0), 55(0), 59(0), 68(0), 68(0), 74(0), 75(0), 75(0), 80(1), 81(0), 81(0), 84(0), 84(0), 99(0), 99(0), 100(0), 105(0), 128(0), 128(0), 143(0), 161(0), 193(3), 193(3), 307(49), 307(49), 318(0), 320(0), 346(0), 346(0), 377(107), 377(107), 381(0), 381(0), 386(0), 399(53), 408(0), 408(0), 417(0), 430(1), 430(1), 439(0), 455(0), 461(8), 461(8), 467(0), 467(0), 472(46), 485(0), 486(3), 486(3), 535(0), 535(0), 539(67), 579(162), 579(162), 579(0), 592(1), 592(1), 612(0), 1875(932), 1875(932), 1898(0), 1990(0), 1990(0), 1997(688), 1997(688), 2008(0), 2023(2607), 2053(907), 2053(907), 2097(0) |

**Table S22** Harmonic frequencies ( $\text{cm}^{-1}$ ) and IR intensities (KM/Mole) of  $\text{Ru}_3(\text{CO})_{11}$  (**11-1**)

| MPW1PW91/SDD                                                                                                                                                                                                                                                                                                                                                                                                                                                                                                                                                                                                   | MPW1PW91/LANL2DZ                                                                                                                                                                                                                                                                                                                                                                                                                                                                                                                                                                                               | BP86/SDD                                                                                                                                                                                                                                                                                                                                                                                                                                                                                                                                                                                                    | BP86/LANL2DZ                                                                                                                                                                                                                                                                                                                                                                                                                                                                                                                                                                                             |
|----------------------------------------------------------------------------------------------------------------------------------------------------------------------------------------------------------------------------------------------------------------------------------------------------------------------------------------------------------------------------------------------------------------------------------------------------------------------------------------------------------------------------------------------------------------------------------------------------------------|----------------------------------------------------------------------------------------------------------------------------------------------------------------------------------------------------------------------------------------------------------------------------------------------------------------------------------------------------------------------------------------------------------------------------------------------------------------------------------------------------------------------------------------------------------------------------------------------------------------|-------------------------------------------------------------------------------------------------------------------------------------------------------------------------------------------------------------------------------------------------------------------------------------------------------------------------------------------------------------------------------------------------------------------------------------------------------------------------------------------------------------------------------------------------------------------------------------------------------------|----------------------------------------------------------------------------------------------------------------------------------------------------------------------------------------------------------------------------------------------------------------------------------------------------------------------------------------------------------------------------------------------------------------------------------------------------------------------------------------------------------------------------------------------------------------------------------------------------------|
| 33(0), 38(0), 47(1), 49(0), 52(0), 58(0), 66(0), 69(0), 78(0), 81(0), 83(0), 85(0), 87(0), 91(0), 93(0), 97(0), 104(0), 105(0), 111(1), 112(0), 120(1), 143(2), 155(0), 165(1), 199(0), 326(19), 371(12), 388(10), 393(8), 394(3), 401(5), 406(4), 417(2), 430(1), 439(2), 444(32), 446(7), 455(6), 457(9), 464(13), 467(31), 476(8), 480(9), 483(7), 494(12), 496(18), 507(7), 524(5), 536(2), 553(131), 567(67), 571(18), 574(4), 581(83), 594(123), 597(179), 609(148), 612(109), 1991(508), 2064(417), 2095(346), 2104(184), 2108(188), 2117(99), 2133(2086), 2138(283), 2142(2415), 2157(1848), 2212(159) | 31(0), 38(0), 47(1), 47(0), 51(0), 57(0), 64(0), 67(0), 76(0), 78(0), 80(0), 83(0), 85(0), 90(0), 90(0), 95(0), 102(0), 103(0), 109(1), 111(0), 119(1), 140(2), 149(0), 161(1), 193(0), 315(18), 360(11), 375(7), 378(3), 382(10), 389(6), 393(5), 403(3), 417(4), 423(7), 427(5), 435(21), 443(24), 446(10), 450(29), 453(3), 464(1), 466(12), 468(5), 480(18), 484(12), 493(5), 511(4), 521(3), 542(114), 551(47), 555(28), 561(17), 570(83), 582(47), 583(283), 592(95), 598(70), 1998(524), 2069(408), 2099(357), 2108(189), 2112(167), 2122(79), 2136(2099), 2143(168), 2146(2355), 2159(1803), 2213(155) | 29(0), 33(0), 45(0), 48(0), 54(0), 54(0), 59(1), 63(0), 74(0), 76(0), 79(0), 80(0), 82(0), 85(0), 87(0), 91(0), 96(1), 98(0), 100(1), 104(0), 113(1), 143(1), 147(0), 156(2), 185(0), 297(18), 353(5), 368(14), 369(3), 371(5), 376(3), 380(2), 391(2), 414(3), 416(5), 426(22), 429(12), 441(15), 446(5), 449(14), 451(6), 457(1), 462(14), 468(21), 473(4), 479(4), 484(7), 497(5), 505(3), 525(90), 535(28), 541(15), 544(23), 546(99), 563(58), 565(171), 576(130), 580(101), 1861(402), 1936(398), 1974(207), 1983(259), 1986(83), 1993(126), 2008(1836), 2012(191), 2018(2088), 2033(1285), 2081(150) | 26(0), 33(0), 44(0), 47(0), 52(0), 54(0), 58(0), 62(0), 72(0), 73(0), 76(0), 77(0), 80(0), 83(0), 85(0), 89(0), 93(0), 97(0), 99(1), 103(1), 112(1), 139(1), 142(0), 152(2), 179(0), 287(17), 343(4), 356(2), 357(6), 359(10), 366(4), 368(2), 378(3), 401(4), 403(7), 413(10), 415(22), 426(25), 435(5), 438(2), 438(6), 446(1), 450(16), 456(16), 464(5), 467(5), 473(5), 485(4), 493(5), 513(72), 520(20), 527(28), 531(41), 536(83), 550(74), 554(182), 561(104), 569(53), 1870(407), 1941(389), 1978(207), 1985(273), 1989(73), 1996(113), 2009(1803), 2014(179), 2021(2032), 2034(1223), 2081(143) |



**Table S23** Harmonic frequencies ( $\text{cm}^{-1}$ ) and IR intensities (KM/Mole) of  $\text{Ru}_3(\text{CO})_{11}$  (**11-2**)

| MPW1PW91/SDD                                                                                                                                                                                                                                                                                                                                                                                                                                                                                                                                                                                                   | MPW1PW91/LANL2DZ                                                                                                                                                                                                                                                                                                                                                                                                                                                                                                                                                                                            | BP86/SDD                                                                                                                                                                                                                                                                                                                                                                                                                                                                                                                                                                                                  | BP86/LANL2DZ                                                                                                                                                                                                                                                                                                                                                                                                                                                                                                                                                                                             |
|----------------------------------------------------------------------------------------------------------------------------------------------------------------------------------------------------------------------------------------------------------------------------------------------------------------------------------------------------------------------------------------------------------------------------------------------------------------------------------------------------------------------------------------------------------------------------------------------------------------|-------------------------------------------------------------------------------------------------------------------------------------------------------------------------------------------------------------------------------------------------------------------------------------------------------------------------------------------------------------------------------------------------------------------------------------------------------------------------------------------------------------------------------------------------------------------------------------------------------------|-----------------------------------------------------------------------------------------------------------------------------------------------------------------------------------------------------------------------------------------------------------------------------------------------------------------------------------------------------------------------------------------------------------------------------------------------------------------------------------------------------------------------------------------------------------------------------------------------------------|----------------------------------------------------------------------------------------------------------------------------------------------------------------------------------------------------------------------------------------------------------------------------------------------------------------------------------------------------------------------------------------------------------------------------------------------------------------------------------------------------------------------------------------------------------------------------------------------------------|
| -23(0), 30(0), 36(0), 37(0), 41(0), 52(0), 68(0), 70(0), 74(0), 76(0), 88(0), 90(0), 91(0), 93(0), 96(0), 100(1), 108(0), 111(0), 114(0), 117(0), 139(0), 147(2), 148(0), 154(2), 190(0), 361(11), 391(0), 395(3), 396(0), 402(2), 405(1), 406(5), 418(11), 439(3), 442(1), 450(9), 455(1), 455(10), 459(6), 464(37), 465(14), 469(56), 476(14), 485(5), 492(25), 500(15), 513(6), 537(0), 539(0), 571(14), 574(39), 582(20), 585(16), 595(84), 603(58), 604(48), 624(245), 631(200), 2074(154), 2083(402), 2095(294), 2100(378), 2110(59), 2119(268), 2137(2787), 2137(121), 2147(2189), 2162(1804), 2219(69) | -22(0), 31(0), 35(0), 39(0), 42(0), 51(0), 66(0), 68(0), 72(0), 75(0), 86(0), 88(0), 89(0), 92(0), 93(0), 99(1), 107(0), 110(0), 113(0), 115(0), 138(0), 144(3), 148(0), 153(1), 183(0), 355(8), 376(0), 381(3), 382(0), 389(4), 390(1), 394(2), 405(11), 424(12), 428(0), 440(27), 440(1), 441(5), 445(7), 451(18), 454(43), 455(24), 464(11), 470(7), 477(17), 483(17), 504(4), 524(0), 525(0), 556(11), 558(35), 568(19), 576(17), 586(86), 593(4), 593(87), 608(188), 616(214), 2080(116), 2088(407), 2099(288), 2103(350), 2114(53), 2122(215), 2139(2768), 2140(78), 2150(2226), 2163(1742), 2219(62) | -21(0), 28(0), 32(0), 33(0), 38(0), 48(0), 64(0), 64(0), 69(0), 70(0), 80(0), 83(0), 86(0), 87(0), 90(0), 94(1), 98(1), 101(0), 104(0), 108(0), 127(0), 135(1), 136(0), 141(1), 174(0), 342(4), 366(2), 367(0), 373(0), 375(1), 384(0), 388(2), 399(1), 423(6), 433(1), 434(3), 435(28), 445(10), 448(1), 450(50), 452(11), 453(13), 459(10), 466(11), 477(7), 483(9), 499(1), 506(1), 510(0), 537(37), 539(11), 547(12), 558(28), 564(42), 573(69), 579(7), 590(148), 598(239), 1946(245), 1966(276), 1974(161), 1981(307), 1989(131), 1995(384), 2010(2255), 2012(52), 2023(1696), 2040(1415), 2088(60) | -20(0), 28(0), 30(0), 35(0), 39(0), 47(0), 63(0), 63(0), 68(0), 69(0), 79(0), 80(0), 83(0), 87(0), 87(1), 93(1), 98(1), 100(0), 104(0), 107(0), 127(0), 133(1), 136(0), 140(1), 169(0), 338(3), 352(3), 353(0), 360(0), 362(1), 371(0), 376(1), 387(1), 408(13), 420(33), 421(1), 423(1), 434(9), 436(2), 438(31), 440(13), 443(17), 449(7), 453(13), 464(5), 471(8), 491(1), 493(1), 497(0), 524(32), 525(8), 534(12), 552(13), 555(59), 563(51), 570(16), 576(117), 585(240), 1953(194), 1969(290), 1975(163), 1983(290), 1991(114), 1997(362), 2011(2251), 2014(38), 2026(1680), 2040(1367), 2087(51) |

**Table S24** Harmonic frequencies (cm<sup>-1</sup>) and IR intensities (KM/Mole) of Ru<sub>3</sub>(CO)<sub>11</sub> (**11-3**)

| MPW1PW91/SDD                                                                                                                                                                                                                                                                                                                                                                                                                                                                                                                                                                                          | MPW1PW91/LANL2DZ                                                                                                                                                                                                                                                                                                                                                                                                                                                                                                                                                                                          | BP86/SDD                                                                                                                                                                                                                                                                                                                                                                                                                                                                                                                                                                                          | BP86/LANL2DZ                                                                                                                                                                                                                                                                                                                                                                                                                                                                                                                                                                                      |
|-------------------------------------------------------------------------------------------------------------------------------------------------------------------------------------------------------------------------------------------------------------------------------------------------------------------------------------------------------------------------------------------------------------------------------------------------------------------------------------------------------------------------------------------------------------------------------------------------------|-----------------------------------------------------------------------------------------------------------------------------------------------------------------------------------------------------------------------------------------------------------------------------------------------------------------------------------------------------------------------------------------------------------------------------------------------------------------------------------------------------------------------------------------------------------------------------------------------------------|---------------------------------------------------------------------------------------------------------------------------------------------------------------------------------------------------------------------------------------------------------------------------------------------------------------------------------------------------------------------------------------------------------------------------------------------------------------------------------------------------------------------------------------------------------------------------------------------------|---------------------------------------------------------------------------------------------------------------------------------------------------------------------------------------------------------------------------------------------------------------------------------------------------------------------------------------------------------------------------------------------------------------------------------------------------------------------------------------------------------------------------------------------------------------------------------------------------|
| 7(0), 40(0), 48(0), 56(0), 57(0), 57(0), 67(0), 68(0), 69(0), 77(0), 79(0), 81(1), 91(0), 94(0), 94(2), 94(0), 103(0), 104(0), 106(0), 113(0), 116(0), 148(6), 176(3), 236(0), 250(2), 355(1), 364(0), 380(6), 383(0), 393(21), 395(0), 406(0), 411(33), 421(31), 429(47), 439(3), 441(3), 442(1), 450(0), 453(0), 460(51), 478(52), 480(4), 490(22), 495(0), 513(3), 533(39), 540(0), 550(13), 553(52), 572(1), 576(0), 578(0), 580(85), 597(136), 605(19), 622(261), 638(19), 1937(213), 1955(794), 2097(0), 2104(1713), 2105(39), 2112(417), 2131(182), 2142(3259), 2162(978), 2165(1418), 2220(0) | -13(0), 39(0), 49(0), 55(0), 55(0), 55(0), 64(0), 67(0), 67(0), 74(0), 77(0), 80(1), 91(1), 91(0), 92(0), 93(0), 101(0), 101(0), 102(0), 112(0), 115(0), 142(5), 168(2), 230(0), 242(2), 348(1), 356(0), 373(3), 377(0), 382(0), 384(13), 393(0), 399(26), 409(40), 417(54), 428(1), 433(14), 434(0), 441(0), 443(4), 448(35), 464(43), 468(1), 477(24), 483(1), 507(10), 523(40), 526(0), 538(10), 549(42), 559(13), 562(0), 563(69), 566(1), 590(144), 595(5), 610(274), 626(18), 1950(222), 1968(752), 2103(0), 2108(1674), 2110(47), 2116(430), 2135(184), 2147(3161), 2167(873), 2168(1345), 2222(0) | 6(0), 37(0), 44(0), 50(0), 54(0), 56(0), 65(0), 65(0), 67(0), 73(0), 75(0), 77(1), 83(0), 88(0), 88(1), 89(0), 96(0), 98(0), 102(0), 109(0), 111(0), 139(4), 164(3), 223(0), 238(1), 332(1), 345(0), 362(1), 374(1), 380(0), 384(4), 384(0), 395(0), 408(55), 414(24), 425(9), 428(2), 428(0), 434(0), 441(2), 448(20), 464(0), 465(54), 469(12), 486(0), 487(1), 507(20), 509(0), 518(11), 523(55), 544(3), 545(0), 546(1), 549(64), 569(89), 574(12), 590(195), 606(17), 1833(199), 1845(514), 1967(0), 1978(56), 1982(1205), 1988(298), 2004(148), 2011(2673), 2031(1069), 2040(1269), 2086(0) | -13(0), 37(0), 45(0), 49(0), 52(0), 54(0), 62(0), 64(0), 65(0), 70(0), 73(0), 75(1), 83(0), 85(0), 86(1), 88(0), 94(0), 97(0), 98(0), 108(0), 109(0), 134(3), 158(3), 218(0), 230(1), 328(1), 337(0), 355(1), 363(0), 371(0), 374(2), 374(0), 383(0), 399(52), 404(26), 414(17), 416(1), 422(1), 426(0), 432(0), 440(15), 453(0), 455(43), 462(15), 477(0), 480(0), 496(0), 499(21), 506(9), 521(49), 530(0), 531(0), 532(63), 541(0), 562(100), 565(3), 579(203), 597(18), 1846(202), 1857(490), 1972(0), 1982(49), 1985(1220), 1991(330), 2007(138), 2015(2611), 2036(942), 2042(1203), 2088(0) |

**Table S25** Harmonic frequencies ( $\text{cm}^{-1}$ ) and IR intensities (KM/Mole) of  $\text{Ru}_3(\text{CO})_{11}$  (**11-4**)

| MPW1PW91/SDD                                                                                                                                                                                                                                                                                                                                                                                                                                                                                                                                                                                                | MPW1PW91/LANL2DZ                                                                                                                                                                                                                                                                                                                                                                                                                                                                                                                                                                                           | BP86/SDD                                                                                                                                                                                                                                                                                                                                                                                                                                                                                                                                                                                               | BP86/LANL2DZ                                                                                                                                                                                                                                                                                                                                                                                                                                                                                                                                                                                            |
|-------------------------------------------------------------------------------------------------------------------------------------------------------------------------------------------------------------------------------------------------------------------------------------------------------------------------------------------------------------------------------------------------------------------------------------------------------------------------------------------------------------------------------------------------------------------------------------------------------------|------------------------------------------------------------------------------------------------------------------------------------------------------------------------------------------------------------------------------------------------------------------------------------------------------------------------------------------------------------------------------------------------------------------------------------------------------------------------------------------------------------------------------------------------------------------------------------------------------------|--------------------------------------------------------------------------------------------------------------------------------------------------------------------------------------------------------------------------------------------------------------------------------------------------------------------------------------------------------------------------------------------------------------------------------------------------------------------------------------------------------------------------------------------------------------------------------------------------------|---------------------------------------------------------------------------------------------------------------------------------------------------------------------------------------------------------------------------------------------------------------------------------------------------------------------------------------------------------------------------------------------------------------------------------------------------------------------------------------------------------------------------------------------------------------------------------------------------------|
| -13(0), 12(0), 29(0), 47(0), 69(0), 72(0), 73(0), 75(0), 76(0), 81(0), 83(0), 89(0), 92(0), 94(0), 95(0), 101(0), 109(0), 123(0), 145(0), 160(0), 164(4), 180(1), 195(0), 211(0), 231(2), 317(0), 349(6), 370(13), 372(0), 381(3), 385(4), 394(6), 408(3), 425(13), 428(6), 432(11), 434(19), 443(0), 457(4), 461(7), 471(5), 472(0), 477(1), 489(1), 492(13), 492(2), 504(15), 507(3), 512(160), 539(8), 545(6), 556(177), 568(12), 573(45), 584(11), 586(208), 595(74), 611(306), 1831(485), 1892(248), 2103(20), 2118(169), 2127(129), 2130(128), 2134(666), 2142(1985), 2167(1933), 2171(2371), 2207(9) | -18(0), 8(0), 28(0), 46(0), 66(0), 69(0), 70(0), 73(0), 73(0), 79(0), 80(0), 86(1), 89(0), 90(0), 91(0), 98(0), 106(0), 123(0), 140(0), 155(0), 157(4), 170(0), 191(0), 204(0), 223(2), 306(1), 334(3), 355(17), 361(1), 368(4), 368(3), 376(6), 394(3), 409(11), 412(9), 416(16), 419(8), 429(0), 444(6), 446(5), 456(1), 461(1), 463(0), 470(2), 475(10), 479(1), 488(38), 492(130), 494(2), 522(12), 532(1), 536(157), 550(21), 556(17), 568(90), 570(103), 576(62), 594(302), 1856(480), 1913(259), 2107(27), 2121(131), 2131(146), 2133(132), 2137(652), 2146(1877), 2169(1868), 2173(2332), 2208(14) | -9(0), 6(0), 26(0), 43(0), 64(0), 68(0), 68(0), 70(0), 71(0), 76(0), 78(0), 84(0), 86(0), 89(0), 89(0), 95(0), 100(0), 118(0), 136(1), 147(0), 153(2), 166(2), 187(1), 194(0), 217(2), 310(0), 331(6), 350(6), 351(2), 359(0), 360(3), 377(4), 384(1), 404(3), 406(15), 415(4), 419(15), 423(1), 433(0), 448(6), 454(0), 456(3), 463(4), 464(2), 476(0), 477(2), 481(12), 487(119), 491(3), 511(5), 520(8), 525(174), 537(14), 539(18), 552(24), 554(164), 563(105), 576(209), 1729(305), 1794(211), 1975(8), 1990(103), 1998(189), 2000(178), 2004(627), 2011(1590), 2038(1594), 2042(1900), 2073(14) | -15(0), -11(0), 23(0), 42(0), 61(0), 65(0), 66(0), 67(0), 69(0), 74(0), 75(0), 81(0), 83(0), 85(0), 85(0), 93(0), 98(0), 119(0), 130(1), 142(0), 146(3), 157(1), 183(1), 187(0), 209(2), 299(0), 318(4), 335(9), 339(2), 345(1), 346(0), 360(4), 374(1), 388(3), 390(18), 399(1), 405(13), 409(0), 419(1), 434(6), 437(0), 443(9), 449(3), 452(10), 465(0), 466(0), 467(15), 471(98), 479(2), 498(10), 507(4), 508(153), 519(16), 524(6), 537(40), 539(127), 545(92), 560(209), 1751(293), 1817(225), 1977(11), 1991(65), 2000(232), 2002(184), 2006(617), 2013(1465), 2039(1553), 2042(1875), 2072(21) |

**Table S26** Harmonic frequencies ( $\text{cm}^{-1}$ ) and IR intensities (KM/Mole) of  $\text{Ru}_3(\text{CO})_{10}$  (10-1)

| MPW1PW91/SDD                                                                                                                                                                                                                                                                                                                                                                                                                                                                                                                                                                                         | MPW1PW91/LANL2DZ                                                                                                                                                                                                                                                                                                                                                                                                                                                                                                                                                                                    | BP86/SDD                                                                                                                                                                                                                                                                                                                                                                                                                                                                                                                                                                                         | BP86/LANL2DZ                                                                                                                                                                                                                                                                                                                                                                                                                                                                                                                                                                                     |
|------------------------------------------------------------------------------------------------------------------------------------------------------------------------------------------------------------------------------------------------------------------------------------------------------------------------------------------------------------------------------------------------------------------------------------------------------------------------------------------------------------------------------------------------------------------------------------------------------|-----------------------------------------------------------------------------------------------------------------------------------------------------------------------------------------------------------------------------------------------------------------------------------------------------------------------------------------------------------------------------------------------------------------------------------------------------------------------------------------------------------------------------------------------------------------------------------------------------|--------------------------------------------------------------------------------------------------------------------------------------------------------------------------------------------------------------------------------------------------------------------------------------------------------------------------------------------------------------------------------------------------------------------------------------------------------------------------------------------------------------------------------------------------------------------------------------------------|--------------------------------------------------------------------------------------------------------------------------------------------------------------------------------------------------------------------------------------------------------------------------------------------------------------------------------------------------------------------------------------------------------------------------------------------------------------------------------------------------------------------------------------------------------------------------------------------------|
| 8(0), 27(0), 44(0), 49(0), 63(0), 71(1),<br>76(0), 80(0), 81(0), 82(0), 85(0), 91(1),<br>95(0), 95(0), 98(0), 106(0), 142(0),<br>146(2), 156(0), 167(1), 184(0), 197(3),<br>208(0), 312(1), 327(33), 346(14),<br>359(10), 396(3), 399(6), 413(16),<br>424(4), 430(6), 436(3), 439(1), 447(4),<br>455(13), 464(5), 470(9), 478(31),<br>484(10), 488(5), 502(43), 523(9),<br>527(1), 538(65), 556(54), 567(103),<br>571(83), 577(17), 581(83), 591(208),<br>614(10), 625(113), 1923(384),<br>1979(299), 2014(1301), 2047(196),<br>2104(340), 2118(555), 2133(580),<br>2147(2595), 2158(2379), 2194(46) | 17(1), 31(0), 41(0), 48(0), 57(0), 65(0),<br>69(1), 76(0), 78(0), 79(0), 84(0), 85(0),<br>89(0), 93(0), 94(0), 95(0), 115(1),<br>142(1), 148(1), 156(1), 194(1), 199(1),<br>218(0), 306(4), 329(5), 343(28),<br>363(15), 380(8), 393(9), 407(4), 416(2),<br>418(3), 427(4), 436(3), 437(4), 441(11),<br>446(12), 453(7), 461(4), 470(41),<br>487(19), 499(4), 504(11), 514(4),<br>531(39), 541(56), 548(94), 563(150),<br>568(60), 579(38), 579(127), 603(65),<br>633(149), 1926(412), 1970(397),<br>2045(1004), 2088(213), 2103(465),<br>2122(506), 2137(431), 2149(2564),<br>2160(2149), 2196(78) | 18(0), 35(0), 43(0), 48(0), 61(0), 70(0),<br>75(0), 77(0), 80(0), 81(0), 84(0), 86(0),<br>91(0), 94(0), 97(0), 112(0), 132(0),<br>146(0), 166(0), 173(2), 180(0), 197(2),<br>204(0), 290(1), 309(22), 325(10),<br>338(10), 358(3), 373(7), 384(18),<br>389(2), 395(8), 410(2), 414(1), 432(5),<br>440(4), 451(1), 465(7), 468(17),<br>477(13), 482(19), 489(48), 493(1),<br>499(53), 505(4), 522(64), 527(34),<br>544(15), 547(7), 560(24), 565(199),<br>575(78), 580(2), 1829(284), 1868(146),<br>1878(1026), 1905(233), 1982(213),<br>1994(397), 1999(645), 2021(2164),<br>2030(1962), 2061(8) | 21(0), 31(0), 40(0), 45(0), 60(0), 67(0),<br>71(0), 74(0), 77(0), 78(0), 80(0), 84(0),<br>88(0), 90(0), 94(0), 108(0), 127(0),<br>136(0), 157(0), 167(2), 170(0), 191(2),<br>198(0), 274(2), 303(20), 314(11),<br>321(3), 353(8), 361(7), 369(15), 380(5),<br>389(2), 394(4), 403(0), 421(6), 430(3),<br>441(1), 456(5), 460(13), 465(13),<br>473(6), 482(31), 485(12), 488(52),<br>498(8), 511(64), 519(34), 531(11),<br>535(21), 548(28), 550(176), 564(6),<br>567(74), 1834(316), 1870(153),<br>1888(985), 1918(230), 1984(204),<br>1997(362), 2003(592), 2022(2099),<br>2032(1944), 2062(10) |

**Table S27** Harmonic frequencies (cm<sup>-1</sup>) and IR intensities (KM/Mole) of Ru<sub>3</sub>(CO)<sub>10</sub> (**10-2**)

| MPW1PW91/SDD                                                                                                                                                                                                                                                                                                                                                                                                                                                                                                                                                 | MPW1PW91/LANL2DZ                                                                                                                                                                                                                                                                                                                                                                                                                                                                                                                                          | BP86/SDD                                                                                                                                                                                                                                                                                                                                                                                                                                                                                                                                            | BP86/LANL2DZ                                                                                                                                                                                                                                                                                                                                                                                                                                                                                                                                      |
|--------------------------------------------------------------------------------------------------------------------------------------------------------------------------------------------------------------------------------------------------------------------------------------------------------------------------------------------------------------------------------------------------------------------------------------------------------------------------------------------------------------------------------------------------------------|-----------------------------------------------------------------------------------------------------------------------------------------------------------------------------------------------------------------------------------------------------------------------------------------------------------------------------------------------------------------------------------------------------------------------------------------------------------------------------------------------------------------------------------------------------------|-----------------------------------------------------------------------------------------------------------------------------------------------------------------------------------------------------------------------------------------------------------------------------------------------------------------------------------------------------------------------------------------------------------------------------------------------------------------------------------------------------------------------------------------------------|---------------------------------------------------------------------------------------------------------------------------------------------------------------------------------------------------------------------------------------------------------------------------------------------------------------------------------------------------------------------------------------------------------------------------------------------------------------------------------------------------------------------------------------------------|
| -39(1), 34(0), 43(0), 44(0), 59(0), 66(0), 76(1), 80(0), 81(0), 84(0), 85(0), 90(0), 93(0), 100(0), 101(0), 104(0), 131(1), 152(0), 161(0), 163(0), 184(0), 192(2), 214(0), 310(0), 310(20), 335(11), 344(0), 374(27), 376(12), 407(1), 411(6), 412(5), 425(4), 429(11), 454(0), 459(0), 460(2), 476(7), 484(21), 488(11), 506(17), 508(59), 516(44), 530(21), 542(110), 554(1), 559(44), 572(51), 576(1), 588(22), 595(281), 604(75), 613(29), 1967(495), 1972(4), 1993(1428), 2029(363), 2105(216), 2121(333), 2131(688), 2143(2858), 2158(2560), 2194(15) | -58(2), 30(0), 39(0), 42(0), 51(0), 68(0), 73(0), 77(0), 78(0), 81(0), 87(0), 91(0), 93(0), 95(0), 104(0), 108(0), 122(0), 137(1), 153(1), 161(0), 177(1), 185(3), 211(0), 277(11), 304(0), 326(10), 333(2), 368(31), 368(14), 391(5), 401(6), 414(7), 417(3), 422(12), 445(2), 447(0), 454(0), 466(28), 469(1), 476(5), 495(12), 496(41), 510(21), 518(47), 526(70), 542(9), 544(63), 565(64), 568(31), 574(15), 585(240), 593(5), 600(95), 1957(701), 1959(0), 2003(1276), 2042(394), 2107(171), 2125(305), 2138(716), 2147(2642), 2163(2455), 2197(33) | -16(1), 36(0), 41(0), 44(0), 63(0), 63(0), 73(1), 77(0), 80(0), 80(0), 83(0), 86(0), 89(0), 94(0), 98(0), 99(0), 135(1), 145(0), 162(0), 171(2), 181(0), 195(1), 204(0), 293(0), 315(18), 321(6), 330(4), 354(20), 359(8), 381(0), 390(9), 391(7), 407(2), 409(6), 437(3), 442(0), 446(2), 464(6), 475(21), 480(12), 490(38), 490(51), 491(0), 501(10), 513(93), 519(4), 530(27), 538(33), 544(3), 561(15), 565(191), 571(60), 581(41), 1851(441), 1858(5), 1877(1001), 1907(239), 1981(190), 1994(359), 1998(664), 2018(2259), 2030(1996), 2060(2) | -25(1), 35(0), 39(0), 40(0), 59(0), 61(0), 70(0), 74(0), 77(0), 78(0), 81(0), 84(0), 87(0), 91(0), 95(0), 95(0), 131(0), 135(0), 157(0), 165(2), 176(0), 190(1), 197(0), 278(0), 286(15), 312(8), 316(6), 345(18), 354(8), 372(3), 378(8), 378(3), 395(4), 396(5), 429(3), 432(1), 434(2), 455(6), 467(21), 471(10), 481(29), 482(44), 483(7), 489(6), 500(76), 510(3), 516(32), 530(30), 535(1), 550(19), 553(191), 561(60), 564(20), 1853(502), 1860(4), 1886(932), 1916(256), 1983(186), 1997(321), 2002(619), 2020(2182), 2032(1959), 2061(3) |

**Table S28** Harmonic frequencies (cm<sup>-1</sup>) and IR intensities (KM/Mole) of Ru<sub>3</sub>(CO)<sub>10</sub> (10-3)

| MPW1PW91/SDD                                                                                                                                                                                                                                                                                                                                                                                                                                                                                                                                              | MPW1PW91/LANL2DZ                                                                                                                                                                                                                                                                                                                                                                                                                                                                                                                                       | BP86/SDD                                                                                                                                                                                                                                                                                                                                                                                                                                                                                                                                            | BP86/LANL2DZ                                                                                                                                                                                                                                                                                                                                                                                                                                                                                                                                      |
|-----------------------------------------------------------------------------------------------------------------------------------------------------------------------------------------------------------------------------------------------------------------------------------------------------------------------------------------------------------------------------------------------------------------------------------------------------------------------------------------------------------------------------------------------------------|--------------------------------------------------------------------------------------------------------------------------------------------------------------------------------------------------------------------------------------------------------------------------------------------------------------------------------------------------------------------------------------------------------------------------------------------------------------------------------------------------------------------------------------------------------|-----------------------------------------------------------------------------------------------------------------------------------------------------------------------------------------------------------------------------------------------------------------------------------------------------------------------------------------------------------------------------------------------------------------------------------------------------------------------------------------------------------------------------------------------------|---------------------------------------------------------------------------------------------------------------------------------------------------------------------------------------------------------------------------------------------------------------------------------------------------------------------------------------------------------------------------------------------------------------------------------------------------------------------------------------------------------------------------------------------------|
| -16(0), 25(0), 38(0), 58(0), 64(0), 71(0), 74(0), 76(0), 82(0), 87(0), 91(0), 91(0), 95(0), 100(0), 102(0), 113(0), 116(0), 142(1), 156(0), 169(0), 203(1), 206(1), 221(0), 287(1), 323(2), 378(1), 385(0), 391(5), 399(0), 407(6), 412(0), 428(62), 439(5), 440(20), 447(2), 448(31), 457(13), 466(0), 482(12), 483(18), 496(6), 496(5), 507(17), 525(11), 535(8), 545(0), 548(95), 556(27), 575(40), 575(0), 592(68), 599(186), 620(206), 1840(473), 1947(388), 2096(116), 2109(47), 2118(330), 2125(263), 2134(1192), 2146(2785), 2167(2239), 2200(81) | -21(0), 26(0), 33(0), 57(0), 62(0), 67(0), 72(0), 74(0), 80(0), 85(0), 88(0), 88(0), 95(0), 98(0), 100(0), 111(0), 115(0), 147(1), 151(0), 169(0), 194(1), 199(1), 213(0), 263(1), 319(2), 365(2), 371(0), 378(6), 387(1), 392(4), 396(0), 410(65), 423(6), 425(11), 426(26), 436(0), 447(12), 450(0), 468(16), 476(9), 482(8), 483(2), 498(9), 513(12), 518(8), 533(94), 533(0), 545(38), 559(42), 562(0), 578(37), 584(161), 606(191), 1869(492), 1945(373), 2101(124), 2115(37), 2123(309), 2130(239), 2138(1148), 2150(2668), 2171(2165), 2201(80) | -12(0), 25(0), 35(0), 54(0), 59(0), 67(0), 69(0), 70(0), 79(0), 82(0), 86(0), 87(0), 89(0), 94(0), 96(0), 104(0), 110(0), 127(1), 145(0), 153(0), 194(0), 197(0), 205(0), 276(2), 301(2), 355(1), 360(0), 371(0), 371(3), 388(2), 391(2), 405(45), 412(7), 415(11), 427(16), 428(3), 447(9), 454(2), 468(15), 471(2), 478(0), 479(3), 493(5), 504(22), 512(8), 520(60), 527(4), 527(22), 541(0), 545(25), 560(102), 570(145), 580(123), 1730(324), 1851(304), 1968(96), 1980(41), 1990(328), 1996(280), 2004(981), 2016(2298), 2040(1755), 2067(93) | -13(0), 26(0), 31(0), 52(0), 57(0), 63(0), 66(0), 68(0), 77(0), 80(0), 83(0), 84(0), 88(0), 91(0), 94(0), 103(0), 109(0), 133(1), 141(0), 151(0), 188(1), 189(0), 199(0), 255(1), 296(1), 343(1), 348(0), 359(3), 359(0), 375(2), 377(1), 385(44), 396(9), 401(8), 410(11), 418(1), 438(9), 440(2), 455(11), 465(3), 467(0), 468(4), 482(4), 492(22), 499(9), 509(54), 516(26), 518(7), 528(0), 532(38), 547(67), 557(123), 568(117), 1756(334), 1850(289), 1971(91), 1983(34), 1994(337), 1999(263), 2006(935), 2019(2204), 2042(1716), 2067(89) |

**Table S29** Harmonic frequencies (cm<sup>-1</sup>) and IR intensities (KM/Mole) of Ru<sub>3</sub>(CO)<sub>10</sub> (10-4)

| MPW1PW91/SDD                                                                                                                                                                                                                                                                                                                                                                                                                                                                                                                                               | MPW1PW91/LANL2DZ                                                                                                                                                                                                                                                                                                                                                                                                                                                                                                                                         | BP86/SDD                                                                                                                                                                                                                                                                                                                                                                                                                                                                                                                                             | BP86/LANL2DZ                                                                                                                                                                                                                                                                                                                                                                                                                                                                                                                                        |
|------------------------------------------------------------------------------------------------------------------------------------------------------------------------------------------------------------------------------------------------------------------------------------------------------------------------------------------------------------------------------------------------------------------------------------------------------------------------------------------------------------------------------------------------------------|----------------------------------------------------------------------------------------------------------------------------------------------------------------------------------------------------------------------------------------------------------------------------------------------------------------------------------------------------------------------------------------------------------------------------------------------------------------------------------------------------------------------------------------------------------|------------------------------------------------------------------------------------------------------------------------------------------------------------------------------------------------------------------------------------------------------------------------------------------------------------------------------------------------------------------------------------------------------------------------------------------------------------------------------------------------------------------------------------------------------|-----------------------------------------------------------------------------------------------------------------------------------------------------------------------------------------------------------------------------------------------------------------------------------------------------------------------------------------------------------------------------------------------------------------------------------------------------------------------------------------------------------------------------------------------------|
| 11(1), 24(0), 35(0), 51(0), 52(0), 58(1), 67(0), 70(0), 71(1), 78(0), 81(0), 82(0), 86(0), 90(0), 99(0), 99(0), 102(0), 149(1), 154(0), 173(2), 203(1), 208(5), 211(10), 359(4), 359(11), 367(29), 375(5), 381(3), 393(2), 399(0), 405(1), 410(2), 432(92), 438(0), 441(59), 442(120), 451(80), 455(44), 463(1), 488(69), 494(0), 506(34), 506(1), 521(20), 545(72), 554(3), 555(33), 573(103), 596(1), 606(139), 632(15), 656(61), 659(21), 1960(1238), 1961(1283), 2007(8), 2091(24), 2093(742), 2130(1842), 2138(957), 2140(1976), 2150(874), 2199(140) | 15(0), 30(0), 39(0), 50(0), 52(0), 57(1), 65(0), 68(1), 69(0), 78(0), 80(0), 81(0), 83(0), 89(0), 96(0), 98(0), 99(0), 139(1), 145(0), 173(2), 189(1), 200(5), 203(8), 337(11), 343(7), 347(22), 362(5), 375(9), 376(2), 388(2), 400(2), 401(3), 420(87), 425(89), 427(76), 431(40), 445(43), 448(22), 456(1), 470(31), 480(0), 489(2), 495(32), 511(23), 534(61), 551(2), 552(28), 562(61), 585(1), 594(148), 621(17), 637(57), 640(18), 1972(1186), 1973(1243), 2017(11), 2095(31), 2096(637), 2131(1815), 2139(905), 2143(1946), 2153(867), 2199(120) | -16(1), 19(0), 32(0), 41(0), 48(0), 49(0), 62(0), 67(0), 69(1), 74(0), 77(0), 79(0), 82(0), 86(0), 93(0), 94(0), 96(0), 141(1), 146(0), 173(3), 193(1), 198(2), 204(4), 314(0), 343(2), 348(37), 351(11), 364(1), 370(3), 376(1), 383(0), 387(0), 403(9), 406(5), 419(111), 424(99), 430(37), 434(0), 450(7), 463(0), 466(79), 486(1), 503(27), 506(0), 510(58), 539(63), 542(16), 544(68), 571(1), 577(76), 605(15), 630(47), 633(16), 1846(888), 1855(968), 1884(26), 1966(26), 1969(653), 2005(1550), 2012(725), 2018(1576), 2027(813), 2067(147) | -14(1), 25(0), 34(0), 37(0), 44(0), 50(0), 61(0), 65(1), 66(0), 73(0), 75(0), 76(0), 79(0), 84(0), 90(0), 92(0), 93(0), 131(1), 139(0), 169(2), 179(1), 190(2), 197(4), 295(1), 328(4), 329(36), 331(11), 353(3), 355(1), 368(5), 378(1), 380(1), 398(19), 400(1), 408(96), 409(91), 417(35), 427(1), 444(4), 451(0), 457(47), 474(2), 488(20), 490(1), 500(55), 532(87), 539(1), 540(16), 561(0), 565(85), 594(15), 613(40), 616(14), 1857(852), 1866(948), 1894(30), 1969(44), 1970(578), 2003(1483), 2011(708), 2020(1583), 2028(791), 2067(124) |

**Table S30** Harmonic frequencies (cm<sup>-1</sup>) and IR intensities (KM/Mole) of Ru<sub>3</sub>(CO)<sub>10</sub> (10-5)

| MPW1PW91/SDD                                                                                                                                                                                                                                                                                                                                                                                                                                                                                                                                       | MPW1PW91/LANL2DZ                                                                                                                                                                                                                                                                                                                                                                                                                                                                                                                             | BP86/SDD                                                                                                                                                                                                                                                                                                                                                                                                                                                                                                                                   | BP86/LANL2DZ                                                                                                                                                                                                                                                                                                                                                                                                                                                                                                                                  |
|----------------------------------------------------------------------------------------------------------------------------------------------------------------------------------------------------------------------------------------------------------------------------------------------------------------------------------------------------------------------------------------------------------------------------------------------------------------------------------------------------------------------------------------------------|----------------------------------------------------------------------------------------------------------------------------------------------------------------------------------------------------------------------------------------------------------------------------------------------------------------------------------------------------------------------------------------------------------------------------------------------------------------------------------------------------------------------------------------------|--------------------------------------------------------------------------------------------------------------------------------------------------------------------------------------------------------------------------------------------------------------------------------------------------------------------------------------------------------------------------------------------------------------------------------------------------------------------------------------------------------------------------------------------|-----------------------------------------------------------------------------------------------------------------------------------------------------------------------------------------------------------------------------------------------------------------------------------------------------------------------------------------------------------------------------------------------------------------------------------------------------------------------------------------------------------------------------------------------|
| 12(0), 22(0), 22(0), 57(0), 68(0), 70(0), 70(0), 83(1), 83(1), 86(0), 94(0), 95(1), 95(1), 102(1), 102(1), 136(0), 136(0), 140(0), 167(1), 167(1), 210(0), 210(0), 214(0), 379(0), 379(0), 380(0), 396(0), 398(0), 398(0), 408(0), 436(1), 438(16), 438(16), 446(19), 446(19), 462(0), 484(28), 490(0), 490(0), 498(118), 504(4), 504(4), 516(5), 516(5), 529(19), 547(0), 547(0), 561(0), 574(142), 574(142), 589(0), 596(173), 596(173), 1868(384), 2086(0), 2099(3), 2099(3), 2123(266), 2123(266), 2128(2262), 2160(2378), 2160(2377), 2199(2) | 9(0), 20(0), 20(0), 56(0), 66(0), 68(0), 68(0), 81(0), 81(0), 84(0), 92(0), 94(1), 94(1), 99(1), 99(1), 137(0), 137(0), 142(0), 159(1), 159(1), 201(0), 201(0), 204(0), 362(0), 362(0), 365(0), 383(0), 385(1), 385(1), 394(0), 419(1), 423(8), 423(8), 428(27), 428(27), 443(0), 471(59), 481(2), 481(2), 484(80), 490(4), 490(4), 505(7), 505(7), 520(11), 533(2), 533(2), 547(0), 554(120), 554(120), 569(0), 578(159), 578(159), 1898(391), 2090(0), 2103(0), 2103(0), 2126(269), 2126(269), 2132(2177), 2163(2315), 2163(2315), 2199(1) | 10(0), 22(0), 22(0), 52(0), 65(0), 67(0), 67(0), 78(0), 78(0), 81(0), 89(0), 90(0), 90(0), 96(1), 96(1), 127(0), 127(0), 131(0), 154(1), 154(1), 196(0), 202(0), 202(0), 361(0), 361(0), 366(0), 375(0), 379(0), 379(0), 385(0), 413(0), 418(26), 418(26), 427(1), 427(1), 448(0), 462(52), 477(7), 477(7), 483(1), 483(1), 488(61), 504(9), 504(9), 509(9), 519(0), 519(0), 537(0), 542(94), 542(94), 554(0), 565(151), 565(151), 1741(259), 1960(0), 1973(6), 1973(6), 1995(224), 1995(224), 1999(1908), 2034(1865), 2034(1865), 2066(2) | 7(0), 20(0), 20(0), 49(0), 62(0), 64(0), 64(0), 76(0), 76(0), 79(0), 86(0), 90(1), 90(1), 93(1), 93(1), 128(0), 128(0), 132(0), 147(1), 147(1), 184(0), 194(0), 194(0), 346(0), 346(0), 350(0), 363(0), 365(0), 365(0), 372(0), 396(0), 402(25), 402(25), 411(2), 411(2), 432(0), 448(65), 467(13), 467(13), 471(1), 471(1), 477(41), 494(12), 494(12), 503(5), 506(0), 506(0), 523(73), 523(74), 525(0), 536(0), 549(137), 549(137), 1769(265), 1962(0), 1975(2), 1975(2), 1997(216), 1997(216), 2001(1844), 2035(1827), 2035(1827), 2065(1) |



**Table S31** Harmonic frequencies (cm<sup>-1</sup>) and IR intensities (KM/Mole) of Ru<sub>3</sub>(CO)<sub>9</sub> (9-1)

| MPW1PW91/SDD                                                                                                                                                                                                                                                                                                                                                                                                                                                                                             | MPW1PW91/LANL2DZ                                                                                                                                                                                                                                                                                                                                                                                                                                                                                       | BP86/SDD                                                                                                                                                                                                                                                                                                                                                                                                                                                                                             | BP86/LANL2DZ                                                                                                                                                                                                                                                                                                                                                                                                                                                                                        |
|----------------------------------------------------------------------------------------------------------------------------------------------------------------------------------------------------------------------------------------------------------------------------------------------------------------------------------------------------------------------------------------------------------------------------------------------------------------------------------------------------------|--------------------------------------------------------------------------------------------------------------------------------------------------------------------------------------------------------------------------------------------------------------------------------------------------------------------------------------------------------------------------------------------------------------------------------------------------------------------------------------------------------|------------------------------------------------------------------------------------------------------------------------------------------------------------------------------------------------------------------------------------------------------------------------------------------------------------------------------------------------------------------------------------------------------------------------------------------------------------------------------------------------------|-----------------------------------------------------------------------------------------------------------------------------------------------------------------------------------------------------------------------------------------------------------------------------------------------------------------------------------------------------------------------------------------------------------------------------------------------------------------------------------------------------|
| 33(0), 39(0), 45(0), 48(0), 53(0), 61(0), 71(0), 76(0), 77(0), 81(0), 91(0), 93(1), 94(0), 100(0), 102(0), 108(0), 114(0), 148(1), 158(2), 198(0), 204(2), 339(12), 364(9), 381(7), 394(12), 400(17), 419(16), 425(27), 432(29), 445(8), 451(4), 452(3), 466(18), 473(8), 481(10), 489(47), 495(4), 515(12), 518(1), 550(4), 565(34), 571(13), 583(130), 596(61), 599(38), 606(8), 615(10), 633(109), 1950(499), 2066(285), 2083(42), 2096(1145), 2104(608), 2122(2501), 2135(1997), 2158(606), 2202(93) | 34(0), 37(0), 46(0), 47(0), 52(0), 59(0), 70(0), 74(0), 76(0), 80(0), 88(0), 91(0), 92(0), 98(0), 100(0), 106(0), 114(1), 142(1), 152(1), 193(1), 201(1), 329(8), 358(8), 371(8), 384(12), 390(15), 408(8), 415(34), 421(26), 435(7), 445(5), 446(2), 458(18), 463(4), 473(10), 480(35), 486(4), 501(16), 510(1), 540(2), 554(29), 564(11), 576(133), 584(60), 588(22), 596(13), 606(17), 620(112), 1956(482), 2072(291), 2088(36), 2101(1184), 2110(579), 2127(2401), 2139(1894), 2162(577), 2205(97) | 30(0), 33(0), 42(0), 45(0), 50(0), 59(0), 65(0), 67(0), 74(0), 75(0), 85(0), 86(1), 87(0), 93(0), 97(0), 100(0), 126(2), 143(1), 156(1), 194(1), 195(0), 303(2), 347(3), 366(9), 372(12), 385(7), 393(3), 406(24), 417(27), 429(10), 436(14), 443(2), 446(3), 456(2), 460(17), 470(41), 478(4), 485(11), 504(1), 520(2), 535(37), 548(101), 550(18), 561(19), 563(36), 571(19), 581(16), 593(67), 1846(345), 1914(334), 1966(44), 1976(495), 1979(853), 1997(1695), 2009(2032), 2029(457), 2071(131) | 31(0), 32(0), 42(0), 43(0), 50(0), 57(0), 65(0), 66(0), 73(0), 75(0), 83(0), 84(0), 86(0), 91(0), 95(0), 99(0), 124(2), 138(1), 153(1), 185(1), 193(1), 297(2), 342(2), 356(9), 365(11), 377(6), 384(3), 398(22), 408(27), 420(10), 431(14), 438(0), 440(4), 449(2), 452(15), 463(28), 471(10), 477(14), 498(2), 513(1), 526(26), 542(126), 544(9), 551(18), 554(27), 561(17), 574(26), 584(66), 1854(332), 1922(331), 1970(42), 1981(618), 1982(736), 2000(1649), 2013(1919), 2033(436), 2073(129) |

**Table S32** Harmonic frequencies (cm<sup>-1</sup>) and IR intensities (KM/Mole) of Ru<sub>3</sub>(CO)<sub>9</sub> (9-2)

| MPW1PW91/SDD                                                                                                                                                                                                                                                                                                                                                                                                            | MPW1PW91/LANL2DZ                                                                                                                                                                                                                                                                                                                                                                                                                  | BP86/SDD                                                                                                                                                                                                                                                                                                                                                                                                                       | BP86/LANL2DZ                                                                                                                                                                                                                                                                                                                                                                                                                 |
|-------------------------------------------------------------------------------------------------------------------------------------------------------------------------------------------------------------------------------------------------------------------------------------------------------------------------------------------------------------------------------------------------------------------------|-----------------------------------------------------------------------------------------------------------------------------------------------------------------------------------------------------------------------------------------------------------------------------------------------------------------------------------------------------------------------------------------------------------------------------------|--------------------------------------------------------------------------------------------------------------------------------------------------------------------------------------------------------------------------------------------------------------------------------------------------------------------------------------------------------------------------------------------------------------------------------|------------------------------------------------------------------------------------------------------------------------------------------------------------------------------------------------------------------------------------------------------------------------------------------------------------------------------------------------------------------------------------------------------------------------------|
| 21(0), 32(0), 45(0), 52(0), 72(0), 73(0), 78(0), 82(0), 85(0), 88(1), 91(0), 94(0), 102(0), 104(1), 128(0), 150(0), 171(0), 213(1), 222(1), 224(0), 226(1), 245(0), 357(66), 374(1), 382(0), 390(0), 406(11), 408(0), 433(20), 433(0), 439(4), 444(10), 452(0), 455(32), 477(8), 482(34), 491(6), 504(0), 521(3), 525(36), 546(115), 554(14), 556(13), 578(75), 585(128), 631(1), 641(172), 668(87), 1906(968), 1913(8) | 21(0), 31(0), 45(0), 51(0), 70(0), 72(0), 76(0), 83(0), 83(0), 86(0), 90(0), 91(0), 103(0), 104(1), 128(0), 144(0), 168(0), 207(1), 214(1), 218(1), 221(1), 239(0), 340(65), 363(1), 373(0), 378(0), 387(8), 404(0), 415(15), 424(0), 429(3), 433(2), 442(0), 445(34), 472(35), 472(7), 483(6), 495(0), 507(12), 517(32), 534(84), 542(11), 544(14), 565(70), 574(113), 616(9), 630(138), 659(104), 1914(969), 1921(9), 1975(829) | 8(0), 32(0), 45(0), 50(0), 69(0), 70(0), 73(0), 76(0), 78(0), 84(0), 88(0), 89(0), 94(0), 96(1), 121(0), 144(1), 171(0), 204(0), 209(1), 214(1), 222(0), 235(0), 347(29), 353(0), 362(3), 366(0), 385(0), 392(11), 409(1), 418(13), 419(2), 429(0), 429(8), 435(14), 460(32), 463(6), 480(0), 481(2), 487(3), 509(18), 514(81), 533(11), 536(38), 544(60), 557(105), 599(13), 609(130), 633(46), 1802(709), 1810(9), 1843(672) | 11(0), 31(0), 44(0), 50(0), 67(0), 68(0), 71(0), 78(0), 78(0), 82(0), 86(0), 87(0), 94(0), 97(1), 120(0), 138(0), 170(0), 199(0), 201(1), 204(1), 215(0), 229(0), 334(31), 346(0), 353(4), 356(0), 374(8), 382(0), 401(0), 405(12), 411(2), 418(6), 421(0), 426(12), 450(31), 459(5), 472(3), 473(3), 477(4), 501(15), 505(64), 522(11), 529(36), 534(55), 548(90), 589(1), 599(119), 625(59), 1809(704), 1817(9), 1857(661) |

|                                                                                      |                                                                        |                                                                        |                                                                        |
|--------------------------------------------------------------------------------------|------------------------------------------------------------------------|------------------------------------------------------------------------|------------------------------------------------------------------------|
| 1962(860), 1994(399), 2117(275),<br>2126(1335), 2129(1540), 2156(2205),<br>2186(228) | 2006(435), 2121(278), 2130(1274),<br>2134(1458), 2160(2143), 2189(226) | 1866(264), 1988(127), 1993(1453),<br>1995(1230), 2029(1715), 2053(240) | 1880(281), 1991(135), 1998(1182),<br>1998(1404), 2031(1665), 2055(234) |
|--------------------------------------------------------------------------------------|------------------------------------------------------------------------|------------------------------------------------------------------------|------------------------------------------------------------------------|

**Table S33** Harmonic frequencies (cm<sup>-1</sup>) and IR intensities (KM/Mole) of Ru<sub>3</sub>(CO)<sub>9</sub> (9-3)

| MPW1PW91/SDD                                                                                                                                                                                                                                                                                                                                                                                                                                                                                        | MPW1PW91/LANL2DZ                                                                                                                                                                                                                                                                                                                                                                                                                                                                                    | BP86/SDD                                                                                                                                                                                                                                                                                                                                                                                                                                                                                       | BP86/LANL2DZ                                                                                                                                                                                                                                                                                                                                                                                                                                                                                   |
|-----------------------------------------------------------------------------------------------------------------------------------------------------------------------------------------------------------------------------------------------------------------------------------------------------------------------------------------------------------------------------------------------------------------------------------------------------------------------------------------------------|-----------------------------------------------------------------------------------------------------------------------------------------------------------------------------------------------------------------------------------------------------------------------------------------------------------------------------------------------------------------------------------------------------------------------------------------------------------------------------------------------------|------------------------------------------------------------------------------------------------------------------------------------------------------------------------------------------------------------------------------------------------------------------------------------------------------------------------------------------------------------------------------------------------------------------------------------------------------------------------------------------------|------------------------------------------------------------------------------------------------------------------------------------------------------------------------------------------------------------------------------------------------------------------------------------------------------------------------------------------------------------------------------------------------------------------------------------------------------------------------------------------------|
| 30(0), 30(0), 42(0), 47(0), 47(0), 51(1), 79(2), 79(2), 79(1), 88(0), 89(0), 89(0), 96(1), 96(1), 101(0), 125(0), 130(4), 130(4), 152(1), 152(1), 189(0), 326(8), 350(29), 350(29), 399(34), 399(34), 415(10), 415(10), 428(1), 432(0), 449(1), 456(14), 456(14), 471(18), 473(2), 473(2), 483(5), 483(5), 512(9), 542(16), 555(9), 555(9), 585(60), 585(60), 589(8), 603(4), 611(41), 611(41), 2024(152), 2024(152), 2038(1285), 2100(712), 2102(813), 2102(813), 2139(2307), 2139(2307), 2182(34) | 29(0), 29(0), 42(0), 46(0), 46(0), 50(1), 74(2), 74(2), 78(1), 87(0), 87(0), 88(0), 94(0), 94(0), 99(0), 129(2), 129(2), 131(0), 152(2), 152(2), 179(0), 309(6), 332(27), 332(27), 395(18), 395(18), 407(19), 407(19), 422(0), 427(0), 446(0), 454(7), 454(7), 462(14), 463(3), 463(3), 476(6), 476(6), 504(10), 528(16), 548(14), 548(14), 574(49), 574(49), 579(9), 584(3), 598(50), 598(50), 2025(189), 2025(189), 2037(1264), 2107(643), 2108(817), 2108(816), 2146(2132), 2146(2132), 2185(48) | 26(0), 26(0), 35(0), 46(0), 46(0), 47(1), 70(3), 70(3), 77(1), 85(0), 85(0), 85(0), 91(0), 91(0), 95(0), 120(0), 126(3), 126(3), 147(1), 147(1), 186(0), 297(5), 329(26), 329(26), 379(14), 379(14), 391(5), 391(5), 406(0), 412(1), 432(4), 432(4), 448(2), 452(4), 453(7), 453(7), 474(9), 474(9), 503(15), 516(11), 527(8), 527(8), 552(28), 552(28), 556(12), 565(0), 576(31), 576(31), 1905(120), 1905(120), 1916(985), 1972(770), 1972(770), 1973(649), 2011(1777), 2011(1777), 2048(72) | 27(0), 27(0), 38(0), 45(0), 45(0), 47(1), 66(3), 66(3), 76(1), 83(0), 83(0), 87(0), 89(0), 89(0), 92(0), 125(2), 125(2), 128(0), 148(3), 148(3), 174(0), 285(4), 314(24), 314(24), 377(4), 377(4), 384(15), 384(15), 400(0), 410(0), 426(0), 426(0), 443(4), 448(0), 449(4), 449(4), 473(9), 473(9), 493(18), 510(7), 521(14), 521(14), 544(21), 544(21), 546(7), 550(5), 564(38), 564(38), 1904(137), 1904(137), 1915(951), 1978(734), 1978(734), 1980(593), 2017(1674), 2017(1674), 2050(81) |

**Table S34** Harmonic frequencies(cm<sup>-1</sup>) and IR intensities (KM/Mole) of Ru<sub>3</sub>(CO)<sub>9</sub> (9-4)

| MPW1PW91/SDD                                                                                                                                                                                                                                                                                                                                                                            | MPW1PW91/LANL2DZ                                                                                                                                                                                                                                                                                                                                                                      | BP86/SDD                                                                                                                                                                                                                                                                                                                                                                                          | BP86/LANL2DZ                                                                                                                                                                                                                                                                                                                                                                                      |
|-----------------------------------------------------------------------------------------------------------------------------------------------------------------------------------------------------------------------------------------------------------------------------------------------------------------------------------------------------------------------------------------|---------------------------------------------------------------------------------------------------------------------------------------------------------------------------------------------------------------------------------------------------------------------------------------------------------------------------------------------------------------------------------------|---------------------------------------------------------------------------------------------------------------------------------------------------------------------------------------------------------------------------------------------------------------------------------------------------------------------------------------------------------------------------------------------------|---------------------------------------------------------------------------------------------------------------------------------------------------------------------------------------------------------------------------------------------------------------------------------------------------------------------------------------------------------------------------------------------------|
| 30(0), 33(0), 33(0), 49(0), 49(0), 56(0), 67(0), 67(0), 79(0), 79(0), 86(1), 95(0), 95(0), 99(0), 102(0), 102(0), 104(0), 114(0), 151(1), 151(1), 192(1), 354(2), 354(2), 359(29), 390(2), 390(2), 399(34), 417(2), 417(2), 438(28), 460(11), 460(11), 467(1), 467(1), 468(36), 492(1), 514(2), 515(4), 515(4), 552(30), 552(30), 565(16), 576(51), 583(11), 583(11), 610(37), 610(37), | 30(0), 33(0), 33(0), 49(0), 49(0), 56(0), 66(0), 66(0), 78(0), 78(0), 84(1), 95(0), 95(0), 97(0), 99(0), 99(0), 103(0), 111(0), 145(1), 145(1), 182(1), 346(1), 346(1), 351(26), 382(2), 382(2), 390(32), 408(2), 408(2), 427(32), 453(11), 453(11), 460(1), 460(1), 460(29), 483(2), 506(1), 508(3), 508(3), 543(25), 543(25), 556(13), 568(52), 574(10), 574(10), 600(39), 600(39), | 26(0), 26(0), 27(0), 46(0), 46(0), 52(0), 61(0), 61(0), 71(1), 71(1), 78(1), 88(0), 88(0), 91(0), 97(0), 97(0), 97(0), 103(0), 142(1), 142(1), 182(1), 340(1), 340(1), 344(9), 376(1), 376(1), 381(15), 406(1), 406(1), 424(42), 435(9), 435(9), 455(3), 455(3), 458(23), 470(1), 497(1), 500(2), 500(2), 528(30), 528(30), 537(35), 546(20), 551(3), 551(3), 574(32), 574(32), 578(2), 1949(32), | 26(0), 26(0), 28(0), 46(0), 46(0), 52(0), 60(0), 60(0), 70(0), 70(0), 77(1), 88(0), 88(0), 90(0), 94(0), 94(0), 96(0), 101(0), 137(1), 137(1), 173(1), 333(1), 333(1), 337(7), 367(1), 367(1), 373(13), 399(1), 399(1), 416(44), 429(9), 429(9), 450(3), 450(3), 451(18), 464(1), 490(1), 495(2), 495(2), 521(28), 521(28), 529(38), 539(16), 543(1), 543(1), 566(35), 566(35), 569(1), 1955(31), |

|                                                                                                                 |                                                                                                                 |                                                                                            |                                                                                            |
|-----------------------------------------------------------------------------------------------------------------|-----------------------------------------------------------------------------------------------------------------|--------------------------------------------------------------------------------------------|--------------------------------------------------------------------------------------------|
| 616(4), 2071(64), 2071(64), 2090(110),<br>2091(1290), 2091(1290), 2118(3248),<br>2151(848), 2151(848), 2207(65) | 605(2), 2078(87), 2078(88), 2094(102),<br>2096(1229), 2096(1229), 2123(3199),<br>2156(805), 2156(805), 2209(60) | 1949(32), 1972(29), 1972(968),<br>1972(968), 1989(2722), 2024(792),<br>2024(792), 2074(31) | 1955(31), 1975(33), 1976(944),<br>1976(944), 1992(2674), 2028(747),<br>2028(747), 2076(29) |
|-----------------------------------------------------------------------------------------------------------------|-----------------------------------------------------------------------------------------------------------------|--------------------------------------------------------------------------------------------|--------------------------------------------------------------------------------------------|

**Table S1A.** The total energies ( $E$ , in hartrees) and relative energies ( $\Delta E$ , in kcal/mol) for  $\text{Ru}_3(\text{CO})_{12}$ . The number of imaginary vibrational frequencies (Nimag) for each structure is also listed.

|           |                     | <b>12-1 (<math>D_3</math>)</b> | <b>12-2 (<math>C_{2v}</math>)</b> | <b>12-3 (<math>D_{3h}</math>)</b> | <b>12-4 (<math>D_{3h}</math>)</b> |
|-----------|---------------------|--------------------------------|-----------------------------------|-----------------------------------|-----------------------------------|
| MPW1PW91  | –E total            | 1645.02489                     | 1645.02199                        | 1645.02166                        | 1645.01750                        |
| /SDD      | $\Delta E$ relative | 0                              | 1.8                               | 2.0                               | 4.6                               |
|           | Nimag               | 0                              | 1(15i)                            | 1(14i)                            | 0                                 |
| BP86/SDD  | –E total            | 1645.72438                     | 1645.72391                        | 1645.72080                        | 1645.71902                        |
|           | $\Delta E$ relative | 0                              | 0.3                               | 2.2                               | 3.4                               |
|           | Nimag               | 0                              | 0                                 | 1(14i)                            | 0                                 |
| MPW1PW91  | –E total            | 1641.88324                     | 1641.88053                        | 1641.88018                        | 1641.88112                        |
| /LANL2DZ  | $\Delta E$ relative | 0                              | 1.7                               | 1.9                               | 1.3                               |
|           | Nimag               | 0                              | 1(33i)                            | 1(16i)                            | 0                                 |
| BP86/LANL | –E total            | 1642.52654                     | 1642.52621                        | 1642.52322                        | 1642.52496                        |
| 2DZ       | $\Delta E$ relative | 0                              | 0.2                               | 2.1                               | 1.0                               |
|           | Nimag               | 0                              | 0                                 | 1(15i)                            | 0                                 |

**Table S2A.** Comparison of the experimental  $\nu(\text{CO})$  vibrational frequencies ( $\text{cm}^{-1}$ ) with those predicted for the trinuclear  $\text{Ru}_3(\text{CO})_{12}$  isomers using all methods and both basis sets (predicted infrared intensities in parentheses are in  $\text{km}/\text{mol}$ ).

|                  | <b>12-1 (<math>D_3</math>)</b> | <b>12-2 (<math>C_{2v}</math>)</b> | <b>12-3 (<math>D_{3h}</math>)</b> | <b>12-4 (<math>D_{3h}</math>)</b> | Experimental |
|------------------|--------------------------------|-----------------------------------|-----------------------------------|-----------------------------------|--------------|
| MPW1PW91/<br>SDD | 2089(10)                       | 1935(880)                         | 2097(0)                           | 1970(1330)                        |              |
|                  | 2089(10)                       | 1984(250)                         | 2097(0)                           | 1970(1330)                        |              |
|                  | 2104(4)                        | 2109(75)                          | 2099(0)                           | 2012(0)                           |              |
|                  | 2110(262)                      | 2112(4)                           | 2114(20)                          | 2113(0)                           |              |
|                  | 2110(262)                      | 2121(624)                         | 2114(20)                          | 2113(0)                           |              |
|                  | 2120(81)                       | 2126(0)                           | 2117(485)                         | 2118(975)                         |              |
|                  | 2120(81)                       | 2127(167)                         | 2117(485)                         | 2118(975)                         |              |
|                  | 2129(3115)                     | 2136(129)                         | 2140(3053)                        | 2130(0)                           |              |
|                  | 2132(0)                        | 2141(2452)                        | 2141(0)                           | 2151(3186)                        |              |
|                  | 2158(2554)                     | 2163(1969)                        | 2163(2377)                        | 2177(975)                         |              |
|                  | 2158(2554)                     | 2164(2481)                        | 2163(2376)                        | 2177(975)                         |              |
|                  | 2218(0)                        | 2217(58)                          | 2225(0)                           | 2228(0)                           |              |

|                      |            |                  |                  |                  |                  |              |
|----------------------|------------|------------------|------------------|------------------|------------------|--------------|
| MPW1PW91/<br>LANL2DZ | 2092(15)   | 1948(884)        | 2099(0)          | 1983(1253)       |                  |              |
|                      | 2092(15)   | 1994(256)        | 2099(0)          | 1983(1253)       |                  |              |
|                      | 2108(0)    | 2113(54)         | 2103(0)          | 2021(0)          |                  |              |
|                      | 2113(190)  | 2115(6)          | 2118(0)          | 2118(0)          |                  |              |
|                      | 2113(190)  | 2125(547)        | 2118(0)          | 2118(0)          |                  |              |
|                      | 2124(81)   | 2129(0)          | 2120(390)        | 2122(969)        |                  |              |
|                      | 2124(81)   | 2131(156)        | 2120(390)        | 2122(969)        |                  |              |
|                      | 2130(3069) | 2139(109)        | 2141(3002)       | 2134(0)          |                  |              |
|                      | 2135(0)    | 2143(2386)       | 2144(0)          | 2155(3082)       |                  |              |
|                      | 2160(2526) | 2165(1959)       | 2164(2400)       | 2179(941)        |                  |              |
|                      | 2160(2526) | 2166(2438)       | 2164(2400)       | 2179(941)        |                  |              |
|                      | 2217(0)    | 2216(58)         | 2224(0)          | 2229(0)          |                  |              |
|                      | BP86/SDD   | 1968(7)          | <b>1845(616)</b> | 1975(0)          | <b>1863(978)</b> | 298 K:       |
|                      |            | 1968(7)          | <b>1874(191)</b> | 1975(0)          | <b>1863(978)</b> | 2011(9000),  |
|                      |            | 1981(9)          | 1985(78)         | 1978(0)          | <b>1888(0)</b>   | 2017(3600),  |
|                      |            | 1989(396)        | 1986(2)          | 1991(30)         | 1986(0)          | 2031(14600), |
|                      |            | 1989(396)        | 1996(690)        | 1991(30)         | 1986(0)          | 2061(24500)  |
| 1997(34)             |            | 2000(0)          | 1995(558)        | 1995(686)        |                  |              |
| 1997(34)             |            | 2000(146)        | 1995(558)        | 1995(686)        | 90 K:            |              |
| 2005(2594)           |            | 2010(122)        | 2014(2529)       | 2006(0)          | 2008(12000),     |              |
| 2008(0)              |            | 2014(2068)       | 2017(0)          | 2021(2694)       | 2017(6400),      |              |
| 2036(1950)           |            | 2038(2088)       | 2042(1779)       | 2052(943)        | 2031(42000),     |              |
| 2036(1950)           | 2040(1399) | 2042(1779)       | 2052(943)        | 2063(48000)      |                  |              |
| 2088(0)              | 2084(69)   | 2094(0)          | 2096(0)          |                  |                  |              |
| BP86/LANL2<br>DZ     | 1970(10)   | <b>1856(612)</b> | 1976(0)          | <b>1875(932)</b> |                  |              |
|                      | 1970(10)   | <b>1883(192)</b> | 1976(0)          | <b>1875(932)</b> |                  |              |
|                      | 1983(5)    | 1987(65)         | 1980(0)          | <b>1898(0)</b>   |                  |              |
|                      | 1991(336)  | 1988(4)          | 1994(16)         | 1990(0)          |                  |              |
|                      | 1991(336)  | 1998(636)        | 1994(16)         | 1990(0)          |                  |              |
|                      | 1999(34)   | 2002(0)          | 1997(482)        | 1997(688)        |                  |              |
|                      | 1999(34)   | 2002(134)        | 1997(482)        | 1997(688)        |                  |              |
|                      | 2005(2550) | 2012(106)        | 2014(2478)       | 2008(0)          |                  |              |
|                      | 2009(0)    | 2015(2016)       | 2018(0)          | 2023(2607)       |                  |              |
|                      | 2036(1930) | 2038(2040)       | 2041(1796)       | 2053(907)        |                  |              |
|                      | 2036(1930) | 2040(1384)       | 2041(1796)       | 2053(907)        |                  |              |
| 2086(0)              | 2083(69)   | 2092(0)          | 2097(0)          |                  |                  |              |

**Table S3A** The total energies ( $E$ , in hartrees) and relative energies ( $\Delta E$ , in kcal/mol) for  $\text{Ru}_3(\text{CO})_{11}$ . The number of imaginary vibrational frequencies (Nimag) for each structure is also listed.

|                  |                     | <b>11-1 (<math>C_1</math>)</b> | <b>11-2 (<math>C_3</math>)</b> | <b>11-3 (<math>C_{2v}</math>)</b> | <b>11-4 (<math>C_s</math>)</b> |
|------------------|---------------------|--------------------------------|--------------------------------|-----------------------------------|--------------------------------|
| MPW1PW91/SDD     | -E total            | 1531.65561                     | 1531.64986                     | 1531.64564                        | 1531.64518                     |
|                  | $\Delta E$ relative | 0                              | 3.6                            | 6.3                               | 6.5                            |
|                  | Nimag               | 0                              | 1(23i)                         | 0                                 | 1(13i)                         |
| BP86/SDD         | -E total            | 1532.32473                     | 1532.31773                     | 1532.31771                        | 1532.31971                     |
|                  | $\Delta E$ relative | 0                              | 4.4                            | 4.4                               | 3.2                            |
|                  | Nimag               | 0                              | 1(21i)                         | 0                                 | 1(8i)                          |
| MPW1PW91/LANL2DZ | -E total            | 1528.52338                     | 1528.51801                     | 1528.51823                        | 1528.50596                     |
|                  | $\Delta E$ relative | 0                              | 3.4                            | 3.2                               | 10.9                           |
|                  | Nimag               | 0                              | 1(22i)                         | 1(13i)                            | 1(18i)                         |
| BP86/LANL2DZ     | -E total            | 1529.13564                     | 1529.12921                     | 1529.13199                        | 1529.12438                     |
|                  | $\Delta E$ relative | 0                              | 4.0                            | 2.3                               | 7.1                            |
|                  | Nimag               | 0                              | 1(20i)                         | 1(13i)                            | 2(15i,11i)                     |

**Table S4A** The  $\nu(\text{CO})$  vibrational frequencies ( $\text{cm}^{-1}$ ) predicted for the  $\text{Ru}_3(\text{CO})_{11}$  isomers.<sup>a</sup>

|                                                    | BP86/SDD                                                                                                                                                                                                                                                                                                                                                                                                                                                                                                        | BP86/LANL2DZ                                                                                                                                |
|----------------------------------------------------|-----------------------------------------------------------------------------------------------------------------------------------------------------------------------------------------------------------------------------------------------------------------------------------------------------------------------------------------------------------------------------------------------------------------------------------------------------------------------------------------------------------------|---------------------------------------------------------------------------------------------------------------------------------------------|
| <b>11-1</b> ( $C_i$ )                              | <b>1861(402)</b> , 1936(398), 1974(207),<br>1983(259), 1986(83), 1993(126),<br>2008(1836), 2012(191), 2018(2088),<br>2033(1285), 2081(150)                                                                                                                                                                                                                                                                                                                                                                      | <b>1870(407)</b> , 1941(389), 1978(207),<br>1985(273), 1989(73), 1996(113),<br>2009(1803), 2014(179), 2021(2032),<br>2034(1223), 2081(143), |
| <b>11-2</b> ( $C_s$ )                              | 1946(245), 1966(276), 1974(161),<br>1981(307), 1989(131), 1995(384),<br>2010(2255), 2012(52), 2023(1696),<br>2040(1415), 2088(60)                                                                                                                                                                                                                                                                                                                                                                               | 1953(194), 1969(290), 1975(163),<br>1983(290), 1991(114), 1997(362),<br>2011(2251), 2014(38), 2026(1680),<br>2040(1367), 2087(51)           |
| <b>11-3</b> ( $C_{2v}$ )                           | <b>1833(199), 1845(514)</b> , 1967(0),<br>1978(56), 1982(1205), 1988(298),<br>2004(148), 2011(2673), 2031(1069),<br>2040(1269), 2086(0)                                                                                                                                                                                                                                                                                                                                                                         | <b>1846(202), 1857(490)</b> , 1972(0),<br>1982(49), 1985(1220), 1991(330),<br>2007(138), 2015(2611), 2036(942),<br>2042(1203), 2088(0)      |
| <b>11-4</b> ( $C_s$ )                              | <b>1729(305), 1794(211)</b> , 1975(8),<br>1990(103), 1998(189), 2000(178),<br>2004(627), 2011(1590), 2038(1594),<br>2042(1900), 2073(14)                                                                                                                                                                                                                                                                                                                                                                        | <b>1751(293), 1817(225)</b> , 1977(11),<br>1991(65), 2000(232), 2002(184),<br>2006(617), 2013(1465), 2039(1553),<br>2042(1875), 2072(21)    |
| Expt <sup>Error!</sup><br>Bookmark not<br>defined. | $\text{Ru}_3(\text{CO})_{11}$ bridged form<br><b>1836(2300)</b> , 1935(3000), 1975(3000), 2005(8300), 2023(9300), 2033(29000),<br>2039(4500), 2063(15000), 2107(2500)<br>$\text{Ru}_3(\text{CO})_{11}$ terminal form<br>1975(1300), 2011(9400), 2026(20000), 2033(16000), 2042(3400),<br>2054(23000), 2062(14000), 2110(2300), 2124(300)<br>$\text{Ru}_3(\text{CO})_{11}$ in 2-MeTHF<br><b>1824(5.8), 1831(5.8)</b> , 1950(0.6), 1986(1.8), 2008(1.3), 2018(2.6), 2036(7.0),<br>2065(6.9), 2075(2.3), 2113(1.0) |                                                                                                                                             |

<sup>a</sup>For the theoretical  $\nu(\text{CO})$  frequencies the infrared intensities in parentheses are in  $\text{km}/\text{mol}$ ; for the experimental  $\nu(\text{CO})$  frequencies the infrared intensities in parentheses are estimated extinction coefficients. Bridging  $\nu(\text{CO})$  frequencies are listed in **bold** type.



**Table S5A** The total energies ( $E$ , in hartrees) and relative energies ( $\Delta E$ , in kcal/mol) for  $\text{Ru}_3(\text{CO})_{10}$ . The number of imaginary vibrational frequencies (Nimag) for each structure is also listed.

|                      |                     | <b>10-1 (<math>C_1</math>)</b> | <b>10-2 (<math>C_2</math>)</b> | <b>10-3 (<math>C_3</math>)</b> | <b>10-4 (<math>C_2</math>)</b> | <b>10-5 (<math>C_{3v}</math>)</b> |
|----------------------|---------------------|--------------------------------|--------------------------------|--------------------------------|--------------------------------|-----------------------------------|
| MPW1PW91/SDD         | –E total            | 1418.32213                     | 1418.32077                     | 1418.31038                     | 1418.30828                     | 1418.30598                        |
|                      | $\Delta E$ relative | 0                              | 0.9                            | 7.4                            | 8.7                            | 10.1                              |
|                      | Nimag               | 0                              | 1(39i)                         | 1(16i)                         | 0                              | 0                                 |
| BP86/SDD             | –E total            | 1418.96803                     | 1418.96765                     | 1418.95301                     | 1418.94418                     | 1418.94844                        |
|                      | $\Delta E$ relative | 0                              | 0.2                            | 9.4                            | 15.0                           | 12.3                              |
|                      | Nimag               | 0                              | 1(16i)                         | 1(12i)                         | 1(16i)                         | 0                                 |
| MPW1PW91/LANL2<br>DZ | –E total            | 1415.19425                     | 1415.19200                     | 1415.17798                     | 1415.17778                     | 1415.16798                        |
|                      | $\Delta E$ relative | 0                              | 1.4                            | 10.2                           | 10.3                           | 16.5                              |
|                      | Nimag               | 0                              | 1(58i)                         | 1(21i)                         | 0                              | 0                                 |
| BP86/LANL2DZ         | –E total            | 1415.78186                     | 1415.78153                     | 1415.76394                     | 1415.75605                     | 1415.75450                        |
|                      | $\Delta E$ relative | 0                              | 0.2                            | 11.2                           | 16.2                           | 17.2                              |
|                      | Nimag               | 0                              | 1(25i)                         | 1(13i)                         | 1(14i)                         | 0                                 |

**Table S6A** The  $\nu(\text{CO})$  vibrational frequencies( $\text{cm}^{-1}$ ) predicted for the  $\text{Ru}_3(\text{CO})_{10}$  isomers (infrared intensities in parentheses are in  $\text{km/mol}$ , bridging  $\nu(\text{CO})$  frequencies are in bold).

|                          | BP86/SDD                                                                                                                        | BP86/LANL2DZ                                                                                                                    |
|--------------------------|---------------------------------------------------------------------------------------------------------------------------------|---------------------------------------------------------------------------------------------------------------------------------|
| <b>10-1</b> ( $C_1$ )    | <b>1829(284),1868(146),1878(1026),</b><br><b>1905(233)</b> ,1982(213),1994(397),<br>1999(645),2021(2164),2030(1962),<br>2061(8) | <b>1834(316),1870(153),1888(985),</b><br><b>1918(230)</b> ,1984(204),1997(362),<br>2003(592),2022(2099),2032(1944),<br>2062(10) |
| <b>10-2</b> ( $C_2$ )    | <b>1851(441),1858(5),1877(1001),</b><br><b>1907(239)</b> ,1981(190),1994(359),<br>1998(664),2018(2259),2030(1996),<br>2060(2)   | <b>1853(502),1860(4),1886(932),</b><br><b>1916(256)</b> ,1983(186),1997(321),<br>2002(619),2020(2182),2032(1959),<br>2061(3)    |
| <b>10-3</b> ( $C_3$ )    | <b>1730(324),1851(304)</b> ,1968(96),<br>1980(41),1990(328),1996(280),<br>2004(981),2016(2298),2040(1755),<br>2067(93)          | <b>1756(334),1850(289)</b> ,1971(91),<br>1983(34),1994(337),1999(263),<br>2006(935),2019(2204),2042(1716),<br>2067(89)          |
| <b>10-4</b> ( $C_2$ )    | <b>1846(888),1855(968),1884(26),</b><br>1966(26),1969(653),2005(1550),<br>2012(725),2018(1576),2027(813),<br>2067(147)          | <b>1857(852),1866(948),1894(30),</b><br>1969(44),1970(578),2003(1483),<br>2011(708),2020(1583),2028(791),<br>2067(124)          |
| <b>10-5</b> ( $C_{3v}$ ) | <b>1741(259)</b> ,1960(0),1973(6),<br>1973(6),1995(224),1995(224),<br>1999(1908),2034(1865),2034(1865),<br>2066(2)              | <b>1769(265)</b> ,1962(0),1975(2),<br>1975(2),1997(216),1997(216),<br>2001(1844),2035(1827),2035(1827),<br>2065(1)              |

**Table S7A** The total energies ( $E$ , in hartrees) and relative energies ( $\Delta E$ , in kcal/mol) for  $\text{Ru}_3(\text{CO})_9$ . The number of imaginary vibrational frequencies (Nimag) for each structure is also listed.

|                  |                     | <b>9-1</b> ( $C_1$ ) | <b>9-2</b> ( $C_s$ ) | <b>9-3</b> ( $C_3$ ) | <b>9-4</b> ( $C_3$ ) |
|------------------|---------------------|----------------------|----------------------|----------------------|----------------------|
| MPW1PW91/SDD     | -E total            | 1304.95739           | 1304.95278           | 1304.94077           | 1304.93410           |
|                  | $\Delta E$ relative | 0                    | 2.9                  | 10.4                 | 14.6                 |
|                  | Nimag               | 0                    | 0                    | 0                    | 0                    |
| BP86/SDD         | -E total            | 1305.56086           | 1305.56638           | 1305.54729           | 1305.53778           |
|                  | $\Delta E$ relative | 0                    | -3.5                 | 8.5                  | 14.5                 |
|                  | Nimag               | 0                    | 0                    | 0                    | 0                    |
| MPW1PW91/LANL2DZ | -E total            | 1301.84194           | 1301.83102           | 1301.82202           | 1301.82177           |
|                  | $\Delta E$ relative | 0                    | 6.9                  | 12.5                 | 12.7                 |
|                  | Nimag               | 0                    | 0                    | 0                    | 0                    |
| BP86/LANL2DZ     | -E total            | 1302.38737           | 1302.38762           | 1302.37071           | 1302.36698           |
|                  | $\Delta E$ relative | 0                    | -0.2                 | 10.5                 | 12.8                 |
|                  | Nimag               | 0                    | 0                    | 0                    | 0                    |

**Table S8A** The  $\nu(\text{CO})$  vibrational frequencies ( $\text{cm}^{-1}$ ) predicted for the  $\text{Ru}_3(\text{CO})_9$  isomers (infrared intensities in parentheses are in  $\text{km/mol}$ , bridging  $\nu(\text{CO})$  frequencies are in bold).

|                      | BP86/SDD                                                                                                           | BP86/LANL2DZ                                                                                                       |
|----------------------|--------------------------------------------------------------------------------------------------------------------|--------------------------------------------------------------------------------------------------------------------|
| <b>9-1</b> ( $C_1$ ) | <b>1846(345),1914(334)</b> ,1966(44),<br>1976(495),1979(853),1997(1695),<br>2009(2032),2029(457),2071(131)         | <b>1854(332),1922(331)</b> ,1970(42),<br>1981(618),1982(736),2000(1649),<br>2013(1919),2033(436),2073(129)         |
| <b>9-2</b> ( $C_s$ ) | <b>1802(709),1810(9),1843(672)</b> ,<br><b>1866(264)</b> ,1988(127),1993(1453),<br>1995(1230),2029(1715),2053(240) | <b>1809(704),1817(9),1857(661)</b> ,<br><b>1880(281)</b> ,1991(135),1998(1182),<br>1998(1404),2031(1665),2055(234) |
| <b>9-3</b> ( $C_3$ ) | <b>1905(120),1905(120),1916(985)</b> ,<br>1972(770),1972(770),1973(649),<br>2011(1777),2011(1777),2048(72)         | <b>1904(137),1904(137),1915(951)</b> ,<br>1978(734),1978(734),1980(593),<br>2017(1674),2017(1674),2050(81)         |
| <b>9-4</b> ( $C_3$ ) | 1949(32),1949(32),1972(29),<br>1972(968),1972(968),1989(2722),<br>2024(792),2024(792),2074(31)                     | 1955(31),1955(31),1975(33),<br>1976(944),1976(944),1992(2674),<br>2028(747),2028(747),2076(29)                     |



## Complete Gaussian 03 reference

### (Reference 29)

Frisch, M. J.; Trucks, G. W.; Schlegel, H. B.; Scuseria, G. E.; Robb, M. A.; Cheeseman, J. R.; Montgomery, Jr., J. A.; Vreven, T.; Kudin, K. N.; Burant, J. C.; Millam, J. M.; Iyengar, S. S.; Tomasi, J.; Barone, V.; Mennucci, B.; Cossi, M.; Scalmani, G.; Rega, N.; Petersson, G. A.; Nakatsuji, H.; Hada, M.; Ehara, M.; Toyota, K.; Fukuda, R.; Hasegawa, J.; Ishida, M.; Nakajima, T.; Honda, Y.; Kitao, O.; Nakai, H.; Klene, M.; Li, X.; Knox, J. E.; Hratchian, H. P.; Cross, J. B.; Bakken, V.; Adamo, C.; Jaramillo, J.; Gomperts, R.; Stratmann, R. E.; Yazyev, O.; Austin, A. J.; Cammi, R.; Pomelli, C.; Ochterski, J. W.; Ayala, P. Y.; Morokuma, K.; Voth, G. A.; Salvador, P.; Dannenberg, J. J.; Zakrzewski, V. G.; Dapprich, S.; Daniels, A. D.; Strain, M. C.; Farkas, O.; Malick, D. K.; Rabuck, A. D.; Raghavachari, K.; Foresman, J. B.; Ortiz, J. V.; Cui, Q.; Baboul, A. G.; Clifford, S.; Cioslowski, J.; Stefanov, B. B.; Liu, G.; Liashenko, A.; Piskorz, P.; Komaromi, I.; Martin, R. L.; Fox, D. J.; Keith, T.; Al-Laham, M. A.; Peng, C. Y.; Nanayakkara, A.; Challacombe, M.; Gill, P. M. W.; Johnson, B.; Chen, W.; Wong, M. W.; Gonzalez, C.; and Pople, J. A. Gaussian 03, Revision C.02; Gaussian, Inc., Wallingford CT, **2004**.
